# Supplementary material
Source: PubMed Central journal article supplement (PMC10435287)
Supplement: NIHMS1922156-supplement-Supporting_Information.pdf [file NIHMS1922156-supplement-Supporting_Information.pdf]

# Supporting Information

## Solid-Phase Photochemical Peptide Homologation Cyclization

Michael B. Elbaum, Mahmoud A. Elkhalfa, Gary A. Molander\*, and David M. Chenoweth\*

Department of Chemistry, University of Pennsylvania, 231 South 34th Street, Philadelphia, Pennsylvania, 19104-6323 United States

|                                                                |            |
|----------------------------------------------------------------|------------|
| <b>General Information</b>                                     | <b>S2</b>  |
| <b>General Procedures for Peptide Synthesis</b>                | <b>S3</b>  |
| <b>Crude LCMS Chromatographs</b>                               | <b>S5</b>  |
| <b>Crude HPLC Chromatographs</b>                               | <b>S8</b>  |
| <b>Standard Curves for Atosiban Peptides</b>                   | <b>S23</b> |
| <b>Purification and Characterization Data for all Peptides</b> | <b>S27</b> |
| <b><sup>1</sup>H NMR Assignment of Atosiban Peptides</b>       | <b>S44</b> |
| <b><sup>1</sup>H NMR Spectra of Peptides</b>                   | <b>S48</b> |
| <b>TOCSY Spectra of Peptides</b>                               | <b>S70</b> |
| <b><sup>13</sup>C NMR Spectra of Peptides</b>                  | <b>S80</b> |
| <b>References</b>                                              | <b>S94</b> |

## General Information

### Definition of abbreviations used:

|       |                                                                                                                  |
|-------|------------------------------------------------------------------------------------------------------------------|
| COMU  | (1-Cyano-2-ethoxy-2-oxoethylideneaminoxy)dimethylamino-morpholino-carbenium hexafluorophosphate                  |
| DIC   | <i>N, N'</i> -Diisopropylcarbodiimide                                                                            |
| DIPEA | <i>N, N</i> -Diisopropylethylamine                                                                               |
| DMF   | <i>N, N</i> -Dimethylformamide                                                                                   |
| DMP   | Dimethylphenyl                                                                                                   |
| ESI   | Electrospray Ionization                                                                                          |
| Fmoc  | 9-Fluorenylmethoxycarbonyl                                                                                       |
| HATU  | 1-[Bis(dimethylamino)methylene]-1 <i>H</i> -1,2,3-triazolo[4,5- <i>b</i> ]pyridinium 3-oxide hexafluorophosphate |
| HE    | Diethyl 1,4-dihydro-2,6-dimethyl-3,5-pyridinedicarboxylate (Hantzsch ester)                                      |
| NHPI  | <i>N</i> -Hydroxyphthalimide                                                                                     |
| Orn   | L-Ornithine                                                                                                      |
| PyAOP | (7-Azabenzotriazol-1-yl)oxytrispyrrolidinophosphonium hexafluorophosphate                                        |
| SPPS  | Solid-phase peptide synthesis                                                                                    |
| TFA   | Trifluoroacetic acid                                                                                             |
| TIPS  | Triisopropylsilane                                                                                               |
| TMP   | 2,2,6,6-Tetramethylpiperidine                                                                                    |
| TSP   | 2,2,3,3-d(4)-3-(Trimethylsilyl)propionic acid sodium salt                                                        |

### Reagents:

All commercially available reagents were used as received. Rink-amide polystyrene resin (0.36 mmol/g) was purchased from Novabiochem. All Fmoc-amino acids including Fmoc-Trp(Boc)-OH, Fmoc-Cys(tBu)-OH, Fmoc-His(Trt)-OH and COMU were purchased from Chem-Impex. TIPS was purchased from Oakwood Chemical. DIPEA, TFA, and pyridine was purchased from Fischer Scientific. DMF, CH<sub>2</sub>Cl<sub>2</sub>, Fenoprofen, methanol, and Et<sub>2</sub>O were purchased from Sigma-Aldrich. D<sub>2</sub>O was purchased from Cambridge Isotope Laboratories. TSP was purchased from Alfa-Aesar. Allyl acrylate was purchased from TCI.

### Instrumentation:

Photochemistry was performed using two Kessil PR160L linear reflector 440 nm photoreactors with an average intensity in 2x4 cm area of 137 mW/cm<sup>2</sup>. Reactions were conducted in polypropylene fritted syringes with stir bars placed on a stir plate centered 8 cm from the light source. HPLC was performed using either an Agilent Infinity II Analytical HPLC equipped with a Phenomenex Aeris C18 column 250 x 4.6 mm for analytical (1 mL/min) in an Agilent G7116A column heater; or Agilent 1260 II prep HPLC equipped with a Phenomenex Aeris C18 column (5 μM particle size, 250 x 21.2 mm (22 mL/min)). LCMS-ESI was performed on a Waters Acquity UPLC SQD equipped with an Acquity UPLC HSS C18 column (1.8 μm, 2.1 X 50 mm). High-resolution mass spectra (HRMS) were recorded on an Agilent LC/MSD TOF mass spectrometer by electrospray ionization time of flight experiments. All NMR samples were analyzed on a Bruker Ultrashield Plus 600 MHz equipped with a BBO Prodigy probe. Watergate was used for water suppression.

## General Procedure for Peptide Synthesis

All equivalents are based on resin loading.

### Fmoc Deprotections

Resin with peptide was treated with a solution of 1% HOBT (w/v), 2% DBU (v/v), in DMF at 50 mM concentration of peptide to solution (2 mL for 0.1 mmol resin) for 2 min. This was repeated two additional times, then the resin was washed with DMF (5x).

### Resin Loading

Resin loading was calculated using the manufacturer's loading on label. The resin was swelled in DMF in a fritted plastic syringe with a stir bar for 20 min. The resin was subsequently Fmoc deprotected, then allowed to equilibrate in NMP and drained. Separately, Fmoc-amino acid (5 equiv) and COMU (5 equiv) were dissolved in NMP (0.2-0.3 M), then TMP (7.5 equiv) was added, and the solution was allowed to react for 5 min then added to the resin. The reaction was allowed to proceed for 30 min, then washed with DMF (5x).

### Peptide Elongation

Fmoc-amino acids (5 equiv) and COMU (5 equiv) were dissolved in NMP (0.2-0.3 M), then TMP (7.5 equiv) was added, and the solution was allowed to react for 5 min. The solution was then added to resin equilibrated in NMP and allowed to react for 45 min. The resin was then washed with DMF (5x).

Fmoc-Asp(DMP)-OH (4 equiv) and COMU (4 equiv) were dissolved in NMP (0.2-0.3 M), then TMP (6 equiv) was added, and the solution was allowed to react for 5 min. The solution was then added to resin equilibrated in NMP and allowed to react for 45 min. The resin was then washed with DMF (5x).

### Peptide Acylation

Peptide on-resin with a free N-terminus was equilibrated in DMF. To the drained resin was added 5% acetic anhydride in pyridine (50 mM based on resin loading) and allowed to react for 5 min. The procedure was repeated two additional times. The resin was then washed with DMF (5x).

### N-Terminal Trityl Protection

Peptide on resin was washed with  $\text{CH}_2\text{Cl}_2$ , then equilibrated with dry  $\text{CH}_2\text{Cl}_2$ . Trityl chloride (10 equiv) was dissolved in dry  $\text{CH}_2\text{Cl}_2$  (0.5 M trityl chloride), then DIPEA (5 equiv) was added. The solution was taken up into the fritted syringe with the plunger on to prevent evaporation, and the reaction was allowed to proceed for 2 h. The solution was ejected from the syringe, and a second portion of the trityl solution was taken up into the syringe and allowed to react overnight.

Upon completion of the reaction, a small amount of resin (~3 mg) was acylated, cleaved, and analyzed by LCMS to determine the presence of free amine versus acylated amine.

### N-Terminal Trityl Deprotection

To resin equilibrated in  $\text{CH}_2\text{Cl}_2$  was added a solution of 4% TFA, 5% TIPS, 91%  $\text{CH}_2\text{Cl}_2$  (50 mM based on resin loading), and the mixture was allowed to react for 45 sec (solution turns yellow then clear). This was repeated three additional times. The resin was then washed with  $\text{CH}_2\text{Cl}_2$  (5x). The resin was then equilibrated in DMF containing DIPEA (5 equiv) for 2 min to neutralize any acid, then washed four times with DMF.

### Allyl Deprotection

Dry  $\text{CH}_2\text{Cl}_2$  was taken up into a fritted syringe, with the back plunger on, containing  $\text{Et}_2\text{O}$ -dried resin. The resin was allowed to equilibrate in the dry  $\text{CH}_2\text{Cl}_2$  for 10 min, then ejected. Argon was then taken up into the syringe and ejected (3x). Separately,  $\text{Pd}(\text{PPh}_3)_4$  (0.1 equiv) in a dry vial was dissolved in dry  $\text{CH}_2\text{Cl}_2$  (50 mM based on resin loading) then  $\text{PhSiH}_3$  (20 equiv) was injected into the vial. The  $\text{Pd}(\text{PPh}_3)_4$  solution was then taken up into the syringe under argon, and the reactions were allowed to proceed for 20 min. The reaction was ejected, and the resin was washed once with dry  $\text{CH}_2\text{Cl}_2$ . Argon was then taken up into the syringe and ejected (3x). The reaction was then carried out a second time. Upon completion the resin was washed with  $\text{CH}_2\text{Cl}_2$  (5x).

### **DMP Deprotection**

To resin equilibrated in CH<sub>2</sub>Cl<sub>2</sub> was added a solution of 4% TFA, 5% TIPS, 91% CH<sub>2</sub>Cl<sub>2</sub> (50 mM based on resin loading) and allowed to react for 45 sec (solution turns yellow then clear). This was repeated three additional times. The resin was then washed with CH<sub>2</sub>Cl<sub>2</sub> (5x). The resin was then equilibrated in DMF containing DIPEA (5 equiv) for 2 min to neutralize any acid, then washed four times with DMF.

### **Peptide Acrylation**

Peptide on-resin with a free N-terminus was equilibrated in NMP. Acrylic acid (5 equiv) and COMU (5 equiv) were dissolved in NMP (0.2-0.3 M), then TMP (7.5 equiv) was added, and the solution was allowed to react for 5 min. The solution was then added to resin equilibrated in NMP and allowed to react for 45 min. The resin was then washed with DMF (5x).

### **Peptide Cleavage/Deprotection**

#### **Atosiban peptides:**

To Et<sub>2</sub>O-dried resin was added a solution of 5% H<sub>2</sub>O, 5% TIPS, 90% TFA (20 mM based on resin loading), and the mixture was allowed to react for 60 min. The solution was ejected into a 15 mL conical tube. The resin was then washed with 1 mL of TFA and injected into the conical tube. The TFA was blown off with a stream of air to less than 2 mL. The tube was filled to 10 mL with cold Et<sub>2</sub>O, vortexed, then centrifuged. The tube was decanted and washed a second time with cold Et<sub>2</sub>O. The peptide pellet was dried with a stream of air, dissolved in 500 μL of 50/50 H<sub>2</sub>O/MeCN, and filtered into a HPLC vial. The tube was washed with an additional 500 μL of 50/50 H<sub>2</sub>O/MeCN and filtered into a HPLC vial.

#### **Di-Peptides:**

To Et<sub>2</sub>O dried resin was added a solution of 5% H<sub>2</sub>O, 5% TIPS, 90% TFA (20 mM based on resin loading) and allowed to react for 60 min. The solution was ejected into a 15 mL conical tube. The resin was then washed with 1 mL of TFA and injected into the conical tube. The TFA was blown off with a stream of air to less than 500 μL. The crude peptide solution was dissolved in 500 μL of 50/50 H<sub>2</sub>O/MeCN and filtered into a HPLC vial. The tube was washed with an additional 500 μL of 50/50 H<sub>2</sub>O/MeCN, and filtered into a HPLC vial.

#### **Di-Peptide Quantitative HPLC Analysis:**

To 5 mg of resin in a 2 mL Eppendorf tube was added 25 μL of H<sub>2</sub>O, 25 μL of TIPS, and the tube was filled to 500 μL with TFA. The resin was allowed to react for 10 min, then was placed under a stream of air until dry. To the tube was added 500 μL of 50/50 H<sub>2</sub>O/MeCN and filtered into an Eppendorf tube through a glass pipette with a cotton ball. To a low volume vial was added 45 μL of H<sub>2</sub>O, 40 μL of peptide sample, and 15 μL of 0.5 mM Fenoprofen. Three separate portions of resin were weighed to perform the reaction in triplicate.

### **General Procedure for On-Resin Redox Active Ester Synthesis**

Peptide on resin with a free carboxylic acid was equilibrated in dry DMF, then drained. In a separate vial, NHPI (10 equiv) was dissolved in dry DMF (100 mM based on resin loading), then DIPEA (10 equiv) was added (solution turns dark red). The solution was added to the resin and allowed to equilibrate for 5 min. In a separate vial, HATU (5 equiv) was dissolved in dry DMF (100 mM based on resin loading), then added dropwise to the resin (solution becomes clear with yellow hue) and allowed to react for 45 min. The resin was then washed with DMF (5x) then drained.

Procedure using DIC from literature.<sup>1</sup>

### **General Procedure for Solid Phase Hydroalkylation**

Hantzsch ester (10 equiv) was dissolved in dry DMF (30 mM based on resin loading). For the homologation, allyl acrylate (10 equiv) or styrene (10 equiv) was added to the solution. The mixture was suspended and added to the drained resin, in a fritted plastic syringe containing the NHPI-peptide. The reaction was stirred under a Kessil lamp at 440 nm for 2 h. The resin was then washed with DMF.

## Crude LCMS Chromatographs

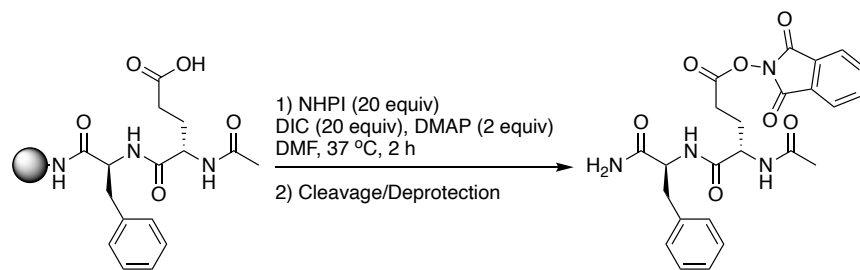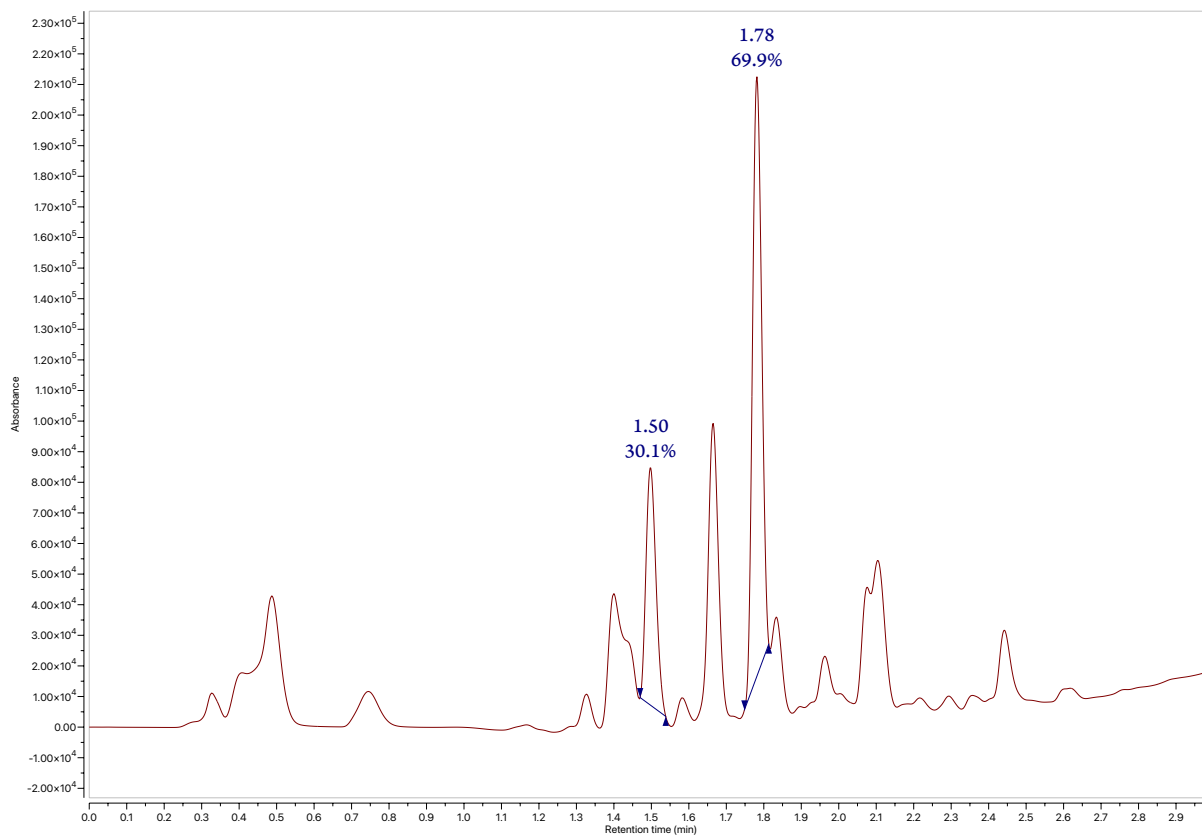

**Figure 1.** LCMS spectra of crude peptide using a linear gradient of 5-50% MeCN/H<sub>2</sub>O over 2 min. The peak at 1.50 min has a mass consistent with the cyclized product (Calc: 318.138  $m/z$  [M+H]<sup>+</sup>; Obs: 318.392  $m/z$  [M+H]<sup>+</sup>). The peak at 1.78 min has a mass consistent with the redox active ester product (Calc: 481.164  $m/z$  [M+H]<sup>+</sup>; Obs: 481.495  $m/z$  [M+H]<sup>+</sup>).

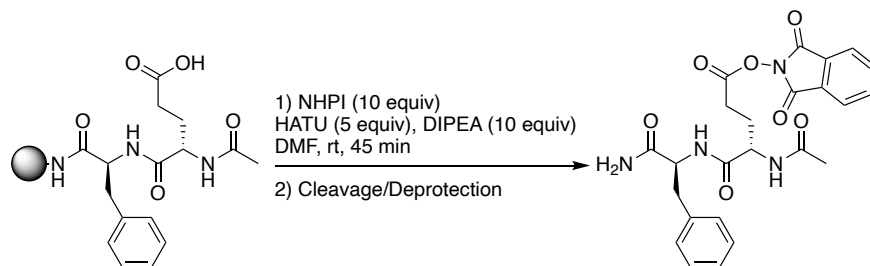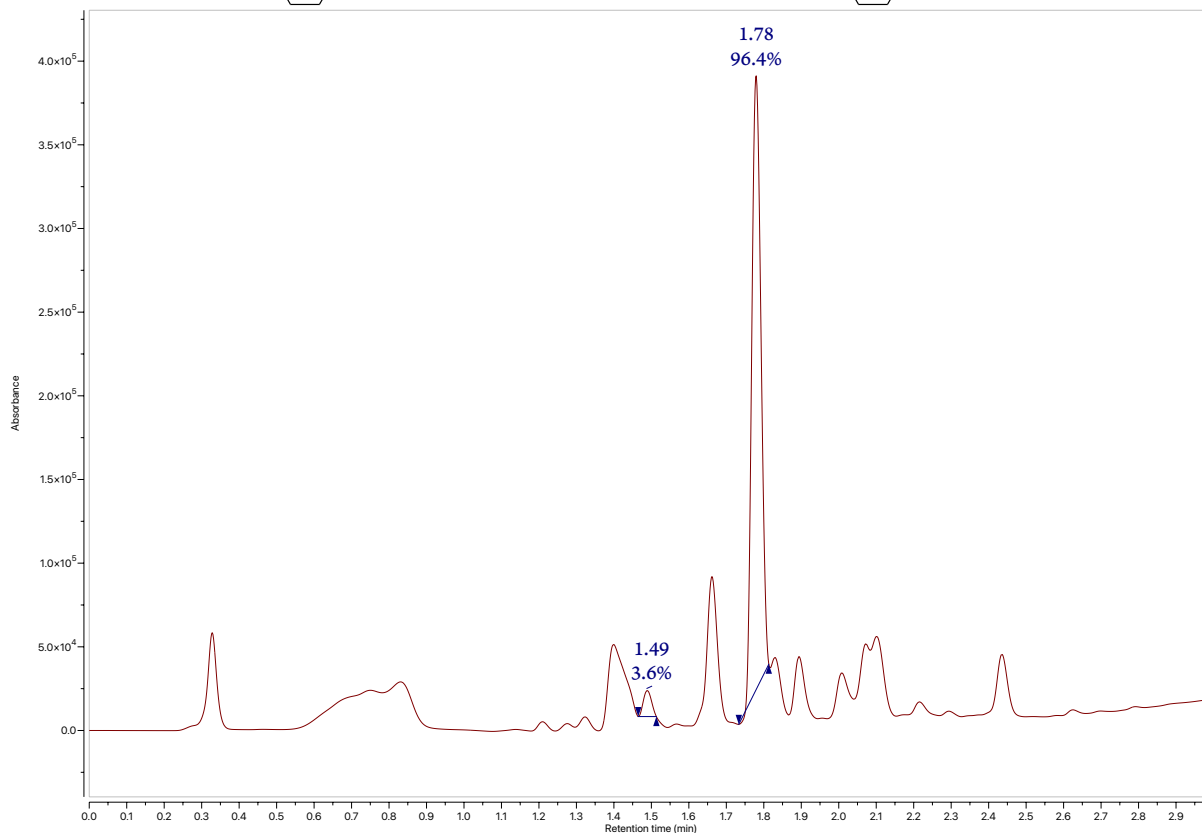

**Figure 2.** LCMS spectra of crude peptide using a linear gradient of 5-50% MeCN/ H<sub>2</sub>O over 2 min. The peak at 1.50 min has a mass consistent with the cyclized product (Calc: 318.138  $m/z$  [M+H]<sup>+</sup>; Obs: 318.392  $m/z$  [M+H]<sup>+</sup>). The peak at 1.78 min has a mass consistent with the redox active ester product (Calc: 481.164  $m/z$  [M+H]<sup>+</sup>; Obs: 481.495  $m/z$  [M+H]<sup>+</sup>).

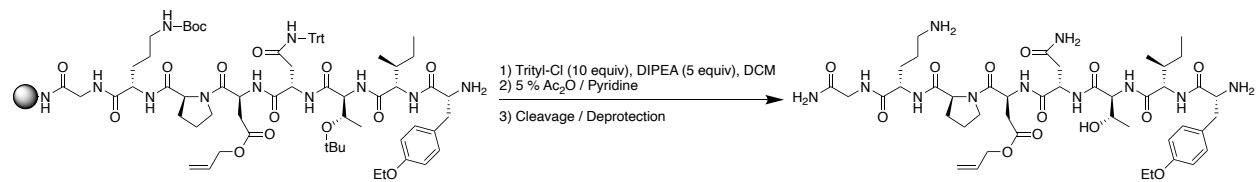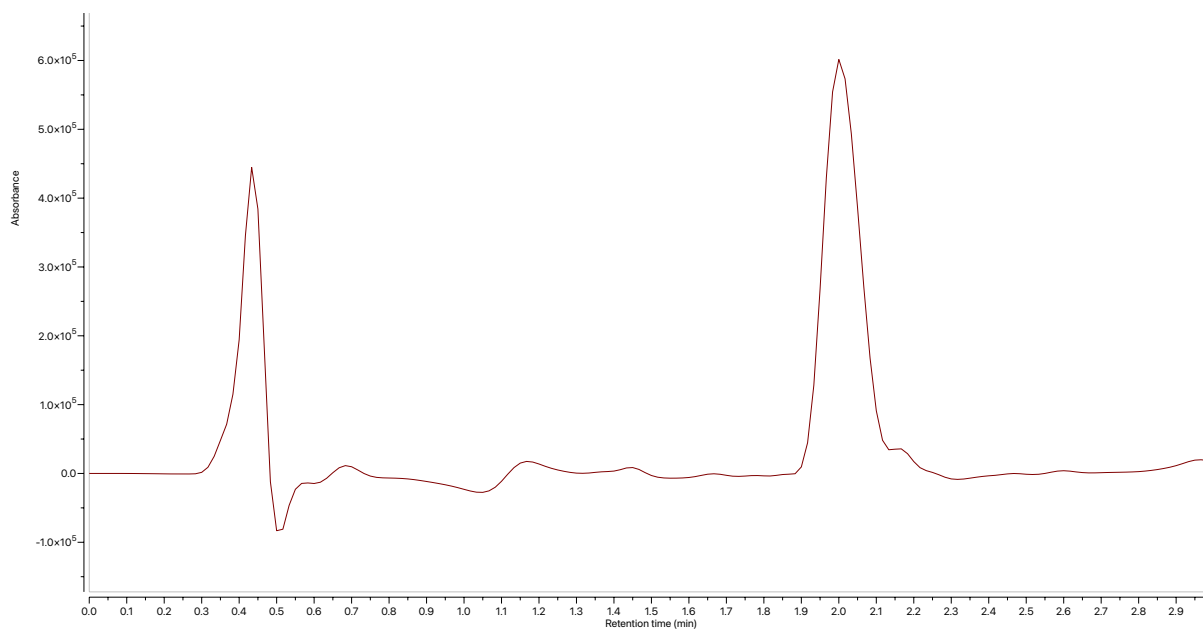

**Figure 3.** LCMS spectra of crude peptide using a linear gradient of 5-50% MeCN/H<sub>2</sub>O over 2 min. The peak at 2.00 min has a mass of 960.802  $m/z$  [M+H]<sup>+</sup> (Calc 960.508  $m/z$  [M+H]<sup>+</sup>).

## Crude HPLC analysis of reactions

**Procedure for dipeptide analysis:** 5 mg of resin containing peptide were weighed in triplicate and cleaved with 500  $\mu\text{L}$  of cleavage/deprotection solution in Eppendorf tubes. After 20 min the solutions were evaporated with a stream of air, and the dry crude peptides were then dissolved in 500  $\mu\text{L}$  50/50 MeCN/H<sub>2</sub>O and filtered through cotton in a glass pipette. Then 40  $\mu\text{L}$  of the stock solution was diluted with 45  $\mu\text{L}$  of H<sub>2</sub>O and 15  $\mu\text{L}$  of Fenoprofen (0.5 mM), then analyzed by HPLC. The ratio of the unmodified peptide to Fenoprofen is used as theoretical 100% yield.

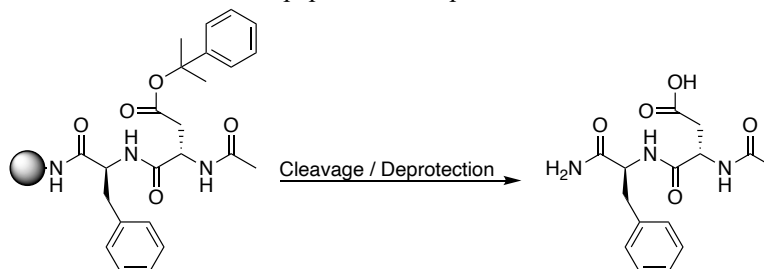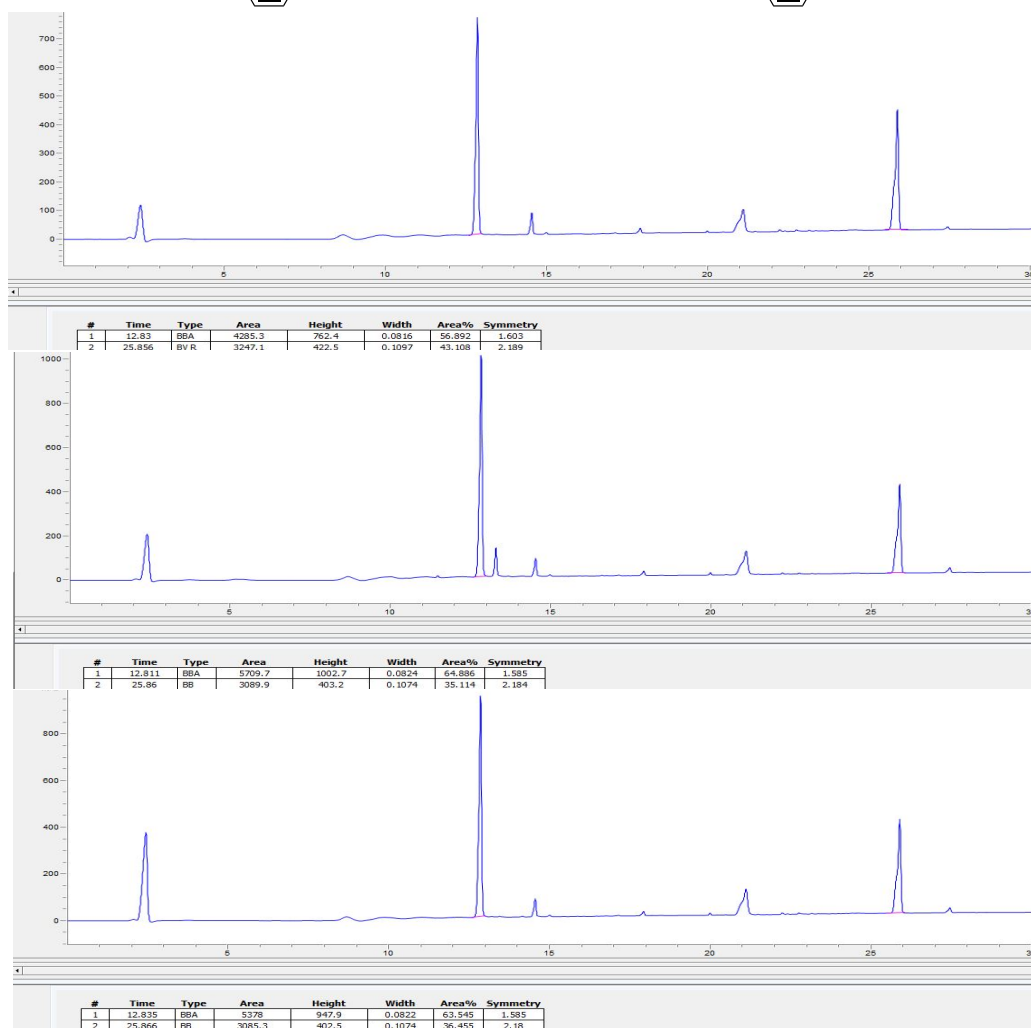

**Figure 4.** Analytical HPLC spectra for each trial of crude peptide containing 75  $\mu\text{M}$  Fenoprofen using a linear gradient of 1-60% MeCN/H<sub>2</sub>O over 30 min at 60  $^{\circ}\text{C}$ , data collected at 214 nm. Fenoprofen (25.8 min) has an average area of 3140.8. Product (12.8 min) has an average area of 5124.3. The average ratio of product area to Fenoprofen area is 1.631.



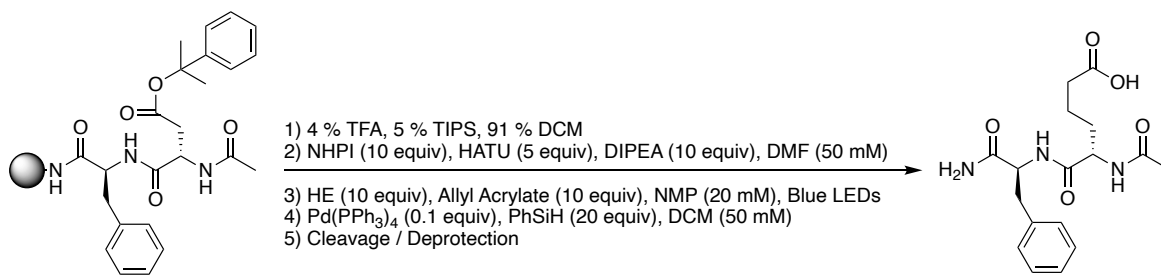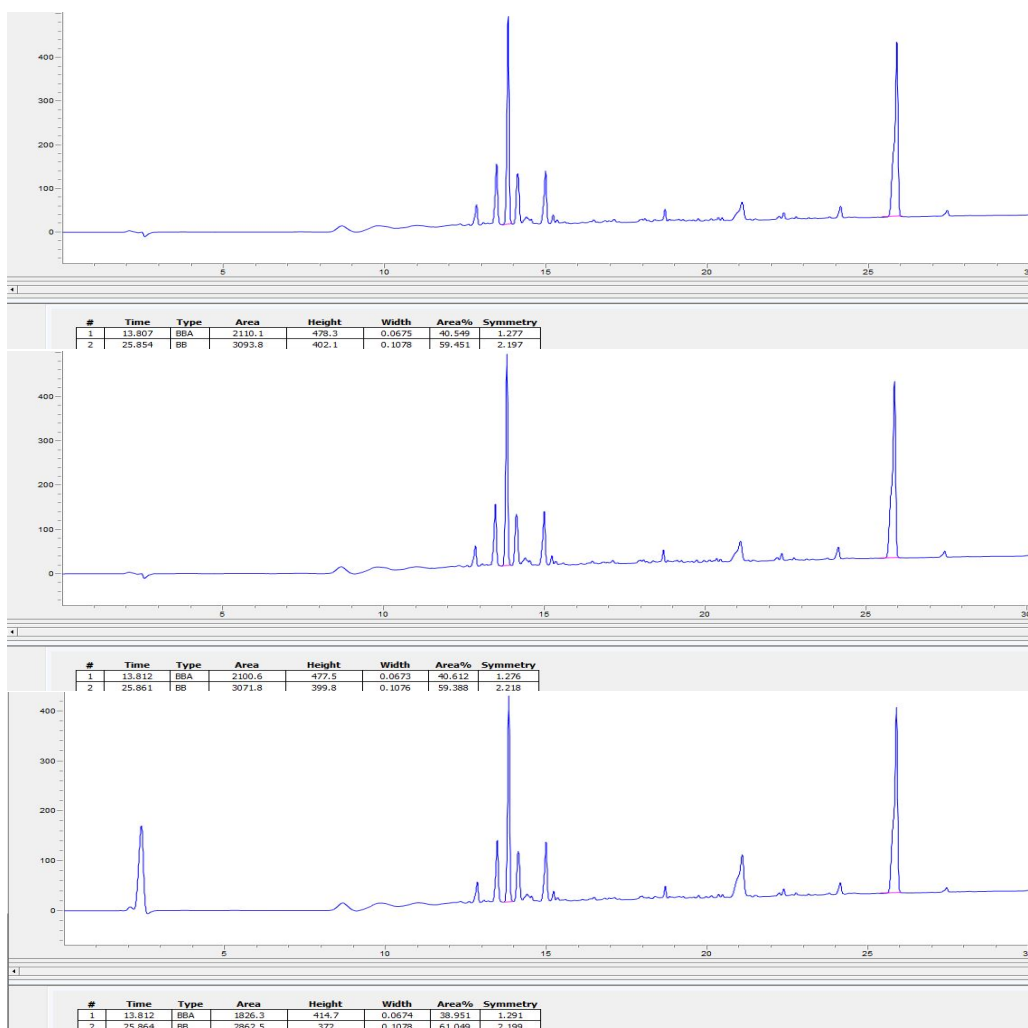

**Figure 5.** Analytical HPLC spectra for each trial of crude peptide containing 75  $\mu$ M Fenoprofen using a linear gradient of 1-60% MeCN/H<sub>2</sub>O over 30 min at 60  $^{\circ}$ C, data collected at 214 nm. Fenoprofen (25.8 min) has an average area of 3099.4. Product (13.8 min) has an average area of 2012.3. The average ratio of product area to Fenoprofen area is 0.67. The peak at 13.4 min is the decarboxylated/protonated product.

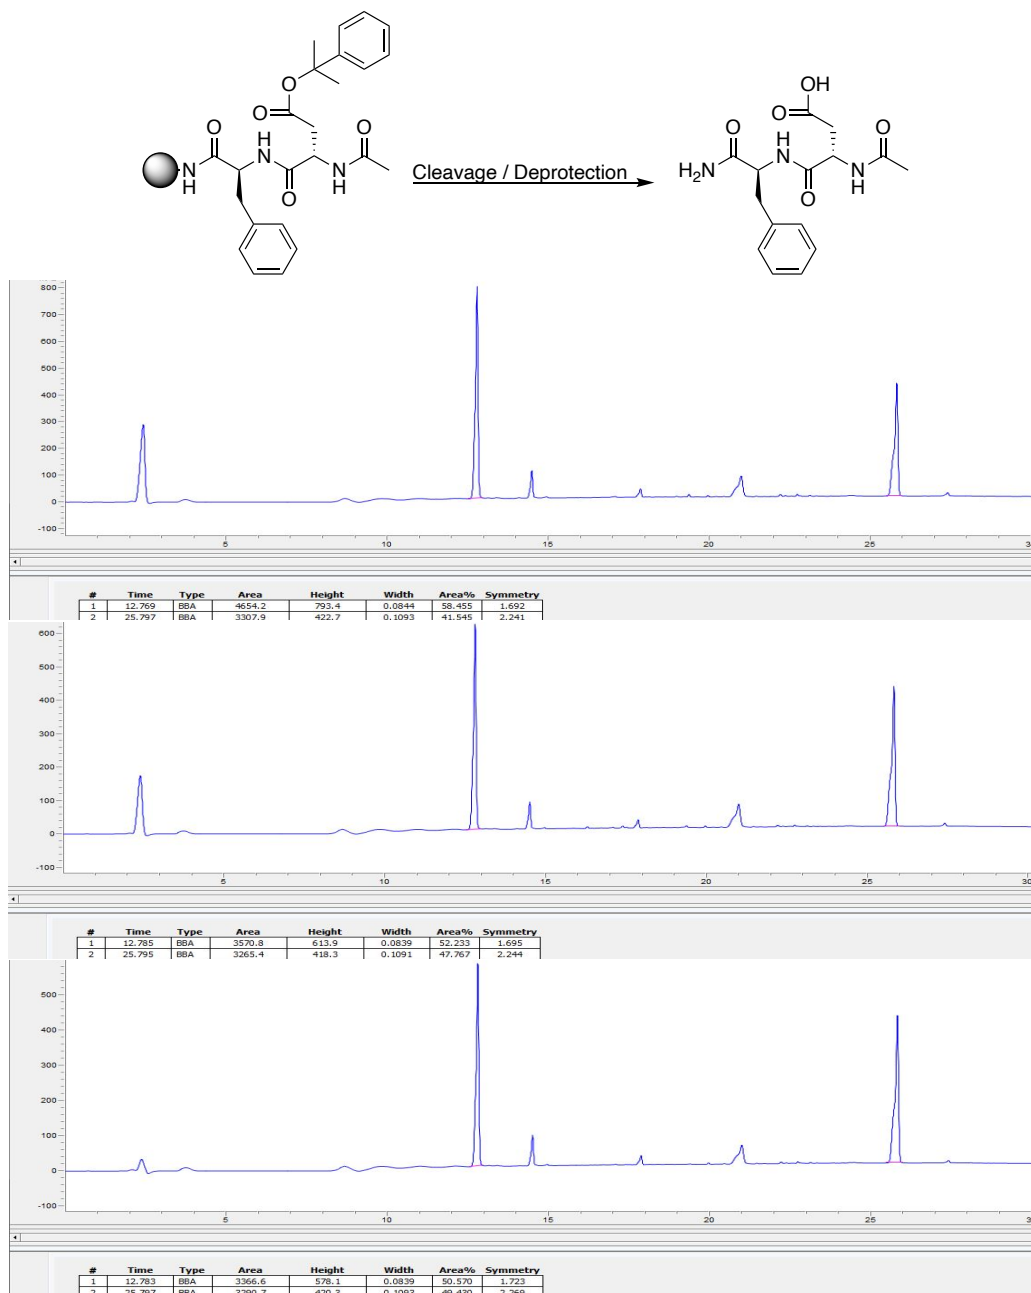

**Figure 6.** Analytical HPLC spectra for each trial of crude peptide containing 75  $\mu$ M Fenopropfen using a linear gradient of 1-60% MeCN/H<sub>2</sub>O over 30 min at 60 °C, data collected at 214 nm.. Fenopropfen (25.8 min) has an average area of 3288.0. Product (12.8 min) has an average area of 3863.9. The average ratio of product area to Fenopropfen area is 1.175.

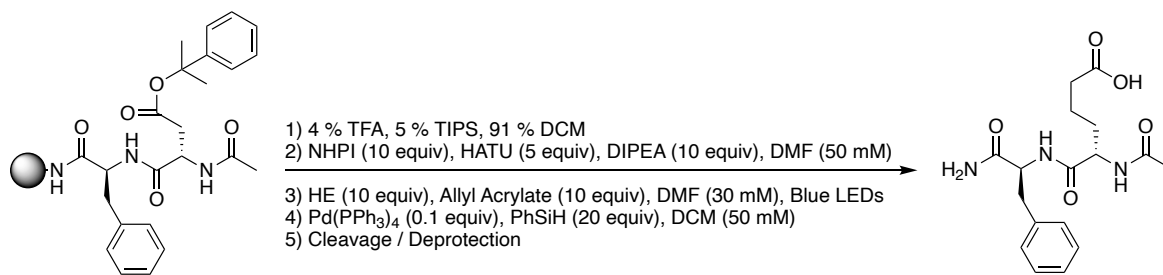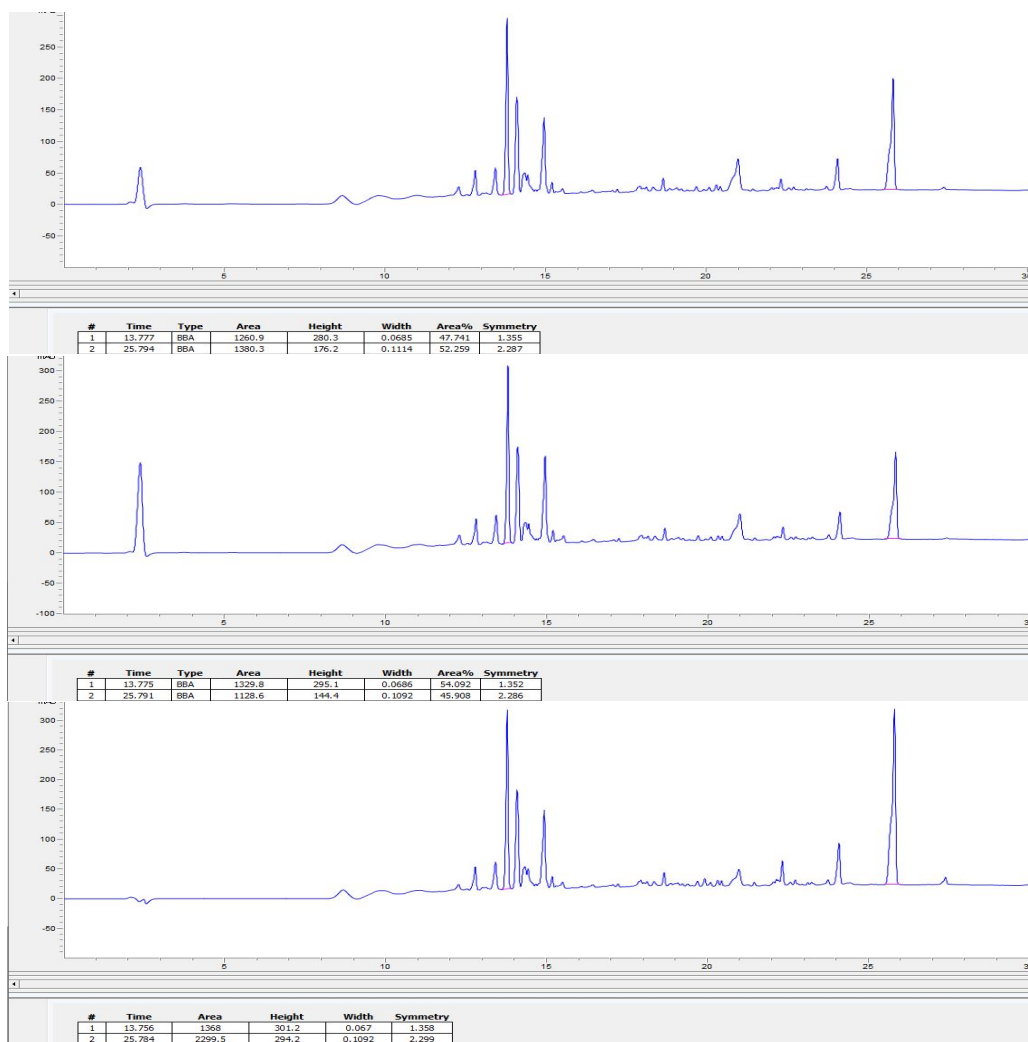

**Figure 7.** Analytical HPLC spectra for each trial of crude peptide containing 75  $\mu$ M Fenoprofen using a linear gradient of 1-60% MeCN/H<sub>2</sub>O over 30 min at 60  $^{\circ}$ C, data collected at 214 nm. Fenoprofen (25.8 min) has an average area of 1602.8. Product (13.8 min) has an average area of 1319.6. The average ratio of product area to Fenoprofen area is 0.823.

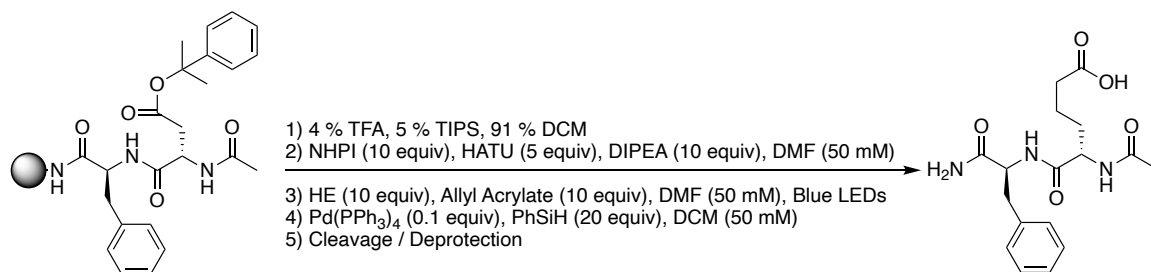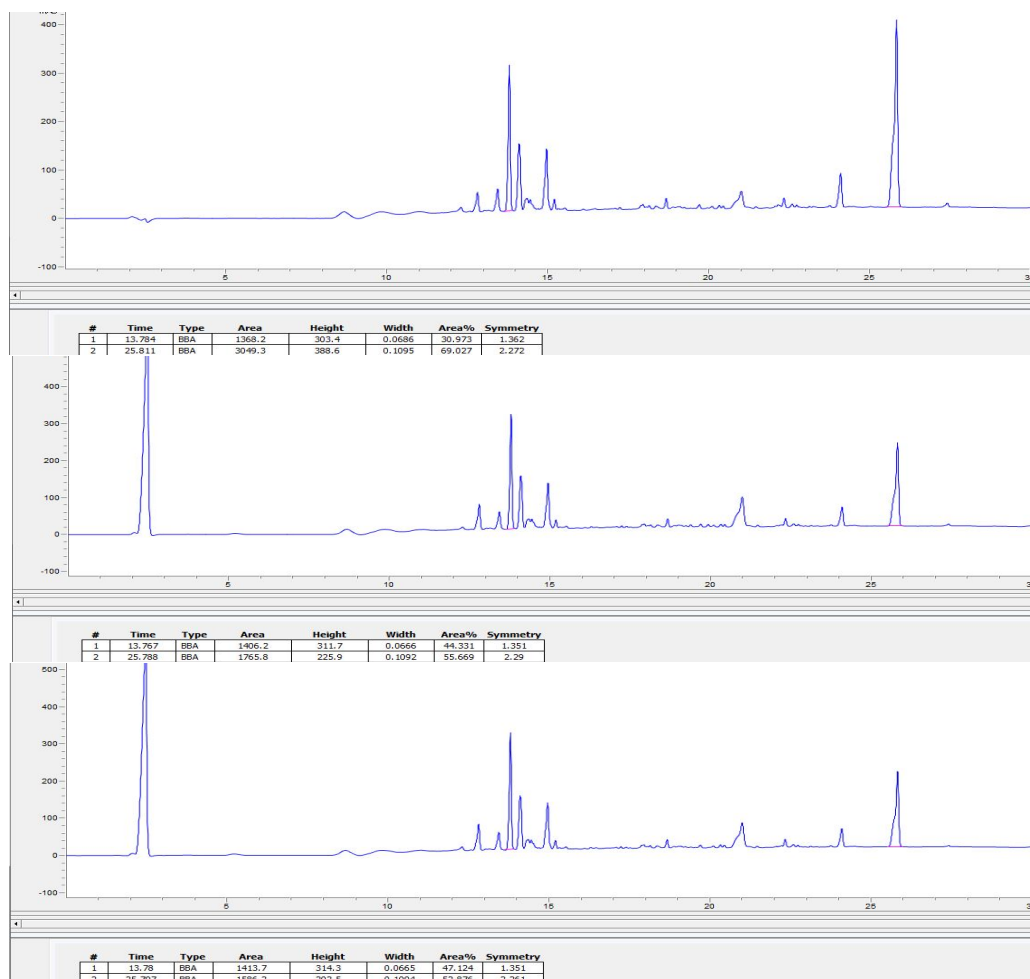

**Figure 8.** Analytical HPLC spectra for each trial of crude peptide containing 75  $\mu$ M Fenopropfen using a linear gradient of 1-60% MeCN/H<sub>2</sub>O over 30 min at 60  $^{\circ}$ C, data collected at 214 nm. Fenopropfen (25.8 min) has an average area of 2133.8. Product (13.8 min) has an average area of 1396.0. The average ratio of product area to Fenopropfen area is 0.654.

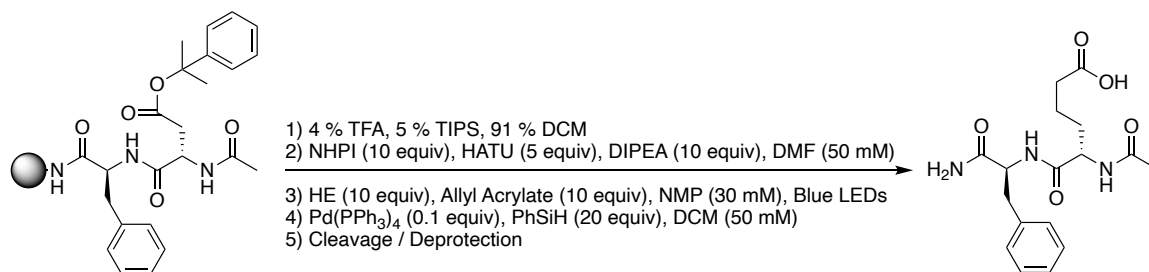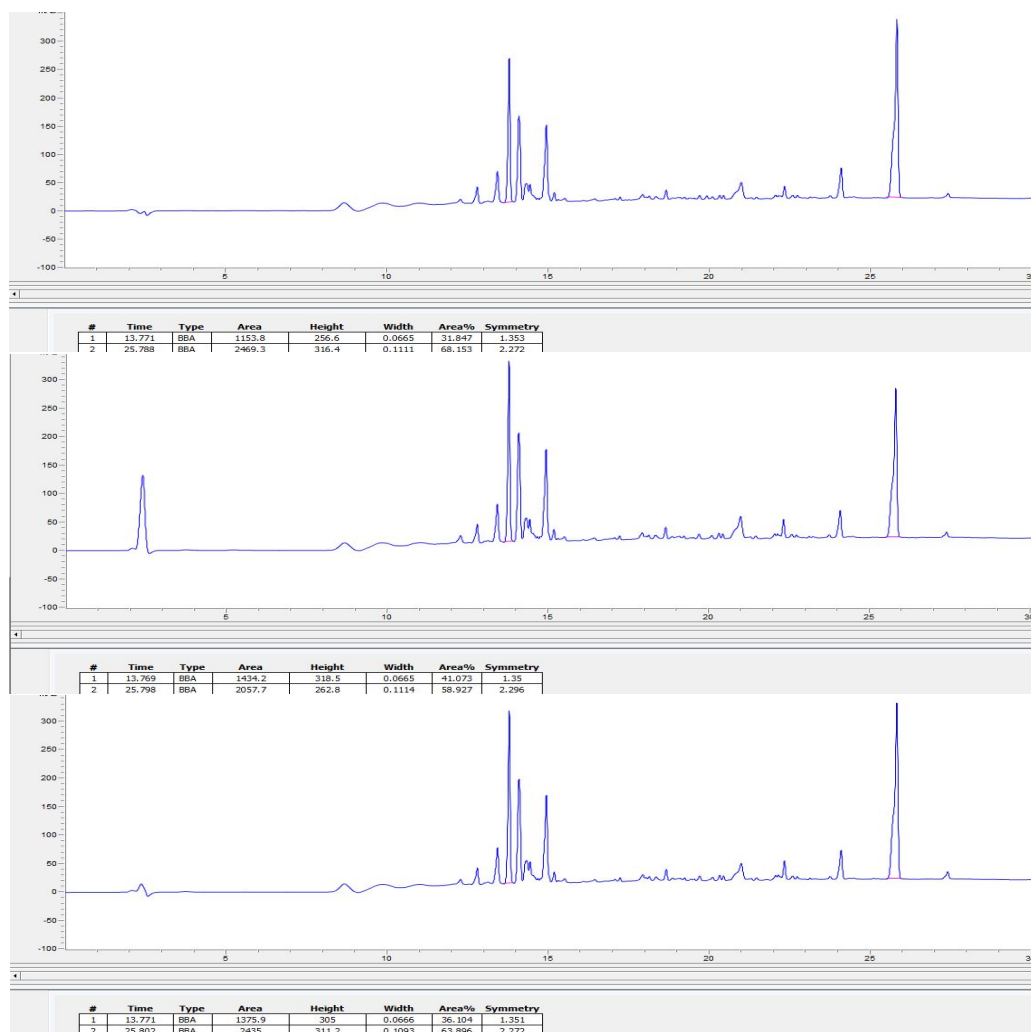

**Figure 9.** Analytical HPLC spectra for each trial of crude peptide containing 75  $\mu$ M Fenopropfen using a linear gradient of 1-60% MeCN/H<sub>2</sub>O over 30 min at 60 °C, data collected at 214 nm. Fenopropfen (25.8 min) has an average area of 2320.7. Product (13.8 min) has an average area of 1321.3. The average ratio of product area to Fenopropfen area is 0.569.

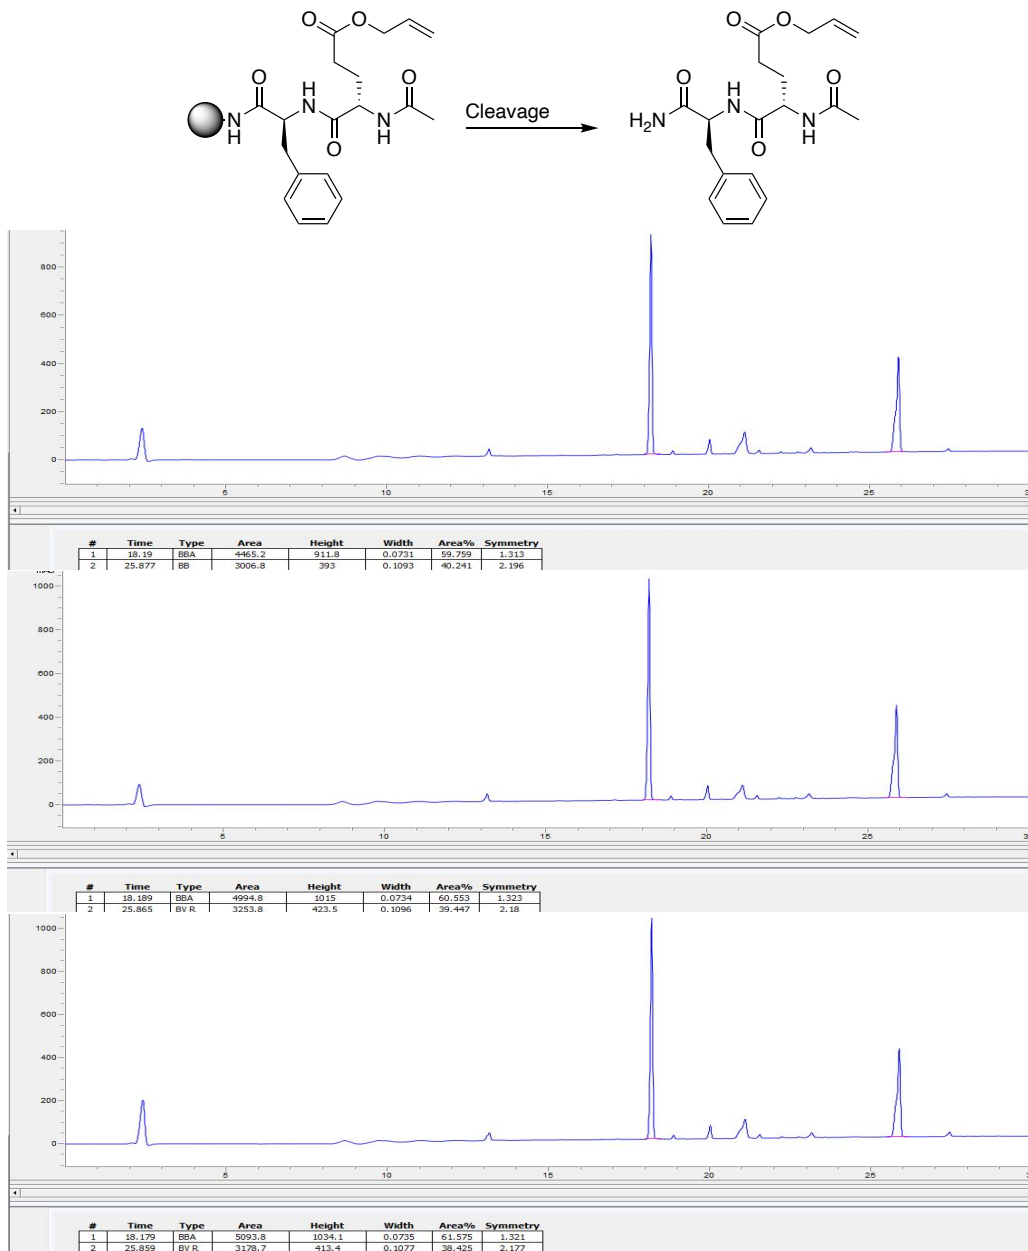

**Figure 10.** Analytical HPLC spectra for each trial of crude peptide containing 75  $\mu$ M Fenopropfen using a linear gradient of 1-60% MeCN/H<sub>2</sub>O over 30 min at 60 °C, data collected at 214 nm. Fenopropfen (25.8 min) has an average area of 3146.4. Product (18.2 min) has an average area of 4851.3. The average ratio of product area to Fenopropfen area is 1.54.

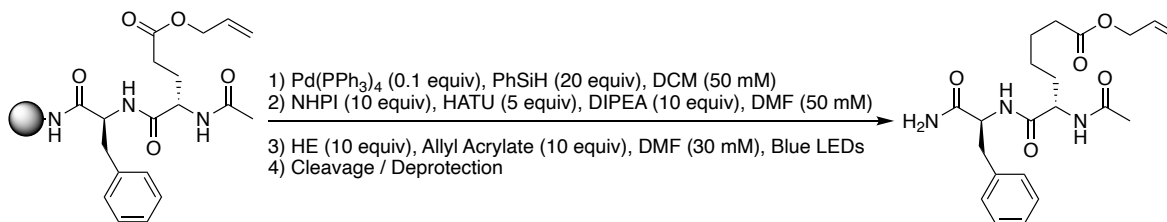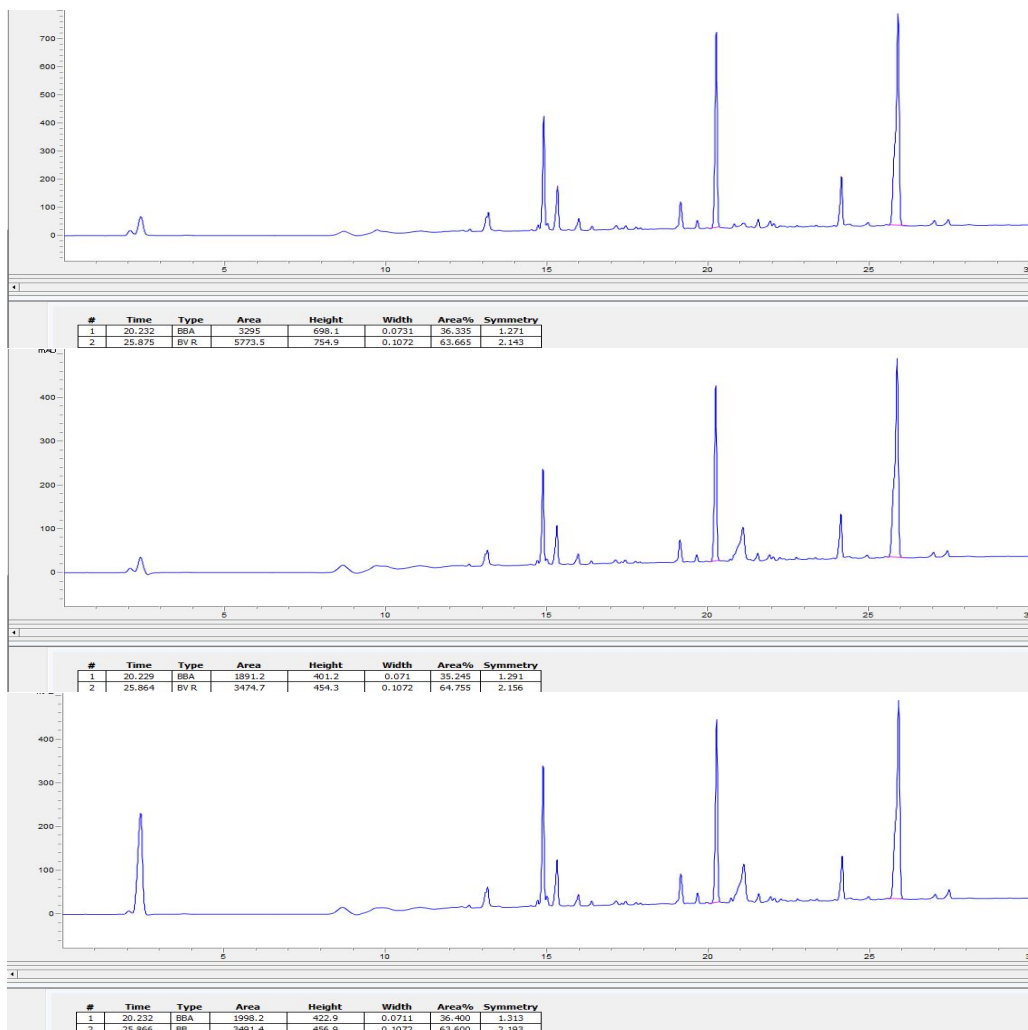

**Figure 11.** Analytical HPLC spectra for each trial of crude peptide containing 75  $\mu$ M Fenoprofen using a linear gradient of 1-60% MeCN/H<sub>2</sub>O over 30 min at 60 °C, data collected at 214 nm. Fenoprofen (25.8 min) has an average area of 4246.5. Product (20.2 min) has an average area of 2394.8. The average ratio of product area to Fenoprofen area is 0.56. The peak at 14.8 min is the decarboxylated/protonated product.

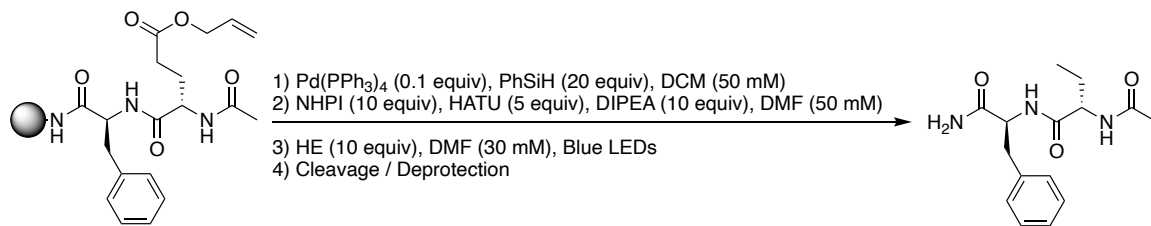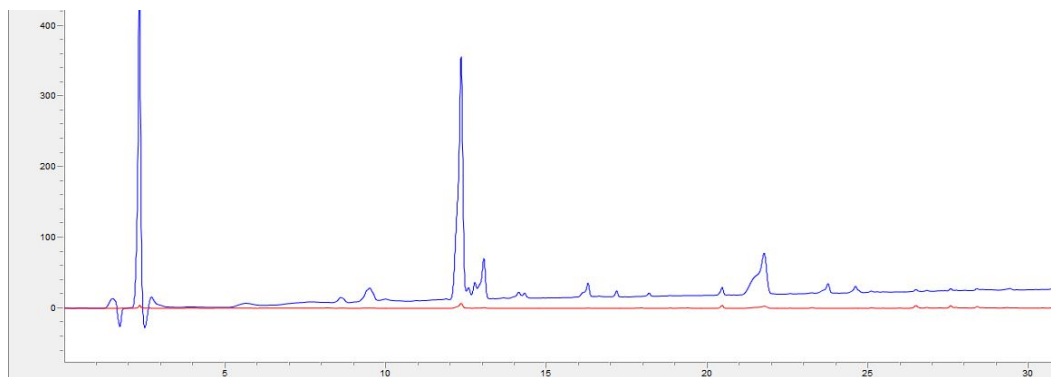

**Figure 12.** Analytical HPLC spectra of crude peptide using a linear gradient of 5-40% MeCN/H<sub>2</sub>O over 30 min at room temperature. Product observed as major peak at 12.3 min. Obtained 2.9 mg (0.010 mmol, 22% isolated yield) of dipeptide.



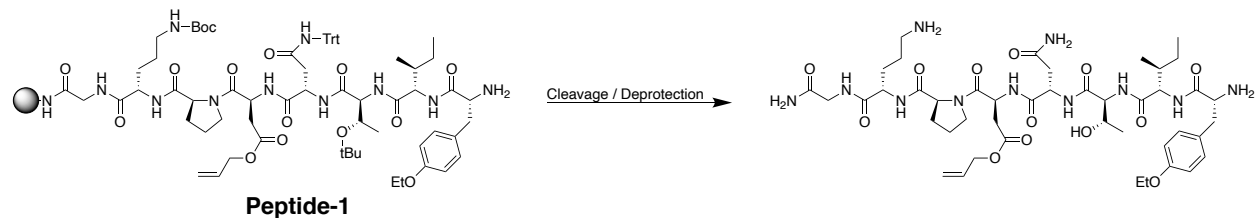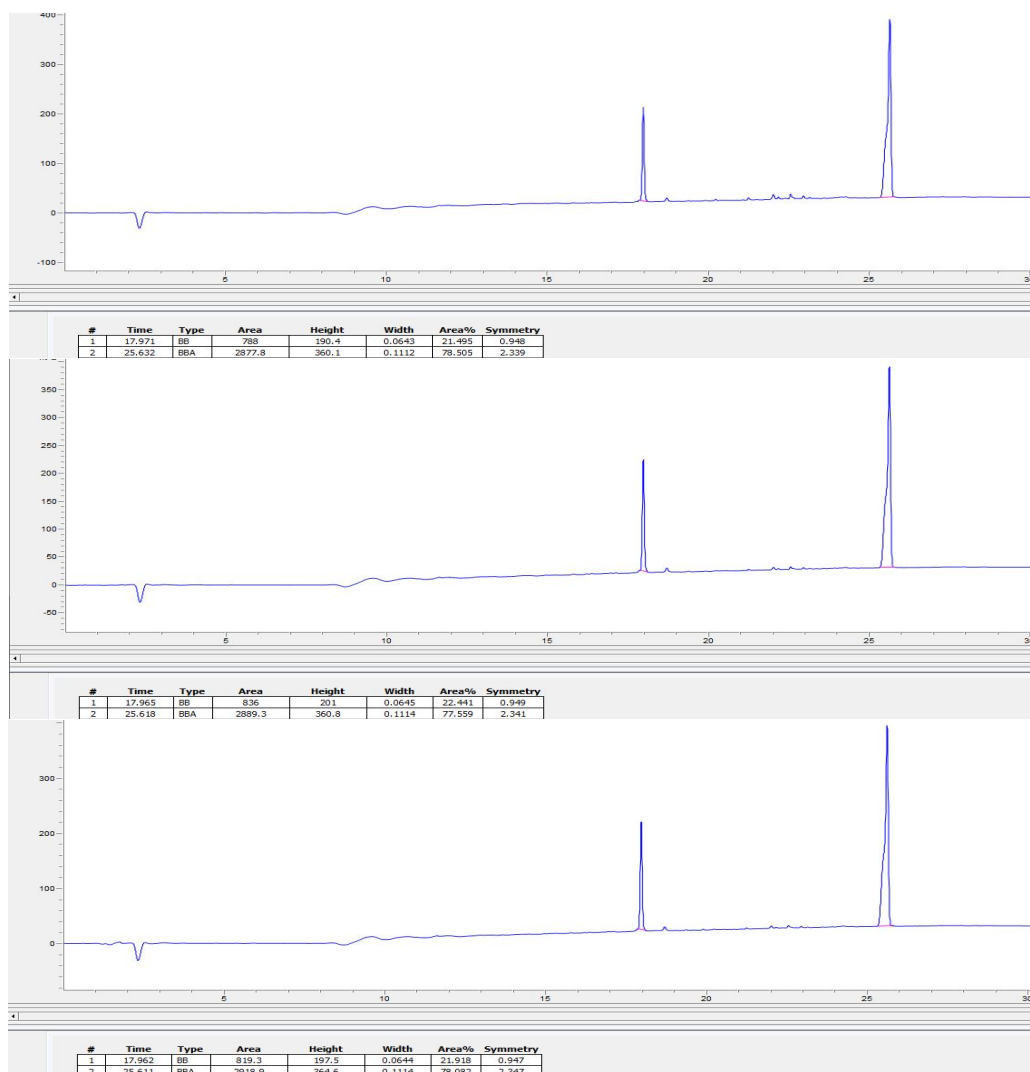

**Figure 13.** Analytical HPLC spectra of 5  $\mu$ L of crude diluted peptide (5  $\mu$ L of 1 mL stock was diluted to 20  $\mu$ L) to 50  $\mu$ L containing 75  $\mu$ M Fenopropfen using a linear gradient of 2-60% MeCN/H<sub>2</sub>O over 30 min at 60 °C. Fenopropfen (25.6 min) has an average area of 2895.3. Product (17.9 min) has an average area of 814.4. The average ratio of product area to Fenopropfen area is 0.281 (P/IS) indicating the 1 mL stock is 4.490 mM (0.0045 mmol).

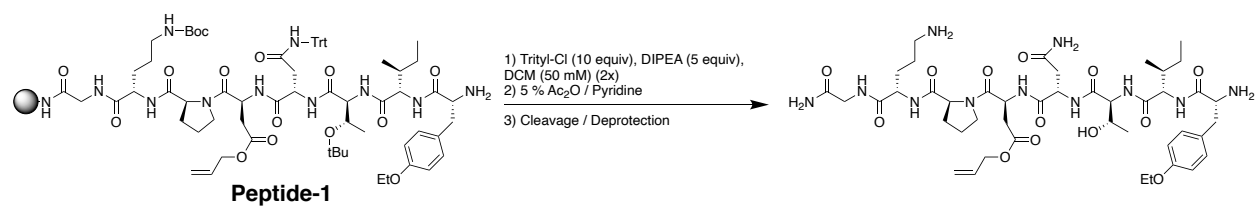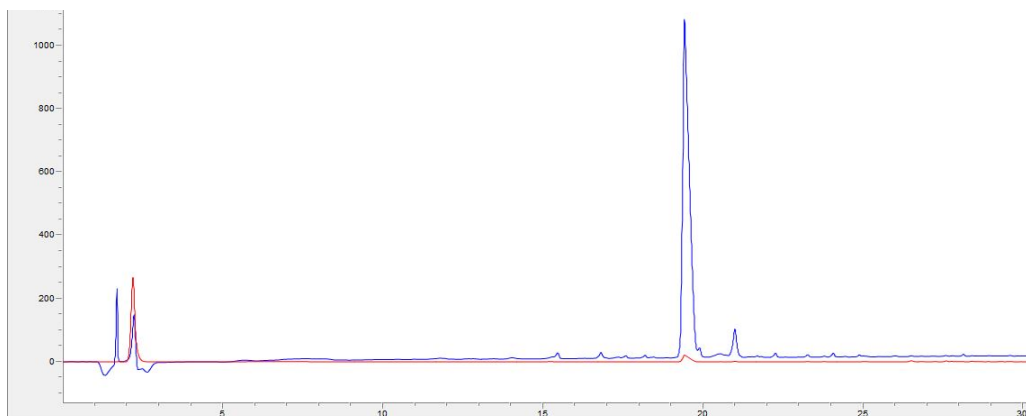

**Figure 14.** Analytical HPLC spectra of crude peptide using a linear gradient of 5-40% MeCN/H<sub>2</sub>O over 30 min at 60 °C. The peak at 19.4 min was collected and analyzed by TOF-MALDI-MS and found to have a mass of 960.487  $m/z$  [M+H]<sup>+</sup> (Calculated 960.508  $m/z$  [M+H]<sup>+</sup>).





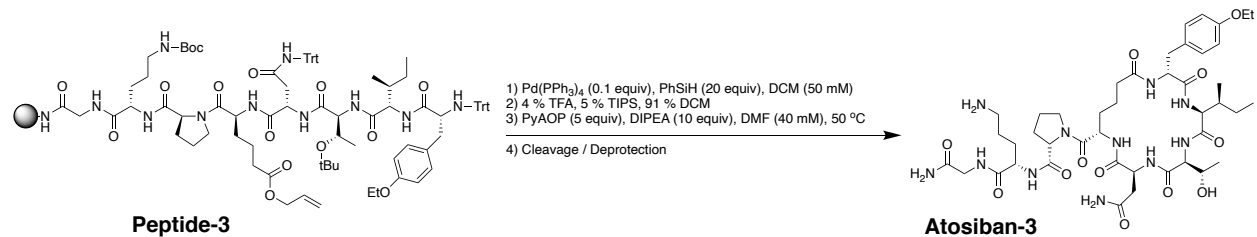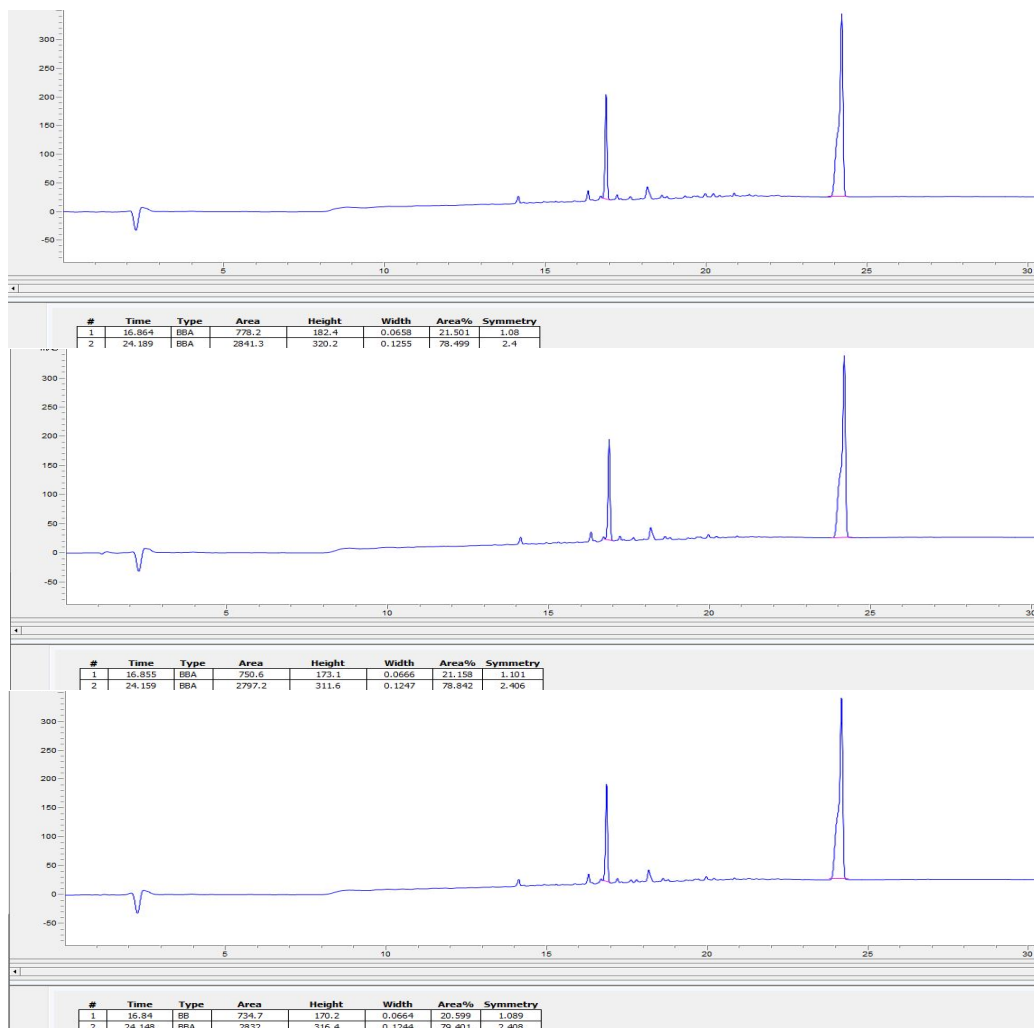

**Figure 17.** Analytical HPLC spectra of 5  $\mu$ L of crude peptide (1 mL total, 0.005 mmol) diluted to 50  $\mu$ L containing 75  $\mu$ M Fenoprofen using a linear gradient of 10-60% MeCN/H<sub>2</sub>O over 30 min at 60 °C. Fenoprofen (24.1 min) has an average area of 2823.5. Product (16.8 min) has an average area of 754.5. The average ratio of product area to Fenoprofen area is 0.267 (P/IS) indicating the crude 1 mL stock solution is 0.915 mM (0.000915 mmol).





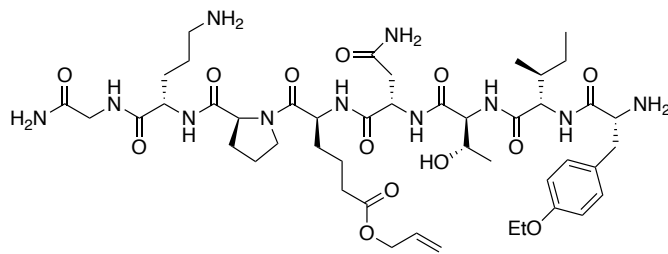

**Peptide-3**

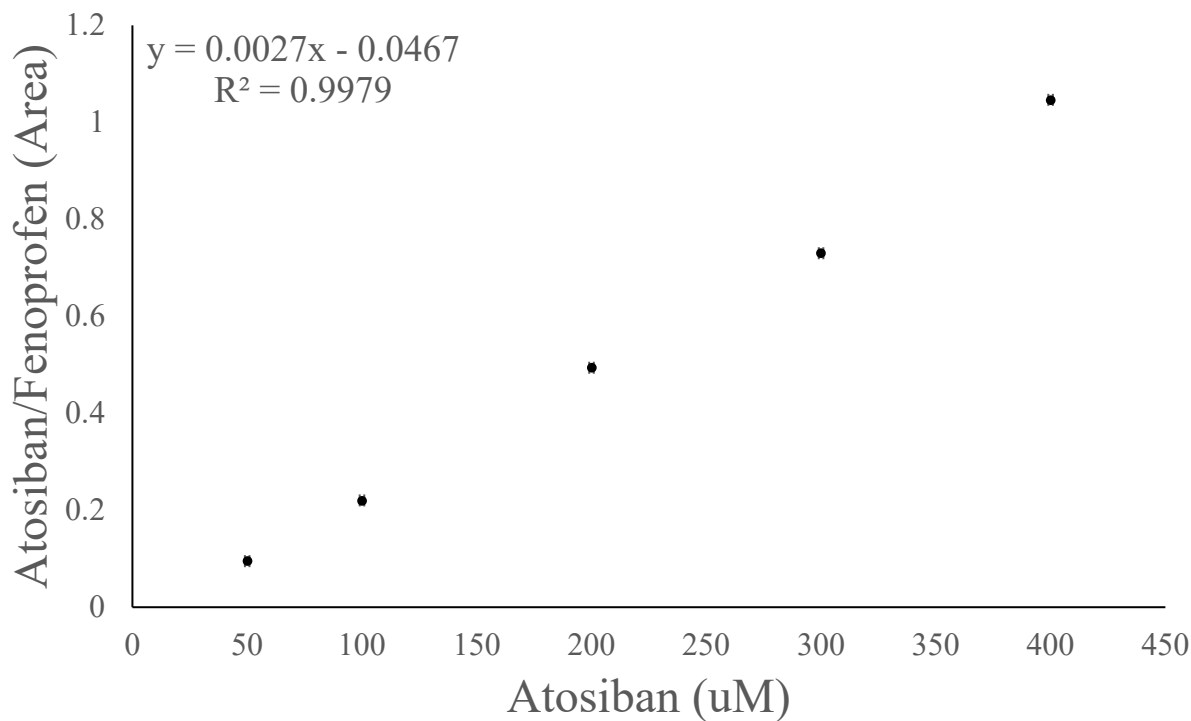

**Figure 20.** Standard curve of above peptide. NMR solution of Peptide-3 was diluted to 0.5 mM with water. The stock was then diluted to given concentrations with water in triplicate, then Fenopfen (0.5 mM) was added for a final concentration of 75  $\mu$ M. Samples were then injected (10  $\mu$ L) on analytical HPLC using a gradient of 2-60% MeCN/H<sub>2</sub>O over 30 min at 60 °C.







## Purification and Characterization Data for all Peptides

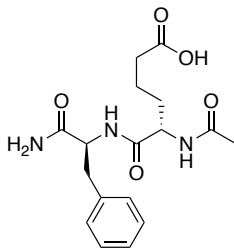

Purification: Peptide was purified on preparative HPLC using a focused gradient of 2-20% MeCN/H<sub>2</sub>O 0.1% TFA over 30 min at 60 °C. Product eluted at 13.0 min.

Analytical HPLC Gradient 1-60% MeCN/H<sub>2</sub>O (0.1% TFA) at 60 °C over 30 min (blue 214 nm, red 254 nm). Product eluted at 13.8 min.

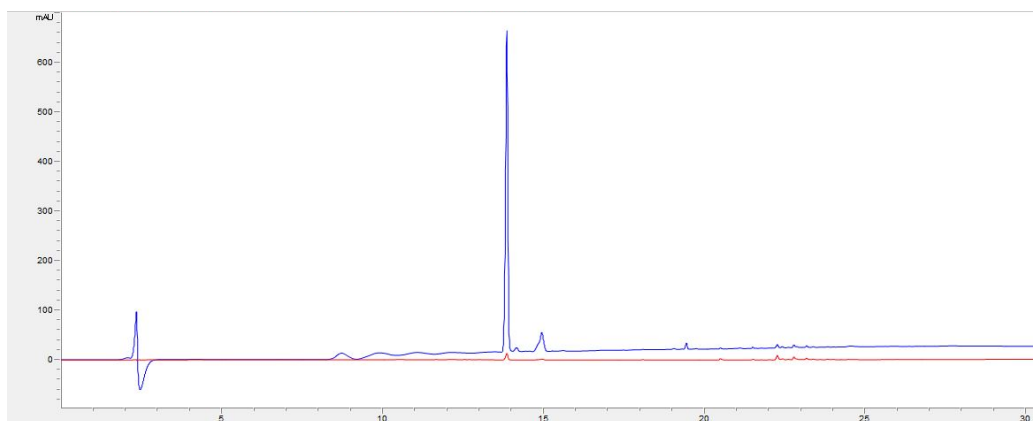

HRMS (ESI-TOF)  $m/z$ :  $[M + H]^+$  Calc'd for C<sub>17</sub>H<sub>24</sub>N<sub>3</sub>O<sub>5</sub> 350.1716; Found 350.1700

**<sup>1</sup>H NMR (600 MHz, 5% D<sub>2</sub>O/DMSO-*d*<sub>6</sub>)**  $\delta$  7.33 – 7.04 (m, 5H), 4.39 (dd,  $J$  = 9.3, 4.8 Hz, 1H), 4.10 (dd,  $J$  = 7.9, 5.4 Hz, 1H), 3.02 (dd,  $J$  = 13.8, 4.8 Hz, 1H), 2.81 (dd,  $J$  = 13.8, 9.3 Hz, 1H), 2.21 – 2.09 (m, 2H), 1.83 (s, 3H), 1.56 – 1.33 (m, 4H).

**<sup>13</sup>C NMR (151 MHz, 5% D<sub>2</sub>O/DMSO-*d*<sub>6</sub>)**  $\delta$  174.7, 173.2, 171.8, 170.3, 138.2, 129.6, 128.5, 126.7, 54.0, 53.1, 37.6, 33.7, 31.4, 22.8, 21.3.

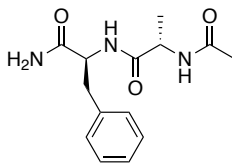

Purification: Peptide was purified on preparative HPLC using a focused gradient of 2-20% MeCN/H<sub>2</sub>O 0.1% TFA over 30 min at 60 °C. Product eluted at 11.8 min.

Analytical HPLC Gradient 1-60% MeCN/H<sub>2</sub>O (0.1% TFA) at 60 °C over 30 min (blue 214 nm, red 254 nm). Product eluted at 13.4 min.

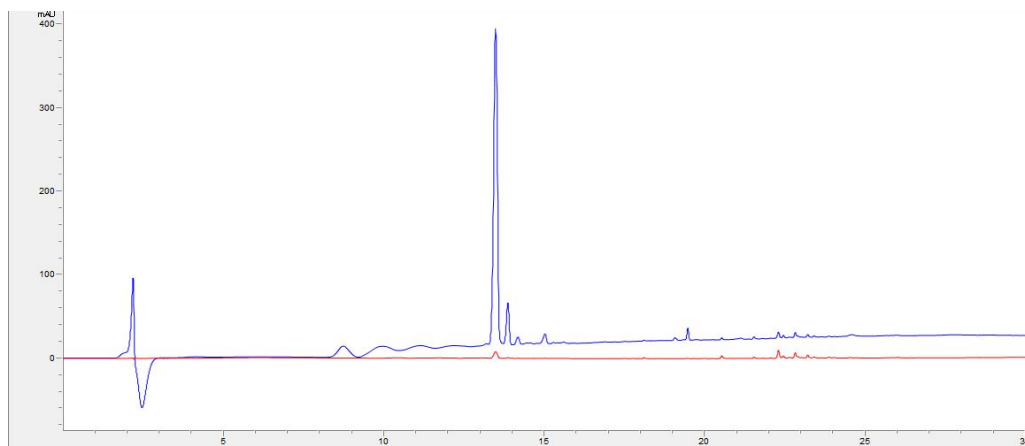

HRMS (ESI-TOF)  $m/z$ :  $[M + H]^+$  Calc'd for C<sub>14</sub>H<sub>20</sub>N<sub>3</sub>O<sub>3</sub> 278.1505; Found 278.1483

<sup>1</sup>H NMR (600 MHz, 5% D<sub>2</sub>O/DMSO-*d*<sub>6</sub>)  $\delta$  7.26 – 7.18 (m, 5H), 4.36 (dd,  $J = 9.3, 4.8$  Hz, 1H), 4.12 (q,  $J = 7.1$  Hz, 1H), 3.03 (dd,  $J = 13.8, 4.9$  Hz, 1H), 2.82 (dd,  $J = 13.8, 9.3$  Hz, 1H), 1.82 (s, 3H), 1.09 (d,  $J = 7.1$  Hz, 3H).

<sup>13</sup>C NMR (151 MHz, 5% D<sub>2</sub>O/DMSO-*d*<sub>6</sub>)  $\delta$  173.3, 172.6, 170.1, 138.3, 129.6, 128.5, 126.7, 53.9, 49.0, 37.5, 22.9, 18.0.

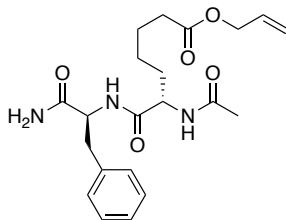

Purification: Peptide was purified on preparative HPLC using a focused gradient of 5-40% MeCN/H<sub>2</sub>O 0.1% TFA over 30 min at 60 °C. Product eluted at 20.7 min.

Analytical HPLC Gradient 1-60% MeCN/H<sub>2</sub>O (0.1% TFA) at 60 °C over 30 min (blue 214 nm, red 254 nm). Product eluted at 20.3 min.

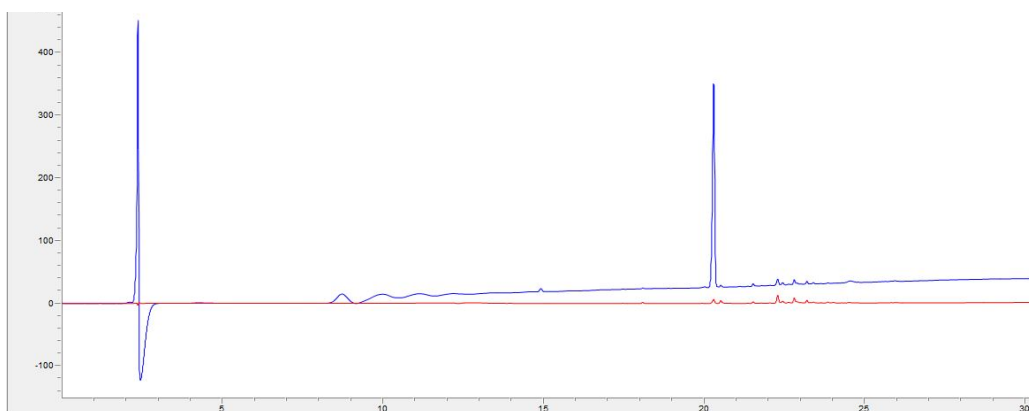

HRMS (ESI-TOF)  $m/z$ :  $[M + H]^+$  Calc'd for C<sub>21</sub>H<sub>30</sub>N<sub>3</sub>O<sub>5</sub> 404.2185; Found 404.2171

**<sup>1</sup>H NMR (600 MHz, 5% D<sub>2</sub>O/DMSO-*d*<sub>6</sub>)**  $\delta$  7.26 – 7.16 (m, 5H), 5.94 – 5.87 (m, 1H), 5.28 (dq,  $J = 17.1, 1.5$  Hz, 1H), 5.21 (dq,  $J = 10.6, 1.3$  Hz, 1H), 4.55 – 4.51 (m, 2H), 4.39 (dd,  $J = 9.4, 4.8$  Hz, 1H), 4.07 (dd,  $J = 8.7, 5.4$  Hz, 1H), 3.02 (dd,  $J = 13.9, 4.8$  Hz, 1H), 2.81 (dd,  $J = 13.9, 9.4$  Hz, 1H), 2.26 (td,  $J = 7.4, 3.4$  Hz, 2H), 1.82 (s, 3H), 1.50 – 1.40 (m, 4H), 1.18 – 1.12 (m, 2H).

**<sup>13</sup>C NMR (151 MHz, 5% D<sub>2</sub>O/DMSO-*d*<sub>6</sub>)**  $\delta$  173.3, 173.0, 171.9, 170.3, 138.3, 133.2, 129.6, 128.5, 126.7, 118.1, 64.7, 53.9, 53.2, 37.6, 33.7, 31.6, 25.1, 24.6, 22.9.

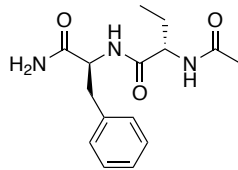

Purification: Peptide was purified on preparative HPLC using a focused gradient of 2-25% MeCN/H<sub>2</sub>O 0.1% TFA over 30 min at room temperature. Product eluted at 16.9 min.

Analytical HPLC Gradient 5-40% MeCN/H<sub>2</sub>O (0.1% TFA) at 60 °C over 30 min (blue 214 nm, red 254 nm). Product eluted at 12.3 min.

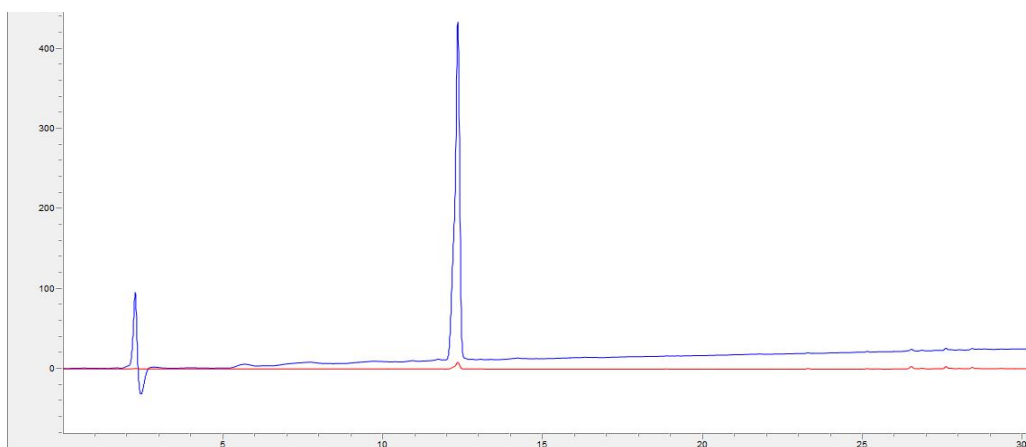

HRMS (ESI-TOF)  $m/z$ :  $[M + Na]^+$  Calc'd for C<sub>15</sub>H<sub>21</sub>N<sub>3</sub>O<sub>3</sub>Na 314.1481; Found 314.1466

<sup>1</sup>H NMR (600 MHz, 5% D<sub>2</sub>O/DMSO-*d*<sub>6</sub>)  $\delta$  7.27 – 7.15 (m, 5H), 4.40 (dd,  $J$  = 9.3, 4.8 Hz, 1H), 4.03 (dd,  $J$  = 8.1, 5.6 Hz, 1H), 3.02 (dd,  $J$  = 13.9, 4.8 Hz, 1H), 2.81 (dd,  $J$  = 13.9, 9.4 Hz, 1H), 1.83 (s, 3H), 1.55 (m, 1H), 1.43 (m, 1H), 0.74 (t,  $J$  = 7.4 Hz, 3H).

<sup>13</sup>C NMR (151 MHz, 5% D<sub>2</sub>O/DMSO-*d*<sub>6</sub>)  $\delta$  173.3, 171.8, 170.3, 138.3, 129.6, 128.5, 126.7, 54.7, 53.9, 37.6, 25.3, 22.9, 10.6.

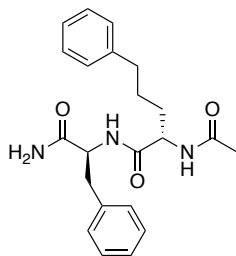

Purification: Peptide was purified on preparative HPLC using a focused gradient of 10-60 % MeCN/H<sub>2</sub>O 0.1% TFA over 30 min at room temperature. Product eluted at 19.1 min. Obtained 1.1 mg (2.9  $\mu$ moles) of product for 12 % yield.

Analytical HPLC Gradient 5-46% MeCN/H<sub>2</sub>O (0.1% TFA) at room temperature over 30 min (blue 214 nm, red 254 nm). Product eluted at 24.5 min.

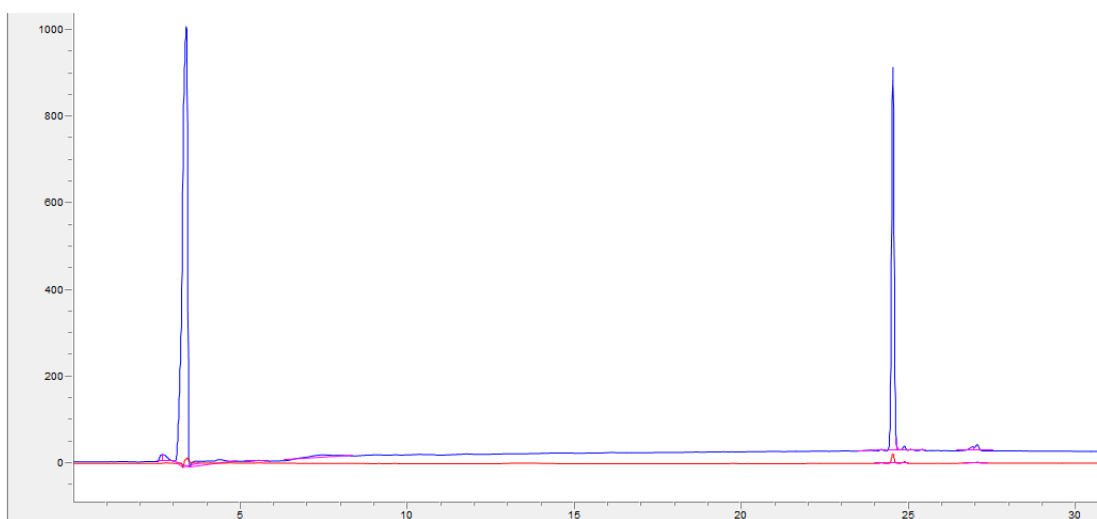

HRMS (ESI-TOF)  $m/z$ :  $[M + H]^+$  Calc'd for C<sub>22</sub>H<sub>28</sub>N<sub>3</sub>O<sub>3</sub> 382.2131; Found 382.2145

<sup>1</sup>H NMR (600 MHz, 5% D<sub>2</sub>O/DMSO-*d*<sub>6</sub>)  $\delta$  7.27 (t,  $J$  = 7.6 Hz, 2H), 7.24 – 7.12 (m, 8H), 4.38 (dd,  $J$  = 9.4, 4.8 Hz, 1H), 4.12 (t,  $J$  = 6.6 Hz, 1H), 3.02 (dd,  $J$  = 13.9, 4.7 Hz, 1H), 2.81 (dd,  $J$  = 13.8, 9.4 Hz, 1H), 1.83 (s, 3H), 1.57 – 1.38 (m, 4 H), 1.23 (m, 2H).

<sup>13</sup>C NMR (151 MHz, 5% D<sub>2</sub>O/DMSO-*d*<sub>6</sub>)  $\delta$  173.3, 171.9, 170.3, 142.3, 138.3, 129.6, 128.73, 128.71, 128.5, 126.7, 126.15, 53.9, 53.3, 37.6, 35.3, 31.7, 27.5, 22.9.

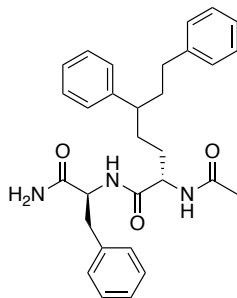

Purification: Peptide was purified on preparative HPLC using a focused gradient of 10-60 % MeCN/H<sub>2</sub>O 0.1% TFA over 30 min at room temperature. Product eluted at 27.3 min. Obtained 1.1 mg (2.3 μmoles) of product for 9 % yield.

Analytical HPLC Gradient 20-80% MeCN/H<sub>2</sub>O (0.1% TFA) at room temperature over 30 min (blue 214 nm, red 254 nm). Product eluted at 23.0 min.

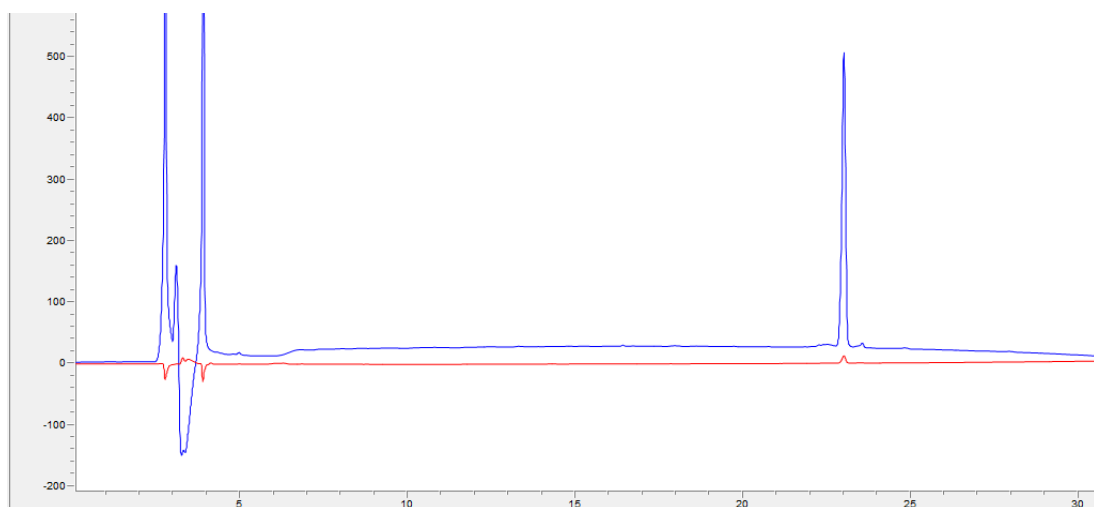

HRMS (ESI-TOF)  $m/z$ :  $[M + H]^+$  Calc'd for C<sub>30</sub>H<sub>36</sub>N<sub>3</sub>O<sub>3</sub> 486.2757; Found 486.2944

**<sup>1</sup>H NMR (600 MHz, 5% D<sub>2</sub>O/DMSO-*d*<sub>6</sub>)**  $\delta$  7.32 (td,  $J = 7.8, 3.6$  Hz, 2H), 7.26 (m, 2H), 7.23 – 7.11 (m, 8H), 7.09 (d,  $J = 7.2$  Hz, 2H), 4.38 (m, 1H), 3.98 (m, 1H), 3.01 (ddd,  $J = 13.8, 8.6, 4.7$  Hz, 1H), 2.78 (m, 1H), 2.43 (m, 1H), 2.34 (m, 2H), 1.80 (m, 5H), 1.48 (m, 2H), 1.37 – 1.32 (m, 1H), 1.17 (m, 1H).



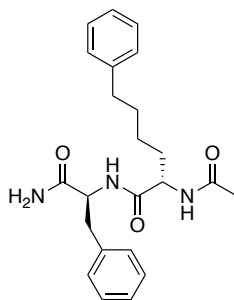

Purification: Peptide was purified on preparative HPLC using a focused gradient of 10-60 % MeCN/H<sub>2</sub>O 0.1% TFA over 30 min at room temperature. Product eluted at 21.1 min. Obtained 1.3 mg (3.3 μmoles) of product for 13 % yield.

Analytical HPLC Gradient 5-60% MeCN/H<sub>2</sub>O (0.1% TFA) at room temperature over 30 min (blue 214 nm, red 254 nm). Product eluted at 26.1 min.

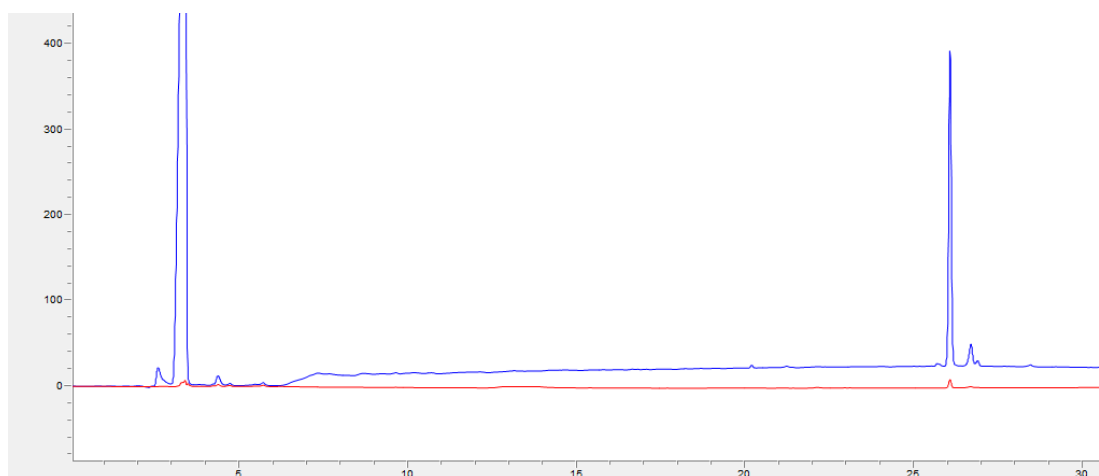

HRMS (ESI-TOF)  $m/z$ :  $[M + H]^+$  Calc'd for C<sub>23</sub>H<sub>30</sub>N<sub>3</sub>O<sub>3</sub> 396.2287; Found 396.2283

**<sup>1</sup>H NMR (600 MHz, 5% D<sub>2</sub>O/DMSO-*d*<sub>6</sub>)** δ 7.25 (dt,  $J = 13.8, 7.3$  Hz, 4H), 7.20 (d,  $J = 8.1$  Hz, 2H), 7.16 (m, 4H), 4.40 (m, 1H), 4.07 (dd,  $J = 8.6, 5.5$  Hz, 1H), 3.02 (dd,  $J = 13.9, 4.8$  Hz, 1H), 2.81 (dd,  $J = 13.8, 9.4$  Hz, 1H), 1.82 (s, 3H), 1.58 – 1.37 (m, 5H), 1.18 (m, 3H).

**<sup>13</sup>C NMR (151 MHz, 5% D<sub>2</sub>O/DMSO-*d*<sub>6</sub>)** δ 173.3, 172.0, 170.3, 142.6, 138.3, 129.6, 128.71, 128.69, 128.5, 126.7, 126.1, 53.9, 53.3, 37.6, 35.5, 31.8, 31.2, 25.4, 22.9.

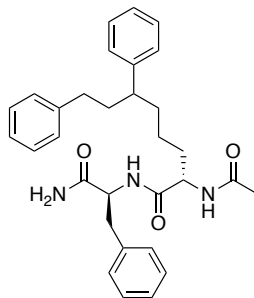

Purification: Peptide was purified on preparative HPLC using a focused gradient of 10-60 % MeCN/H<sub>2</sub>O 0.1% TFA over 30 min at room temperature. Product eluted at 28.4 min. Obtained 0.8 mg (1.6 μmoles) of product for 6 % yield.

Analytical HPLC Gradient 20-80% MeCN/H<sub>2</sub>O (0.1% TFA) at room temperature over 30 min (blue 214 nm, red 254 nm). Product eluted at 23.9 min.

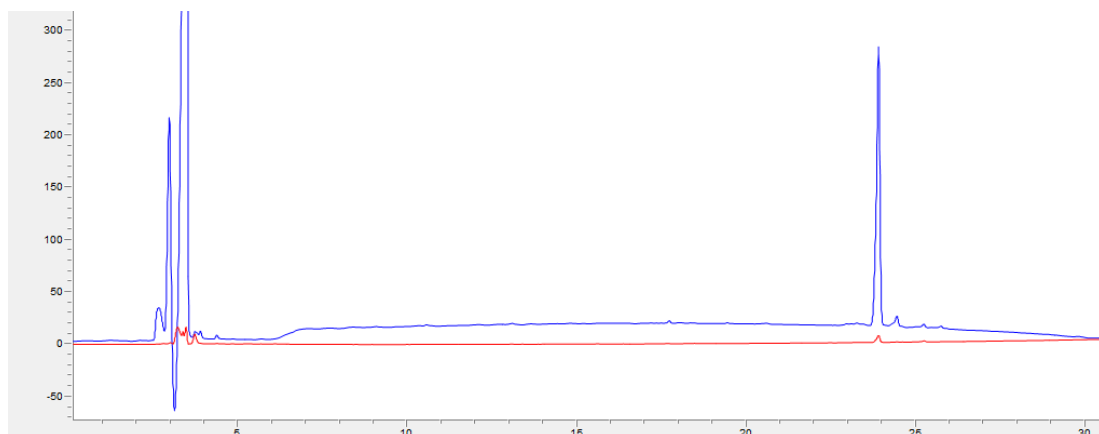

HRMS (ESI-TOF) m/z: [M + H]<sup>+</sup> Calc'd for C<sub>31</sub>H<sub>38</sub>N<sub>3</sub>O<sub>3</sub> 500.2913; Found 500.2938

<sup>1</sup>H NMR (600 MHz, 5% D<sub>2</sub>O/DMSO-*d*<sub>6</sub>) δ 7.31 (t, *J* = 7.7 Hz, 2H), 7.25 (td, *J* = 7.6, 1.9 Hz, 2H), 7.23 – 7.13 (m, 7H), 7.09 (d, *J* = 7.8 Hz, 2H), 4.36 (dd, *J* = 9.3, 4.8 Hz, 1H), 4.00 (m, 1H), 3.00 (m, 1H), 2.78 (m, 1H), 2.45 (m, 1H), 2.34 (m, 2H), 1.86 (m, 1H), 1.81 – 1.74 (m, 4H), 1.58 – 1.40 (m, 4H), 1.33 (m, 1H), 1.04 (m, 1H).

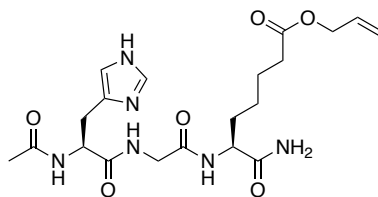

Purification: Peptide was purified on preparative HPLC using a focused gradient of 2-20 % MeCN/H<sub>2</sub>O 0.1% TFA over 30 min at room temperature. Product eluted at 18.1 min. Obtained 2.0  $\mu$ mole (6 % yield) as determined by NMR.

Analytical HPLC Gradient 2-25% MeCN/H<sub>2</sub>O (0.1% TFA) at 60 °C over 30 min (blue 214 nm, red 254 nm). Product eluted at 17.5 min.

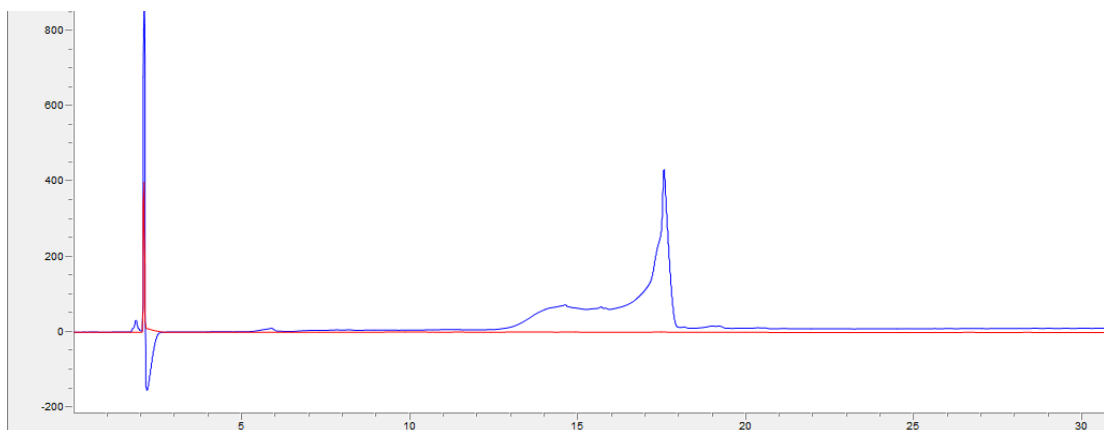

HRMS (ESI-TOF)  $m/z$ :  $[M + H]^+$  Calc'd for C<sub>20</sub>H<sub>31</sub>N<sub>6</sub>O<sub>6</sub> 451.2305; Found 451.2304

**<sup>1</sup>H NMR (600 MHz, D<sub>2</sub>O)**  $\delta$  8.62 (d,  $J$  = 1.4 Hz, 1H), 7.31 (s, 1H), 5.96 (m, 1H), 5.33 (dd,  $J$  = 17.3, 1.5 Hz, 1H), 5.27 (dd,  $J$  = 10.5, 1.4 Hz, 1H), 4.68 (dd,  $J$  = 8.5, 5.9 Hz, 1H), 4.61 (d,  $J$  = 5.6 Hz, 2H), 4.27 (dd,  $J$  = 9.3, 5.1 Hz, 1H), 3.95 (s, 2H), 3.30 (dd,  $J$  = 15.4, 5.8 Hz, 1H), 3.16 (dd,  $J$  = 15.4, 8.5 Hz, 1H), 2.43 (t,  $J$  = 7.5 Hz, 2H), 2.00 (s, 3H), 1.83 (m, 1H), 1.73 (m, 1H), 1.64 (m, 2H), 1.38 (m, 2H).

**<sup>13</sup>C NMR (151 MHz, D<sub>2</sub>O)**  $\delta$  176.8, 176.3, 174.3, 172.5, 171.2, 133.5, 131.9, 128.5, 118.3, 117.2, 65.7, 53.4, 52.7, 42.3, 33.6, 30.5, 26.2, 24.4, 23.7, 21.7.

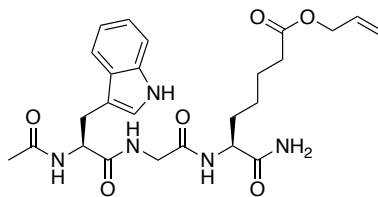

Purification: Peptide was purified on preparative HPLC using a focused gradient of 5-40 % MeCN/H<sub>2</sub>O 0.1% TFA over 30 min at room temperature. Product eluted at 19.1 min. Obtained 4.2  $\mu$ mole (8 % yield) as determined by NMR.

Analytical HPLC Gradient 5-40% MeCN/H<sub>2</sub>O (0.1% TFA) at 60 °C over 30 min (blue 214 nm, red 254 nm). Product eluted at 23.2 min.

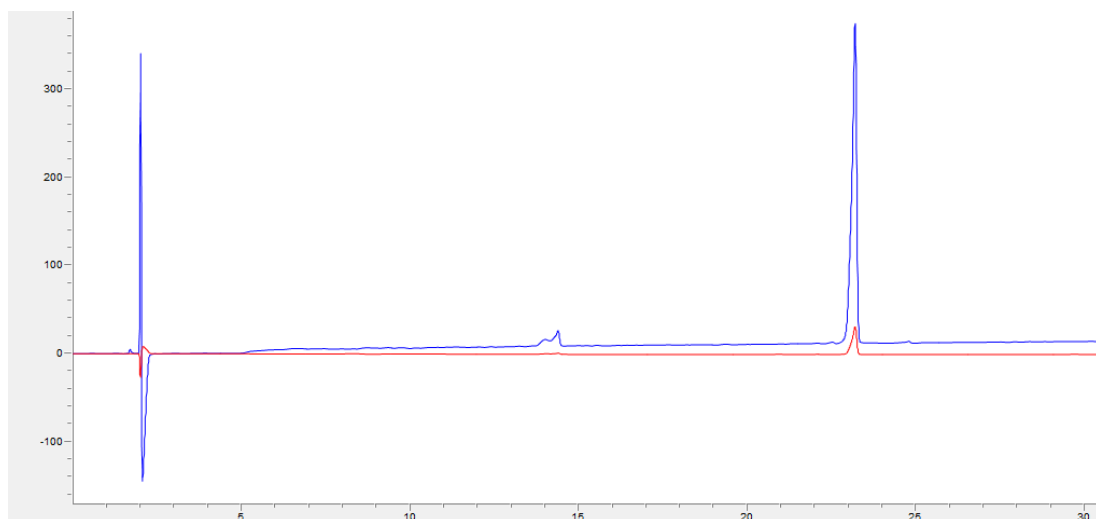

HRMS (ESI-TOF)  $m/z$ :  $[M + H]^+$  Calc'd for C<sub>25</sub>H<sub>34</sub>N<sub>5</sub>O<sub>6</sub> 500.2509; Found 500.2530

**<sup>1</sup>H NMR (600 MHz, 10% DMSO-*d*<sub>6</sub>/D<sub>2</sub>O)  $\delta$**  7.63 (d,  $J$  = 7.9 Hz, 1H), 7.48 (d,  $J$  = 8.2 Hz, 1H), 7.25 (s, 1H), 7.23 (t,  $J$  = 8.2 Hz, 1H), 7.15 (t,  $J$  = 7.5 Hz, 1H), 5.92 (m, 1H), 5.31 (dd,  $J$  = 17.3, 1.5 Hz, 1H), 5.25 (dd,  $J$  = 10.5, 1.4 Hz, 1H), 4.58 (m, 3H), 4.20 (dd,  $J$  = 9.6, 4.9 Hz, 1H), 3.82 (d,  $J$  = 16.9 Hz, 1H), 3.72 (d,  $J$  = 16.9 Hz, 1H), 3.29 (dd,  $J$  = 14.6, 6.9 Hz, 1H), 3.19 (dd,  $J$  = 14.7, 7.8 Hz, 1H), 2.67 (p,  $J$  = 2.0 Hz, 1H), 2.40 (t,  $J$  = 7.4 Hz, 2H), 1.95 (s, 2H), 1.80 (m, 1H), 1.63 (m, 3H), 1.32 (m, 2H)

**<sup>13</sup>C NMR (151 MHz, 10% DMSO-*d*<sub>6</sub>/D<sub>2</sub>O)  $\delta$**  176.6, 176.1, 174.4, 174.1, 171.2, 136.1, 131.9, 126.9, 124.3, 121.9, 119.3, 118.3, 111.9, 109.1, 65.7, 55.0, 53.3, 42.6, 33.6, 30.5, 26.9, 24.5, 23.7, 21.8.

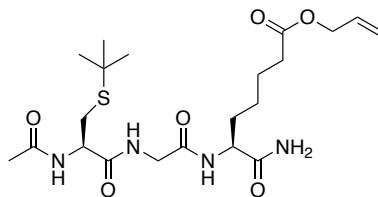

Purification: Peptide was purified on preparative HPLC using a focused gradient of 5-40 % MeCN/H<sub>2</sub>O 0.1% TFA over 30 min at room temperature. Product eluted at 22.8 min. Obtained 7.9  $\mu$ mole (16 % yield) as determined by NMR.

Analytical HPLC Gradient 5-40% MeCN/H<sub>2</sub>O (0.1% TFA) at 60 °C over 30 min (blue 214 nm, red 254 nm). Product eluted at 24.0 min.

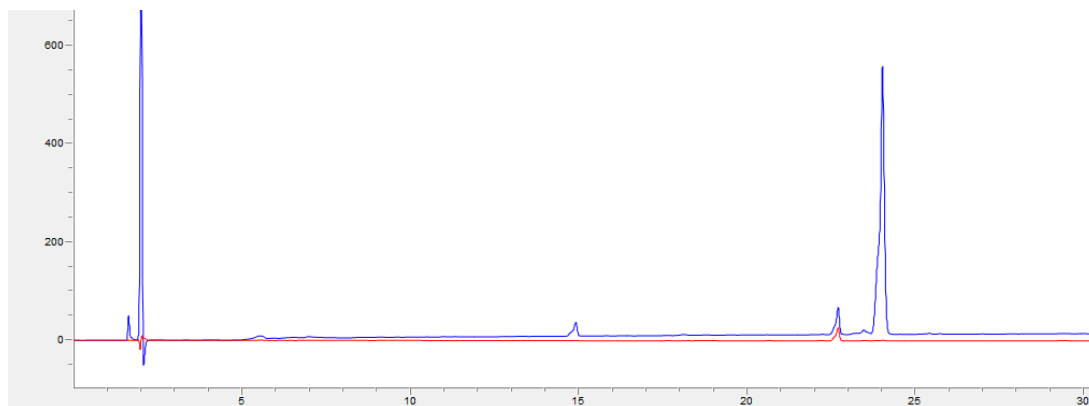

HRMS (ESI-TOF)  $m/z$ :  $[M + H]^+$  Calc'd for C<sub>21</sub>H<sub>37</sub>N<sub>3</sub>N<sub>4</sub>O<sub>6</sub>S 473.2356; Found 473.2430

**<sup>1</sup>H NMR (600 MHz, 5% D<sub>2</sub>O/CD<sub>3</sub>OD)  $\delta$**  5.91 (m, 1H), 5.28 (dd,  $J$  = 17.2, 1.6 Hz, 1H), 5.19 (dd,  $J$  = 10.4, 1.5 Hz, 1H), 4.55 (d,  $J$  = 5.6 Hz, 2H), 4.37 (dd,  $J$  = 8.1, 6.2 Hz, 1H), 4.31 (dd,  $J$  = 9.5, 4.8 Hz, 1H), 3.94 (d,  $J$  = 16.7 Hz, 1H), 3.79 (d,  $J$  = 16.7 Hz, 1H), 2.98 (dd,  $J$  = 12.9, 6.2 Hz, 1H), 2.84 (dd,  $J$  = 12.9, 8.1 Hz, 1H), 2.35 (t,  $J$  = 7.4 Hz, 2H), 1.99 (s, 3H), 1.84 (m, 1H), 1.69 (m, 1H), 1.62 (m, 2H), 1.38 (m, 2H), 1.32 (s, 9H).

**<sup>13</sup>C NMR (151 MHz, 5% D<sub>2</sub>O/CD<sub>3</sub>OD)  $\delta$**  175.5, 173.5, 172.34, 172.27, 170.1, 132.4, 116.9, 64.7, 54.5, 53.0, 42.4, 42.1, 33.3, 31.2, 29.9, 29.3, 25.0, 24.1, 21.1.

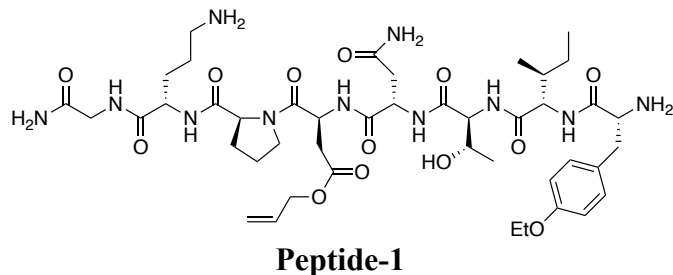

Purification: Peptide was purified on preparative HPLC using a focused gradient of 5-40% MeCN/H<sub>2</sub>O 0.1% TFA over 30 min at 60 °C. Product eluted at 20.6 min.

Analytical HPLC Gradient 2-60% MeCN/H<sub>2</sub>O (0.1% TFA) at 60 °C over 30 min (blue 214 nm, red 254 nm). Product eluted at 18.0 min.

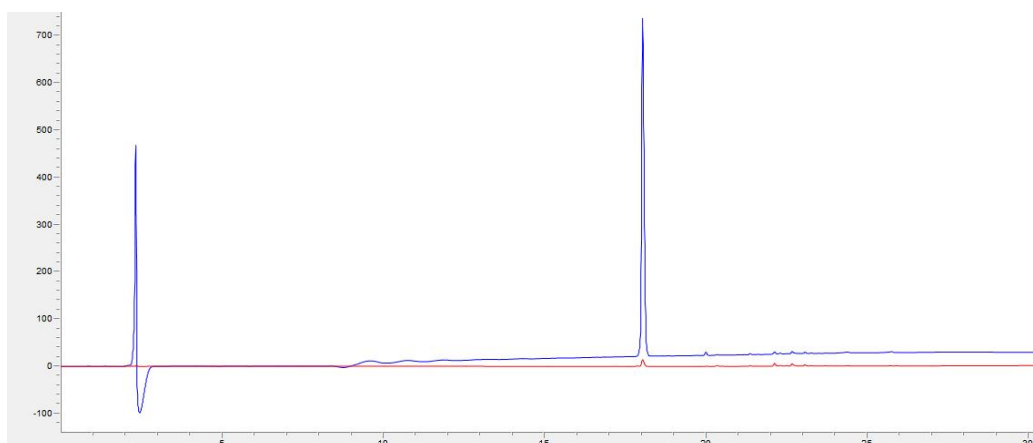

HRMS (ESI-TOF)  $m/z$ :  $[M + H]^+$  Calc'd for C<sub>44</sub>H<sub>70</sub>N<sub>11</sub>O<sub>13</sub> 960.5155; Found 960.5143

**<sup>1</sup>H NMR (600 MHz, 90% H<sub>2</sub>O+D<sub>2</sub>O)  $\delta$**  8.46 (m, 2.7 H), 8.37 (m, 1.8 H), 8.28 (d,  $J = 7.8$  Hz, 1.0 H), 7.58 (s, 0.9 H), 7.46 (s, 0.7 H), 7.21 (d,  $J = 8.8$  Hz, 2.2 H), 7.07 (s, 0.6 H), 6.99 (d,  $J = 8.7$  Hz, 2.1 H), 6.86 (s, 0.6 H), 5.94 (m, 0.8 H), 5.32 (m, 1.7 H), 5.02 (q,  $J = 7.3$  Hz, 1.0 H), 4.62 (d,  $J = 5.6$  Hz, 1.6 H), 4.41 (dd,  $J = 8.7, 4.8$  Hz, 1.0 H), 4.32 (m, 2.1 H), 4.22 (dd,  $J = 10.1, 5.8$  Hz, 1.2 H), 4.16 (m, 1.1 H), 4.11 (q,  $J = 7.1$  Hz, 2.3 H), 3.96 (t,  $J = 7.4$  Hz, 1.3 H), 3.91 (dd,  $J = 5.9, 3.7$  Hz, 2.0 H), 3.72 (td,  $J = 6.8, 2.6$  Hz, 2.0 H), 3.23 (dd,  $J = 13.4, 5.8$  Hz, 1.1 H), 3.02 (m, 3.5 H), 2.95 (dd,  $J = 16.6, 6.6$  Hz, 1.1 H), 2.78 (m, 1.7 H), 2.72 (m, 1.6 H), 2.27 (m, 1.1 H), 2.01 (m, 2.1 H), 1.94 (m, 2.2 H), 1.76 (m, 3.5 H), 1.56 (m, 1.1 H), 1.37 (t,  $J = 7.0$  Hz, 3.2 H), 1.18 (d,  $J = 6.5$  Hz, 3.09 H), 0.96 (m, 1.1 H), 0.70 (m, 7.5 H).

**<sup>13</sup>C NMR (151 MHz, 90% H<sub>2</sub>O+D<sub>2</sub>O)  $\delta$**  174.34, 174.26, 173.9, 173.7, 171.8, 171.5, 171.2, 169.9, 169.4, 157.6, 131.6, 130.6, 126.4, 118.6, 115.3, 67.1, 66.3, 64.4, 60.8, 59.2, 58.8, 54.7, 53.4, 50.4, 48.4, 48.0, 42.2, 39.1, 36.3, 36.1, 35.9, 35.4, 29.4, 27.6, 24.5, 24.4, 23.4, 18.8, 14.5, 13.9, 10.1.

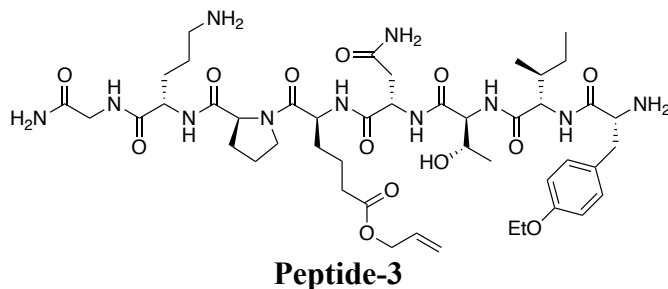

Purification: Peptide was purified on preparative HPLC using a focused gradient of 5-40% MeCN/H<sub>2</sub>O 0.1% TFA over 30 min at 60 °C. Product eluted at 20.7 min.

Analytical HPLC Gradient 2-60% MeCN/H<sub>2</sub>O (0.1% TFA) at 60 °C over 30 min (blue 214 nm, red 254 nm). Product eluted at 19.1 min.

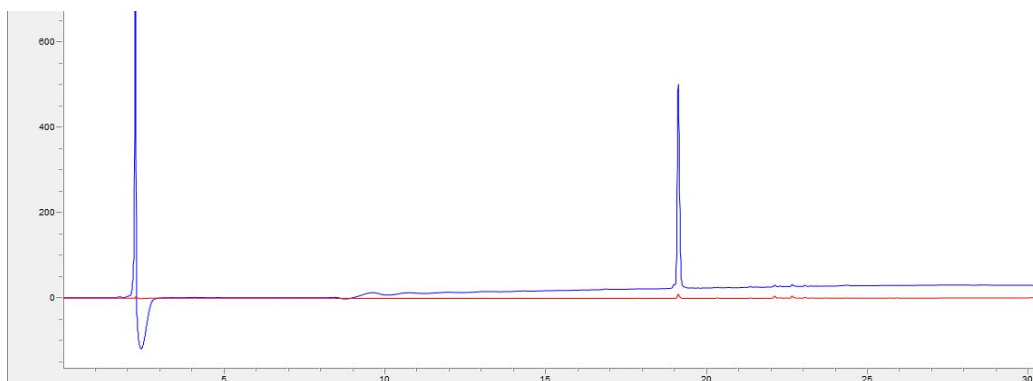

HRMS (ESI-TOF) m/z: [M + H]<sup>+</sup> Calc'd for C<sub>46</sub>H<sub>74</sub>N<sub>11</sub>O<sub>13</sub> 988.5468; Found 988.5446

**<sup>1</sup>H NMR (600 MHz, 90% H<sub>2</sub>O+D<sub>2</sub>O) δ** 8.58 (d, *J* = 6.7 Hz, 0.9 H), 8.45 (m, 1.8 H), 8.36 (d, *J* = 6.9 Hz, 1.0 H), 8.28 (d, *J* = 7.6 Hz, 1.0 H), 8.21 (d, *J* = 6.9 Hz, 0.9 H), 7.57 (s, 1.0 H), 7.47 (s, 0.9 H), 7.23 (d, *J* = 8.8 Hz, 2.2 H), 7.07 (s, 0.9 H), 6.99 (d, *J* = 8.8 Hz, 2.2H), 6.86 (s, 0.9H), 5.96 (m, 0.7 H), 5.31 (m, 2.3 H), 4.62 (d, *J* = 5.6 Hz, 1.6 H), 4.56 (m, 0.5 H), 4.41 (dd, *J* = 8.4, 5.9 Hz, 1.0 H), 4.32 (m, 2.1 H), 4.23 (dd, *J* = 10.2, 5.9 Hz, 1.1 H), 4.16 (m, 1.1 H), 4.11 (q, *J* = 7.0 Hz, 2.3 H), 3.95 (t, *J* = 7.4 Hz, 1.3 H), 3.92 (m, 2.1 H), 3.80 (dt, *J* = 10.4, 6.7 Hz, 1.1 H), 3.62 (dt, *J* = 10.6, 7.1 Hz, 1.1 H), 3.24 (dd, *J* = 13.6, 5.9 Hz, 1.2 H), 3.02 (m, 3.6 H), 2.79 (dd, *J* = 15.6, 5.6 Hz, 1.2 H), 2.70 (dd, *J* = 15.5, 8.0 Hz, 1.1 H), 2.46 (m, 2.1 H), 2.30 (m, 1.2 H), 2.02 (m, 2.6 H), 1.90 (m, 2.5 H), 1.85 – 1.62 (m, 8.1 H), 1.57 (m, 1.3 H), 1.37 (t, *J* = 7.0 Hz, 3.4 H), 1.18 (d, *J* = 6.5 Hz, 3.4 H), 0.95 (m, 1.2 H), 0.76 – 0.67 (m, 7.8 H).

**<sup>13</sup>C NMR (151 MHz, 90% H<sub>2</sub>O+D<sub>2</sub>O) δ** 175.6, 174.4, 174.3, 174.0, 173.7, 171.6, 171.8, 171.2, 169.5, 157.6, 131.9, 130.6, 126.4, 118.4, 115.3, 67.1, 65.8, 64.4, 60.5, 59.2, 58.9, 54.7, 53.4, 51.6, 50.3, 47.9, 42.2, 39.1, 36.1, 35.9, 33.1, 29.4, 27.7, 24.7, 24.4, 23.4, 20.4, 18.8, 14.6, 13.9, 10.1.

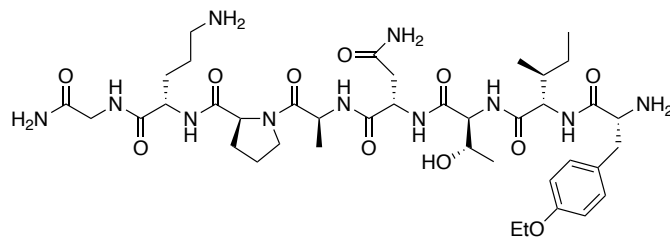

Purification: Peptide was purified on preparative HPLC using a focused gradient of 5-40% MeCN/H<sub>2</sub>O 0.1% TFA over 30 min at 60 °C. Product eluted at 15.8 min.

Analytical HPLC Gradient 2-60% MeCN/H<sub>2</sub>O (0.1% TFA) at 60 °C over 30 min (blue 214 nm, red 254 nm). Product eluted at 16.8 min.

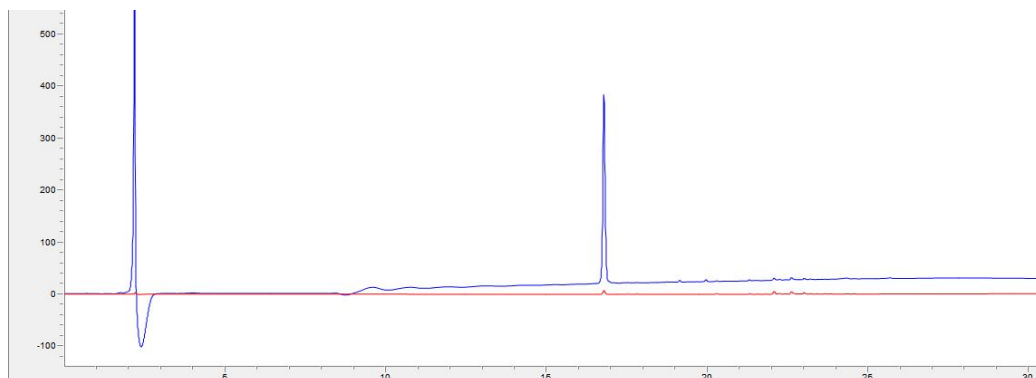

HRMS (ESI-TOF)  $m/z$ :  $[M + Na]^+$  Calc'd for C<sub>40</sub>H<sub>65</sub>N<sub>11</sub>O<sub>11</sub>Na 898.4763; Found 898.4763

**<sup>1</sup>H NMR (600 MHz, 90% H<sub>2</sub>O+D<sub>2</sub>O)  $\delta$**  8.60 (d,  $J = 7.0$  Hz, 0.9 H), 8.48 (d,  $J = 7.8$  Hz, 0.8 H), 8.45 (t,  $J = 5.9$  Hz, 1.0 H), 8.37 (d,  $J = 7.0$  Hz, 0.9 H), 8.31 (d,  $J = 7.8$  Hz, 1.0 H), 8.21 (d,  $J = 5.9$  Hz, 0.9 H), 7.58 (s, 1.0 H), 7.47 (s, 0.8 H), 7.22 (d,  $J = 8.2$  Hz, 2.1 H), 7.08 (s, 0.9 H), 6.99 (d,  $J = 8.4$  Hz, 2.1 H), 6.87 (s, 0.8H), 4.57 (m, 1.6 H), 4.41 (m, 1.4 H), 4.33 (m, 2.3 H), 4.22 (m, 1.2 H), 4.16 (m, 1.0 H), 4.12 (q,  $J = 7.2$  Hz, 2.3 H), 3.97 (t,  $J = 7.1$  Hz, 1.3 H), 3.92 (m, 2.0 H), 3.79 (m, 1.0 H), 3.64 (m, 1.0 H), 3.23 (dd,  $J = 13.5, 6.5$  Hz, 1.1 H), 3.02 (m, 3.3 H), 2.78 (dd,  $J = 15.9, 5.4$  Hz, 1.1 H), 2.70 (dd,  $J = 15.8, 8.2$  Hz, 1.1 H), 2.39 (q,  $J = 7.0$  Hz, 0.5 H), 2.30 (dq,  $J = 15.0, 7.1$  Hz, 1.1 H), 2.02 (m, 2.6 H), 1.90 (m, 2.2 H), 1.76 (m, 3.7 H), 1.57 (m, 1.3 H), 1.37 (t,  $J = 7.0$  Hz, 3.3 H), 1.33 (d,  $J = 7.0$  Hz, 2.7 H), 1.19 (d,  $J = 6.5$  Hz, 3.2 H), 0.95 (s, 1.2 H), 0.70 (m, 7.4 H).



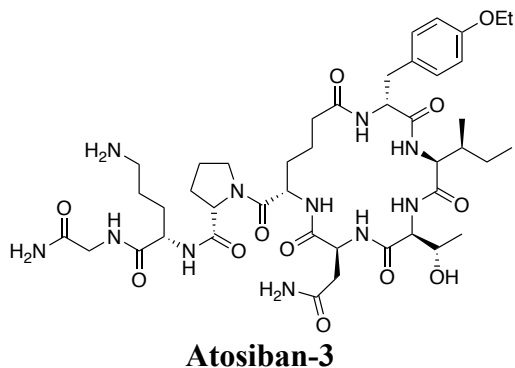

Purification: Peptide was purified on preparative HPLC using a focused gradient of 10-30% MeCN/H<sub>2</sub>O 0.1% TFA over 30 min at 60 °C. Product eluted at 22.4 min. Obtained 2.28 μmole of peptide as determined by NMR.

Analytical HPLC Gradient 5-40% MeCN/H<sub>2</sub>O (0.1% TFA) at 60 °C over 30 min (blue 214 nm, red 254 nm). Product eluted at 20.3 min.

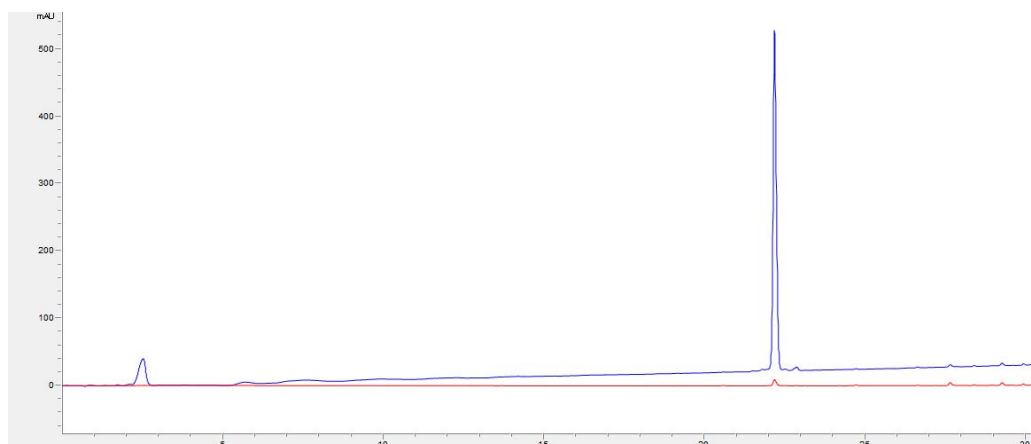

HRMS (ESI-TOF)  $m/z$ :  $[M + H]^+$  Calc'd for C<sub>43</sub>H<sub>68</sub>N<sub>11</sub>O<sub>12</sub> 930.5049; Found 930.5059

**<sup>1</sup>H NMR (600 MHz, 90% H<sub>2</sub>O/D<sub>2</sub>O)** δ 8.63 (d,  $J$  = 6.9 Hz, 0.9 H), 8.48 (d,  $J$  = 6.6 Hz, 1 H), 8.45 (m, 1.8 H), 8.07 (dd,  $J$  = 10.7, 7.6 Hz, 1.7H), 7.79 (d,  $J$  = 8.1 Hz, 0.9H), 7.62 (s, 1.5 H), 7.49 (s, 0.6 H), 7.22 (d,  $J$  = 8.8 Hz, 2.1 H), 7.09 (s, 0.7 H), 6.96 (d,  $J$  = 8.8 Hz, 2.2 H), 6.90 (s, 0.5 H), 4.63 (m, 0.9H), 4.55 (m, 0.7 H), 4.47 (m, 1.0 H), 4.41 (m, 2.0 H), 4.35 (m, 1.0 H), 4.19 (m, 1.1 H), 4.10 (m, 3.2 H), 3.93 (dd,  $J$  = 5.9, 2.0 Hz, 2.1 H), 3.77 (m, 1.0 H), 3.64 (dt,  $J$  = 10.3, 7.0 Hz, 1.0 H), 3.05 (m, 3.4 H), 2.93 (dd,  $J$  = 13.4, 10.1 Hz, 1.1 H), 2.88 (dd,  $J$  = 15.5, 6.4 Hz, 1.2 H), 2.77 (dd,  $J$  = 15.6, 7.9 Hz, 1.0 H), 2.29 (m, 3.3 H), 2.03 (m, 2.5 H), 1.91 (m, 2.3 H), 1.86 – 1.71 (m, 6.8 H), 1.61 (t,  $J$  = 7.7 Hz, 2.0 H), 1.36 (t,  $J$  = 7.0 Hz, 3.2H), 1.16 (d,  $J$  = 6.3 Hz, 3.3H), 1.03 (m, 1.1 H), 0.81 (m, 1.1 H), 0.75 (t,  $J$  = 7.2 Hz, 3.3 H), 0.52 (d,  $J$  = 6.9 Hz, 3.1 H).

**<sup>13</sup>C NMR (151 MHz, D<sub>2</sub>O)** δ 176.2, 174.8, 174.4, 173.9, 173.9, 173.8, 173.5, 171.8, 171.6, 170.8, 157.1, 130.4, 128.7, 115.1, 66.9, 64.5, 60.5, 58.8, 58.3, 55.7, 53.2, 51.7, 51.2, 48.0, 42.0, 38.8, 35.9, 35.5, 34.8, 34.6, 29.8, 29.3, 27.7, 24.7, 23.7, 23.2, 21.9, 18.6, 14.7, 13.9, 10.9.

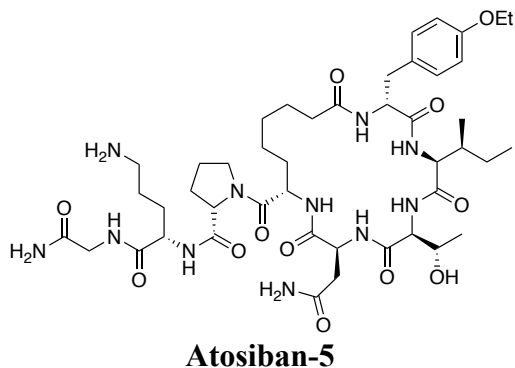

Purification: Peptide was purified on preparative HPLC using a focused gradient of 15-30% MeCN/H<sub>2</sub>O 0.1% TFA over 30 min at 60 °C. Product eluted at 20.0 min. Obtained 1.19 μmole of peptide as determined by NMR.

Analytical HPLC Gradient 5-40% MeCN/H<sub>2</sub>O (0.1% TFA) at 60 °C over 30 min (blue 214 nm, red 254 nm). Product eluted at 20.3 min.

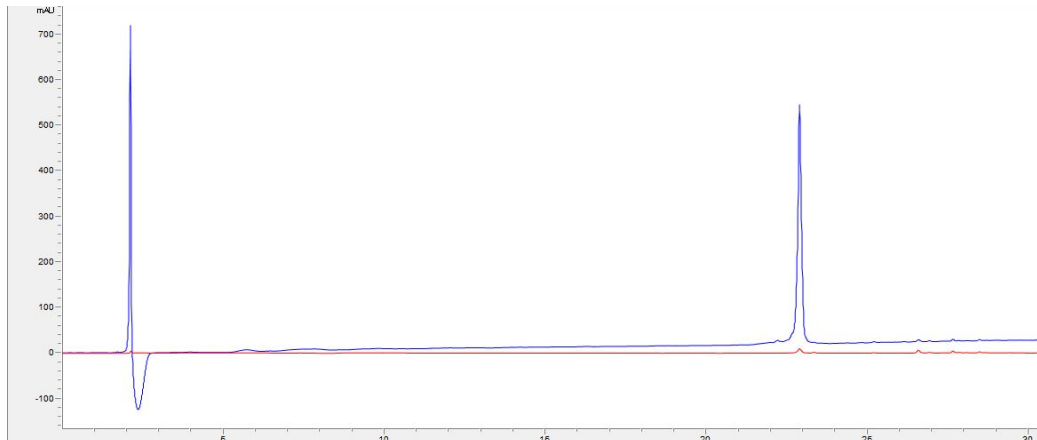

HRMS (ESI-TOF)  $m/z$ :  $[M + H]^+$  Calc'd for C<sub>45</sub>H<sub>72</sub>N<sub>11</sub>O<sub>12</sub> 958.5362; Found 958.5381

**<sup>1</sup>H NMR (600 MHz, 90% H<sub>2</sub>O+D<sub>2</sub>O) δ** 8.59 (d,  $J$  = 6.9 Hz, 0.9 H), 8.49 (d,  $J$  = 6.6 Hz, 0.9 H), 8.45 (t,  $J$  = 5.9 Hz, 1.0 H), 8.39 (d,  $J$  = 6.2 Hz, 0.9 H), 8.01 (m, 1.7 H), 7.82 (d,  $J$  = 7.3 Hz, 0.8 H), 7.60 (s, 1.2 H), 7.48 (s, 0.8 H), 7.22 (d,  $J$  = 8.8 Hz, 2.2 H), 7.08 (s, 0.8 H), 6.95 (d,  $J$  = 8.7 Hz, 2.2 H), 6.90 (s, 0.6 H), 4.61 (m, 1.5 H), 4.57 (m, 0.9 H), 4.41 (m, 1.0 H), 4.34 (m, 1.2 H), 4.27 (m, 1.0 H), 4.20 (m, 2.1 H), 4.10 (q,  $J$  = 7.0 Hz, 2.3 H), 3.92 (dd,  $J$  = 6.1, 2.9 Hz, 2.1H), 3.77 (m, 1.0 H), 3.62 (dt,  $J$  = 10.3, 6.8 Hz, 1.1 H), 3.05 (m, 3.6 H), 2.95 (dd,  $J$  = 13.4, 9.8 Hz, 1.1 H), 2.83 (dd,  $J$  = 15.5, 6.7 Hz, 1.1 H), 2.73 (dd,  $J$  = 15.4, 7.6 Hz, 1.1 H), 2.36 (dd,  $J$  = 14.3, 7.6 Hz, 1.0 H), 2.30 (m, 1.3 H), 2.19 (dt,  $J$  = 14.1, 6.8 Hz, 1.2 H), 2.02 (m, 2.4 H), 1.90 (m, 2.4 H), 1.86 – 1.69 (m, 5.9 H), 1.63 (m, 1.2 H), 1.56 (t,  $J$  = 7.1 Hz, 2.2H), 1.36 (t,  $J$  = 7.0 Hz, 3.7 H), 1.32 (s, 3.0 H), 1.23 (d,  $J$  = 6.5 Hz, 3.5 H), 1.06 (m, 1.1 H), 0.86 (m, 1.2 H), 0.75 (t,  $J$  = 7.4 Hz, 3.4 H), 0.51 (d,  $J$  = 6.9 Hz, 3.0 H).

**<sup>13</sup>C NMR (151 MHz, 90% H<sub>2</sub>O+D<sub>2</sub>O) δ** 177.5, 174.7, 174.5, 174.0, 173.6, 171.8, 171.0, 157.0, 130.4, 128.7, 115.1, 67.3, 64.5, 60.5, 59.3, 58.5, 55.9, 53.3, 51.6, 50.9, 47.8, 42.2, 39.1, 36.1, 35.5, 35.2, 34.9, 30.1, 29.3, 27.8, 27.4, 25.0, 24.7, 23.9, 23.8, 23.3, 19.0, 14.8, 14.0, 11.0.

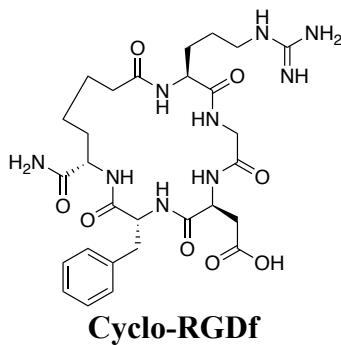

Purification: Peptide was purified on preparative HPLC using a focused gradient of 2-10 % MeCN/H<sub>2</sub>O 0.1% TFA over 30 min at 60 °C. Product eluted at 16.1 min. Obtained 7.54 μmole (15 % yield) of isolated peptide from PyAOP cyclization route as determined by NMR. Obtained 5.9 μmole (24 %) of isolated peptide from photochemical cyclization route as determined by NMR.

Analytical HPLC Gradient 2-25% MeCN/H<sub>2</sub>O (0.1% TFA) at 60 °C over 30 min (blue 214 nm, red 254 nm). Product eluted at 16.9 min.

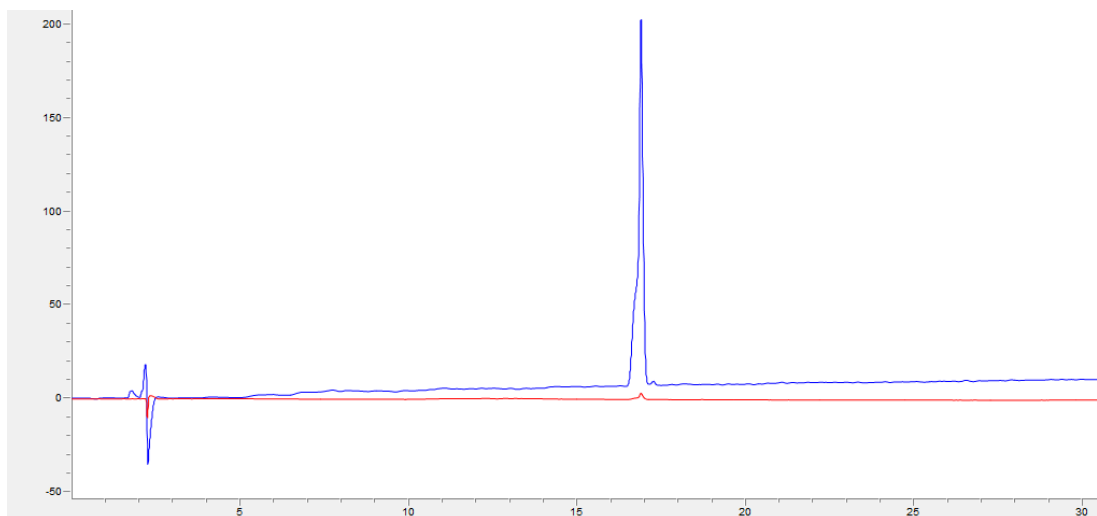

HRMS (ESI-TOF)  $m/z$ :  $[M + H]^+$  Calc'd for C<sub>28</sub>H<sub>42</sub>N<sub>9</sub>O<sub>8</sub> 632.3156; Found 632.3145

**<sup>1</sup>H NMR (600 MHz, 90% H<sub>2</sub>O+D<sub>2</sub>O) δ** 8.41 (d,  $J$  = 7.8 Hz, 3H), 8.32 (t,  $J$  = 5.7 Hz, 1H), 7.83 (d,  $J$  = 6.2 Hz, 1H), 7.56 (s, 1H), 7.37 (t,  $J$  = 7.5 Hz, 2H), 7.31 (t,  $J$  = 7.4 Hz, 1H), 7.26 (d,  $J$  = 8.4 Hz, 2H), 7.18 (t,  $J$  = 5.8 Hz, 1H), 7.08 (s, 1H), 4.64 (m, 1H), 4.51 (q,  $J$  = 6.8 Hz, 1H), 4.22 (m, 2H), 3.97 (dd,  $J$  = 17.0, 5.7 Hz, 1H), 3.88 (dd,  $J$  = 16.9, 5.7 Hz, 1H), 3.34 (dd,  $J$  = 14.1, 5.0 Hz, 1H), 3.20 (q,  $J$  = 6.7 Hz, 2H), 2.94 (dd,  $J$  = 14.1, 10.4 Hz, 1H), 2.56 (d,  $J$  = 6.7 Hz, 2H), 2.34 (m, 2H), 1.90 – 1.70 (m, 5H), 1.70 – 1.54 (m, 4H), 1.37 (m, 2H).

**<sup>13</sup>C NMR (151 MHz, 90% H<sub>2</sub>O+D<sub>2</sub>O) δ** 177.1, 176.9, 174.5, 173.6, 173.4, 172.7, 171.2, 156.9, 136.8, 129.2, 128.7, 127.1, 55.2, 54.7, 54.0, 50.5, 42.5, 40.6, 36.3, 35.2, 34.7, 30.0, 27.2, 24.4, 24.1, 24.0.

## <sup>1</sup>H NMR Assignment of Atosiban Peptides

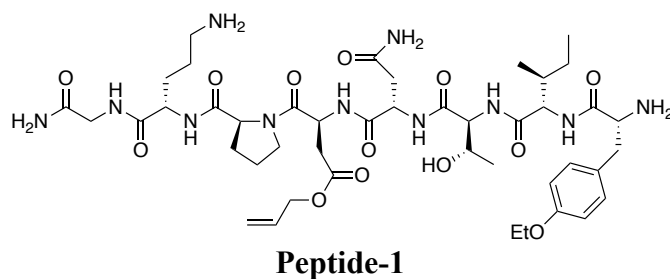

| Amino Acid | $\delta$ , H <sup>N</sup> | <sup>3</sup> J <sub><math>\alpha</math>N</sub> | $\delta$ , H <sub><math>\alpha</math></sub> | $\delta$ , H <sub><math>\beta</math></sub> | $\delta$ , H <sub><math>\gamma</math></sub> | $\delta$ , H <sub><math>\delta</math></sub> | Other                                                                                                  |
|------------|---------------------------|------------------------------------------------|---------------------------------------------|--------------------------------------------|---------------------------------------------|---------------------------------------------|--------------------------------------------------------------------------------------------------------|
| Gly        | 8.37                      | <sup>a</sup> -                                 | 3.91                                        | N/A                                        | N/A                                         | N/A                                         | N/A                                                                                                    |
| Orn        | 8.46                      | <sup>a</sup> -                                 | 4.36                                        | 1.93 / 1.81                                | 1.93 / 1.81                                 | 3.03                                        | N/A                                                                                                    |
| Pro        | N/A                       | N/A                                            | 4.42                                        | 2.31                                       | 2.02, 1.94                                  | 3.73                                        | N/A                                                                                                    |
| Asp(Allyl) | 8.45                      | <sup>a</sup> -                                 | 4.69                                        | 2.75                                       | N/A                                         | N/A                                         | 5.94, 5.32, 4.63                                                                                       |
| Asn        | 8.46                      | <sup>a</sup> -                                 | 5.03                                        | 2.96, 2.77                                 | N/A                                         | N/A                                         | N/A                                                                                                    |
| Thr        | 8.28                      | 7.8                                            | 4.33                                        | 4.16                                       | 1.18 ( <i>J</i> = 6.5)                      | N/A                                         | N/A                                                                                                    |
| Ile        | 8.37                      | <sup>a</sup> -                                 | 3.97                                        | 1.58                                       | 0.97, 0.72<br>0.72                          | 0.72                                        | N/A                                                                                                    |
| D-Tyr(Oet) | N/A                       | <sup>a</sup> -                                 | 4.36                                        | 3.23, 3.02                                 | N/A                                         | N/A                                         | 1.37 ( <i>J</i> = 7.0)<br>4.11 ( <i>J</i> = 7.1)<br>6.99, ( <i>J</i> = 8.7)<br>7.21, ( <i>J</i> = 8.8) |

**Table 1.** Proton assignments for above peptide using TOCSY data for chemical shifts. Data was recorded in 50 mM sodium phosphate (pH 4.0), 100  $\mu$ M TSP, 90% H<sub>2</sub>O/D<sub>2</sub>O or 100% D<sub>2</sub>O, at 298.1 K. <sup>a</sup>Coupling values were not obtained due to spectral overlap.

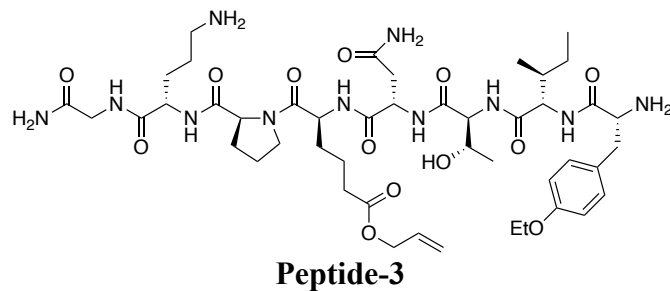

| Amino Acid | $\delta$ , H <sup>N</sup> | $^3J_{\alpha N}$ | $\delta$ , H $_{\alpha}$ | $\delta$ , H $_{\beta}$ | $\delta$ , H $_{\gamma}$ | $\delta$ , H $_{\delta}$ | Other                                                                                  |
|------------|---------------------------|------------------|--------------------------|-------------------------|--------------------------|--------------------------|----------------------------------------------------------------------------------------|
| Gly        | 8.44                      | <sup>a</sup> -   | 3.91                     | N/A                     | N/A                      | N/A                      | N/A                                                                                    |
| Orn        | 8.57                      | 6.7              | 4.33                     | 1.91 / 1.81             | 1.91 / 1.81              | 3.02                     | N/A                                                                                    |
| Pro        | N/A                       | N/A              | 4.41                     | 2.30                    | 2.03, 1.90               | 3.80, 3.65               | N/A                                                                                    |
| Asp(Allyl) | 8.21                      | 6.9              | 4.58                     | 2.43                    | 1.68                     | 1.81                     | 5.97, 5.33, 4.62                                                                       |
| Asn        | 8.44                      | <sup>a</sup> -   | 4.73                     | 2.79, 2.71              | N/A                      | N/A                      | N/A                                                                                    |
| Thr        | 8.28                      | 7.6              | 4.33                     | 4.16                    | 1.19 ( $J = 6.4$ )       | N/A                      | N/A                                                                                    |
| Ile        | 8.36                      | 6.9              | 3.96                     | 1.56                    | 0.96, 0.72<br>0.71       | 0.71                     | N/A                                                                                    |
| D-Tyr(OEt) | N/A                       | N/A              | 4.23                     | 3.24, 3.02              | N/A                      | N/A                      | 1.38 ( $J = 7.0$ )<br>4.12 ( $J = 7.0$ )<br>7.00, ( $J = 8.8$ )<br>7.22, ( $J = 8.7$ ) |

**Table 2.** Proton assignments for above peptide using TOCSY data for chemical shifts. Data was recorded in 50 mM sodium phosphate (pH 4.0), 100  $\mu$ M TSP, 90% H<sub>2</sub>O/D<sub>2</sub>O or 100% D<sub>2</sub>O, at 298.1 K. <sup>a</sup>Coupling values were not obtained due to spectral overlap.

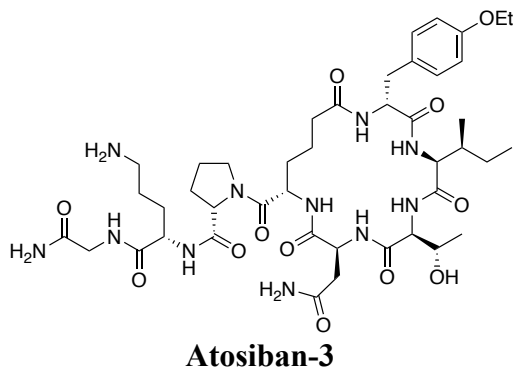

| Amino Acid | $\delta$ , H <sup>N</sup> | <sup>3</sup> J <sub><math>\alpha</math>N</sub> | $\delta$ , H <sub><math>\alpha</math></sub> | $\delta$ , H <sub><math>\beta</math></sub> | $\delta$ , H <sub><math>\gamma</math></sub> | $\delta$ , H <sub><math>\delta</math></sub> | Other                                                                                |
|------------|---------------------------|------------------------------------------------|---------------------------------------------|--------------------------------------------|---------------------------------------------|---------------------------------------------|--------------------------------------------------------------------------------------|
| Gly        | 8.45                      | <sup>a</sup> -                                 | 3.93                                        | N/A                                        | N/A                                         | N/A                                         | N/A                                                                                  |
| Orn        | 8.63                      | 6.9                                            | 4.36                                        | 1.93 / 1.82                                | 1.93 / 1.82                                 | 3.04                                        | N/A                                                                                  |
| Pro        | N/A                       | N/A                                            | 4.42                                        | 2.31                                       | 2.03, 1.91                                  | 3.77, 3.64                                  | N/A                                                                                  |
| Linker     | 8.07                      | 7.2                                            | 4.55                                        | 2.29                                       | 1.63                                        | 1.80, 1.77                                  | N/A                                                                                  |
| Asn        | 8.48                      | 6.6                                            | 4.47                                        | 2.87, 2.77                                 | N/A                                         | N/A                                         | N/A                                                                                  |
| Thr        | 7.79                      | 8.1                                            | 4.41                                        | 4.18                                       | 1.17 ( <i>J</i> = 6.4)                      | N/A                                         | N/A                                                                                  |
| Ile        | 8.06                      | 8.1                                            | 4.12                                        | 1.83                                       | 1.04,<br>0.52 ( <i>J</i> = 6.9)             | 0.75 ( <i>J</i> = 6.9)                      | N/A                                                                                  |
| D-Tyr(OEt) | 8.43                      | <sup>a</sup> -                                 | 4.60                                        | 3.05, 2.93                                 | N/A                                         | N/A                                         | 1.36 ( <i>J</i> = 7.0)<br>4.11<br>6.96, ( <i>J</i> = 8.7)<br>7.22, ( <i>J</i> = 8.6) |

**Table 3.** Proton assignments for above peptide using TOCSY data for chemical shifts. Data was recorded in 50 mM sodium phosphate (pH 4.0), 100  $\mu$ M TSP, 90% H<sub>2</sub>O/D<sub>2</sub>O or 100% D<sub>2</sub>O, at 298.1 K. <sup>a</sup>Coupling values were not obtained due to spectral overlap.

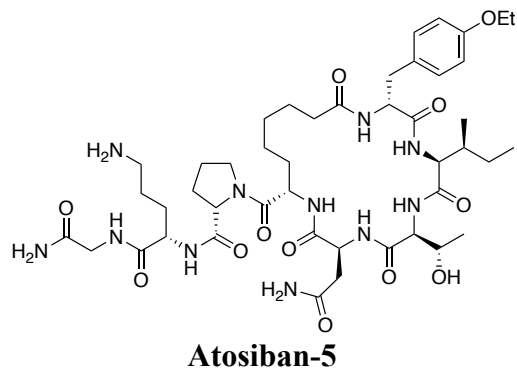

| Amino Acid | $\delta$ , H <sup>N</sup> | $^3J_{\alpha N}$ | $\delta$ , H $\alpha$ | $\delta$ , H $\beta$ | $\delta$ , H $\gamma$          | $\delta$ , H $\delta$ | Other                                                                           |
|------------|---------------------------|------------------|-----------------------|----------------------|--------------------------------|-----------------------|---------------------------------------------------------------------------------|
| Gly        | 8.44                      | 6.0              | 3.92                  | N/A                  | N/A                            | N/A                   | N/A                                                                             |
| Orn        | 8.59                      | 6.9              | 4.35                  | 1.93 / 1.81          | 1.93 / 1.81                    | 3.04                  | N/A                                                                             |
| Pro        | N/A                       | N/A              | 4.41                  | 2.30                 | 2.02, 1.91                     | 3.77, 3.62            | N/A                                                                             |
| Linker     | 8.49                      | 6.6              | 4.57                  | 1.74, 1.64           | 1.56                           | 1.31                  | 2.35, 2.20                                                                      |
| Asn        | 8.00                      | 7.3              | 4.61                  | 2.83, 2.73           | N/A                            | N/A                   | N/A                                                                             |
| Thr        | 7.82                      | 7.5              | 4.28                  | 4.20                 | 1.24 ( $J=6.5$ )               | N/A                   | N/A                                                                             |
| Ile        | 8.01                      | 8.7              | 4.21                  | 1.84                 | 1.08, 0.86<br>0.52 ( $J=6.7$ ) | 0.76 ( $J=7.4$ )      | N/A                                                                             |
| D-Tyr(Oet) | 8.39                      | 6.2              | 4.63                  | 3.04, 2.95           | N/A                            | N/A                   | 1.37 ( $J=7.0$ )<br>4.10, ( $J=7.1$ )<br>6.95, ( $J=8.8$ )<br>7.22, ( $J=8.7$ ) |

**Table 4.** Proton assignments for above peptide using TOCSY data for chemical shifts. Data was recorded in 50 mM sodium phosphate (pH 4.0), 100  $\mu$ M TSP, 90% H<sub>2</sub>O/D<sub>2</sub>O or 100% D<sub>2</sub>O, at 298.1 K.

# <sup>1</sup>H NMR Spectra of Peptides

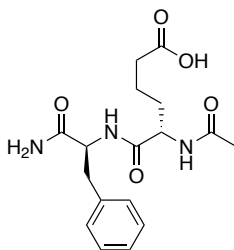

## <sup>1</sup>H NMR (600 MHz)

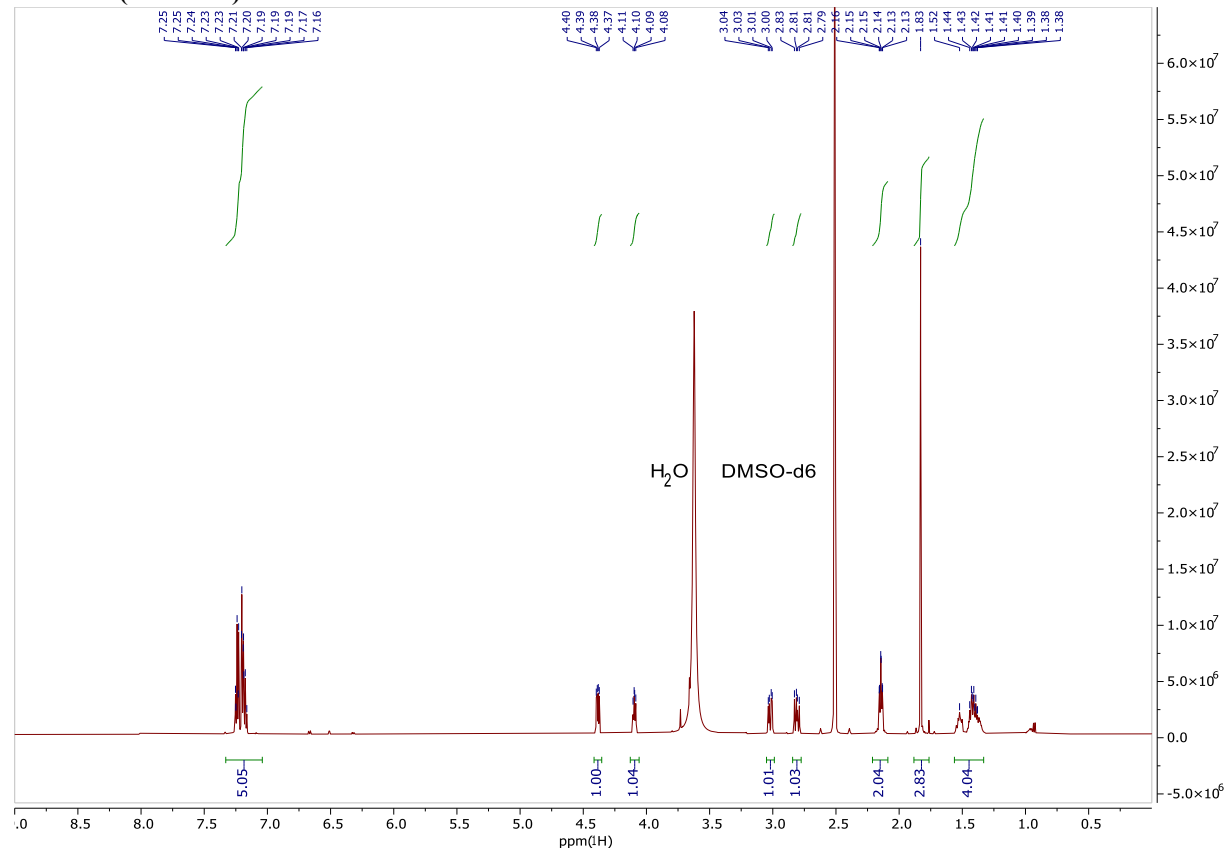

<sup>1</sup>H NMR of above peptide in 5% D<sub>2</sub>O/DMSO-*d*<sub>6</sub> at 298.1 K.



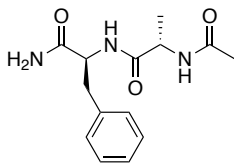

**<sup>1</sup>H NMR (600 MHz)**

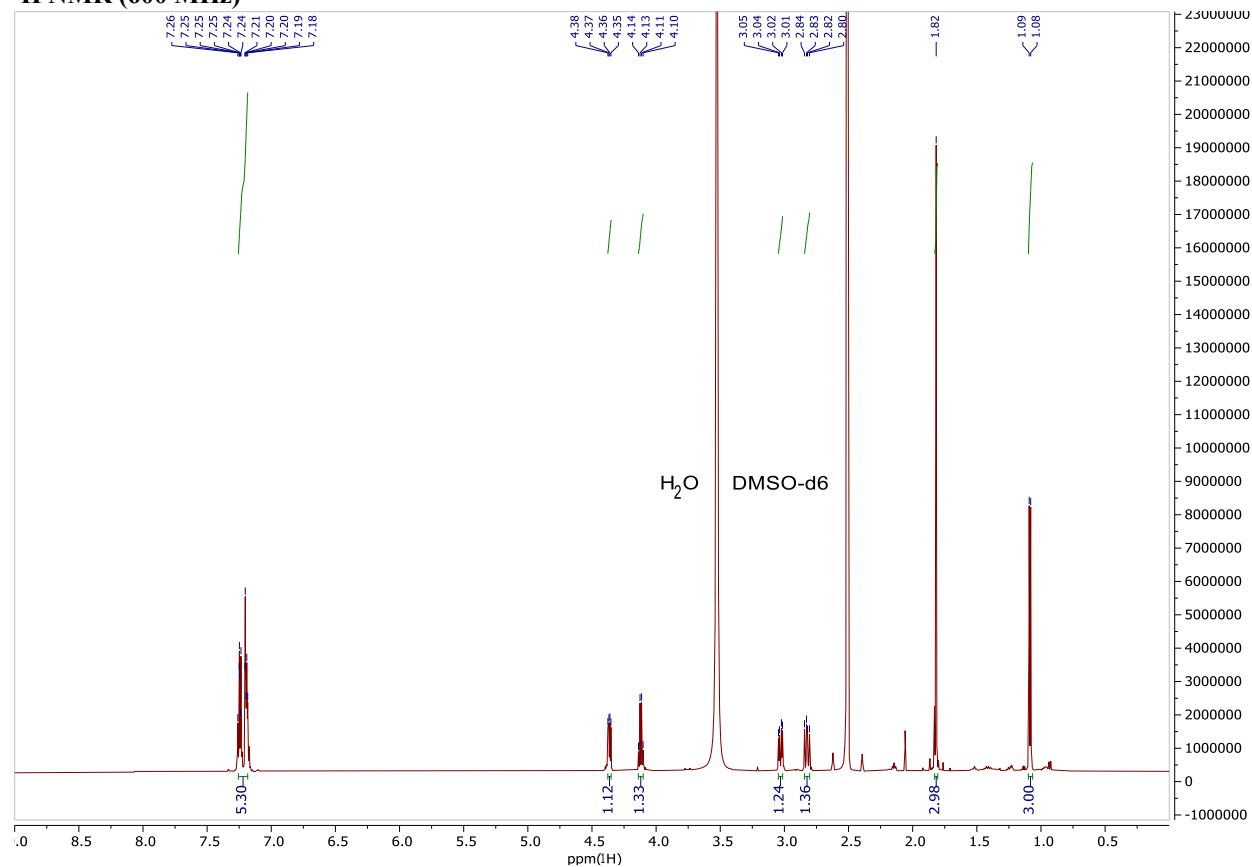

<sup>1</sup>H NMR of above peptide in 5% D<sub>2</sub>O/DMSO-*d*<sub>6</sub> at 298.1 K.

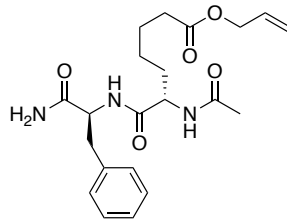

**<sup>1</sup>H NMR (600 MHz)**

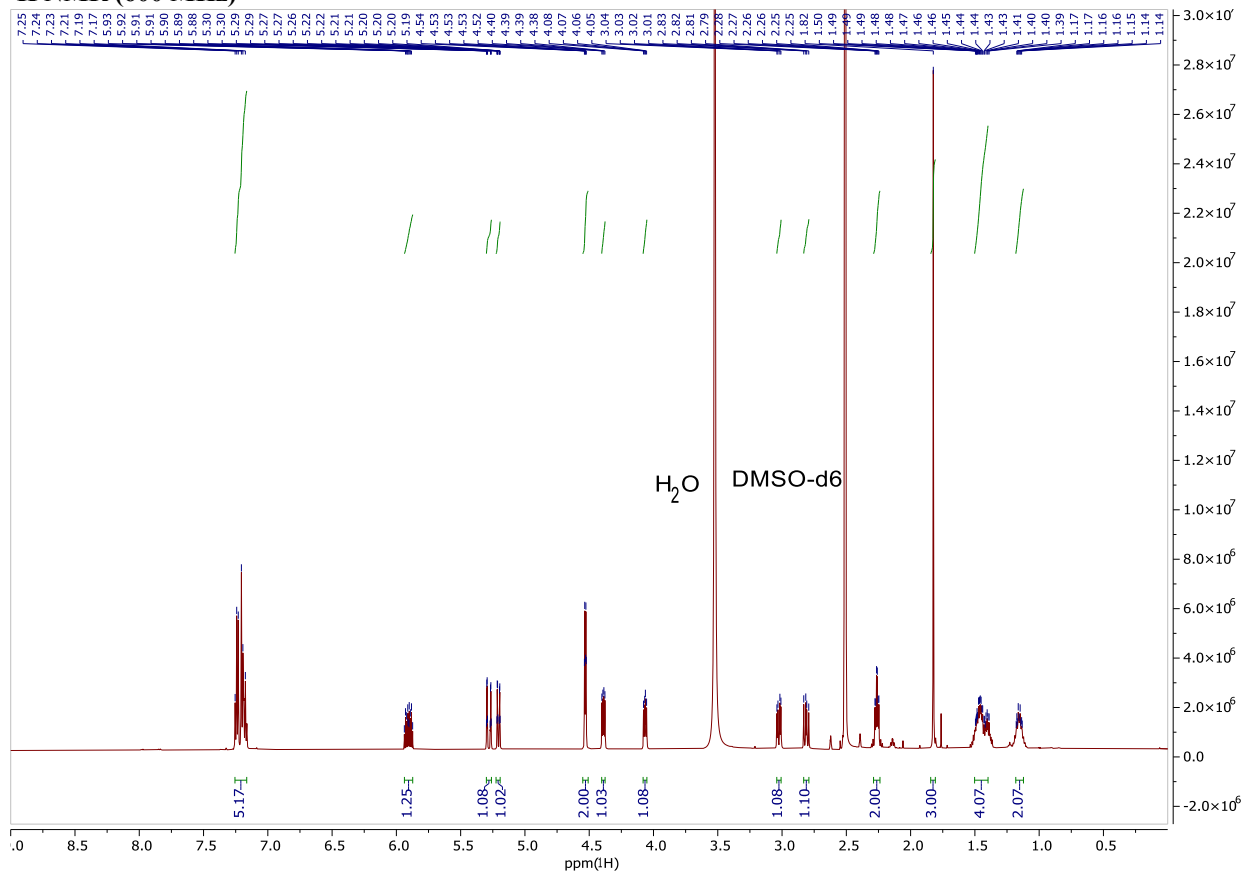

<sup>1</sup>H NMR of above peptide in 5% D<sub>2</sub>O/DMSO-*d*<sub>6</sub> at 298.1 K.

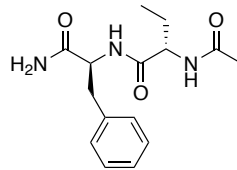

**<sup>1</sup>H NMR (600 MHz)**

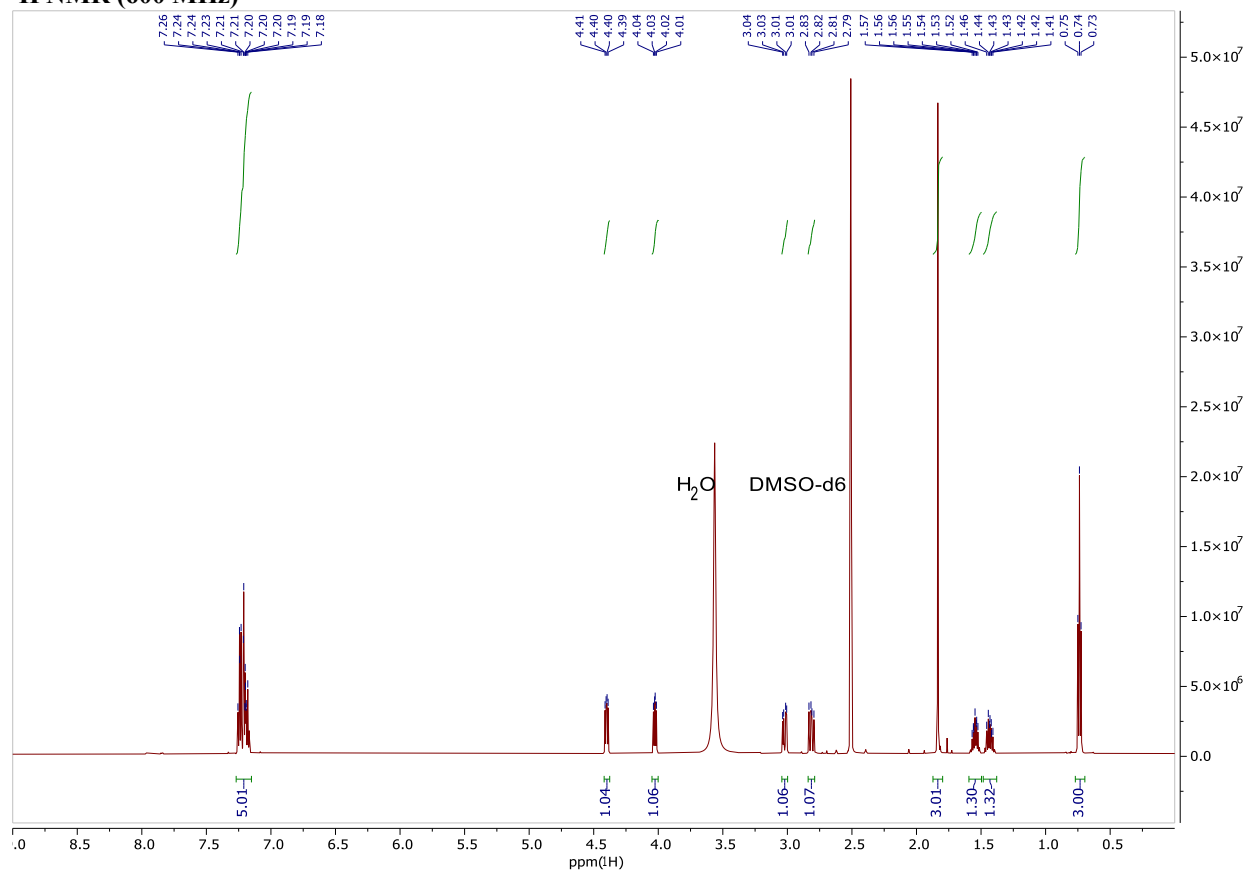

<sup>1</sup>H NMR of above peptide in 5% D<sub>2</sub>O/DMSO-*d*<sub>6</sub> at 298.1 K.

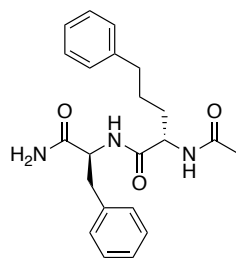

**<sup>1</sup>H NMR (600 MHz)**

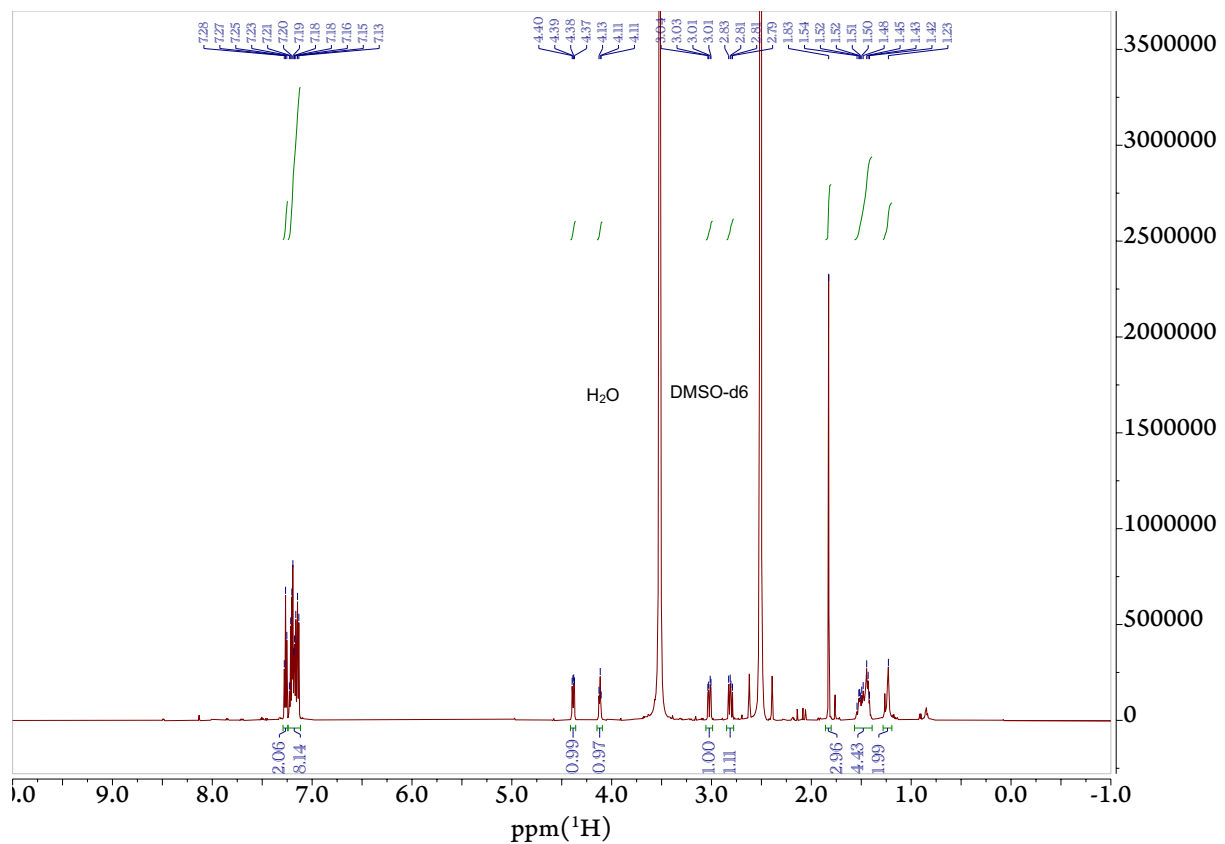

<sup>1</sup>H NMR of above peptide in 5% D<sub>2</sub>O/DMSO-*d*<sub>6</sub> at 298.1 K.

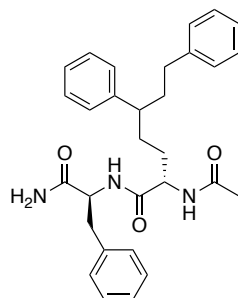

**<sup>1</sup>H NMR (600 MHz)**

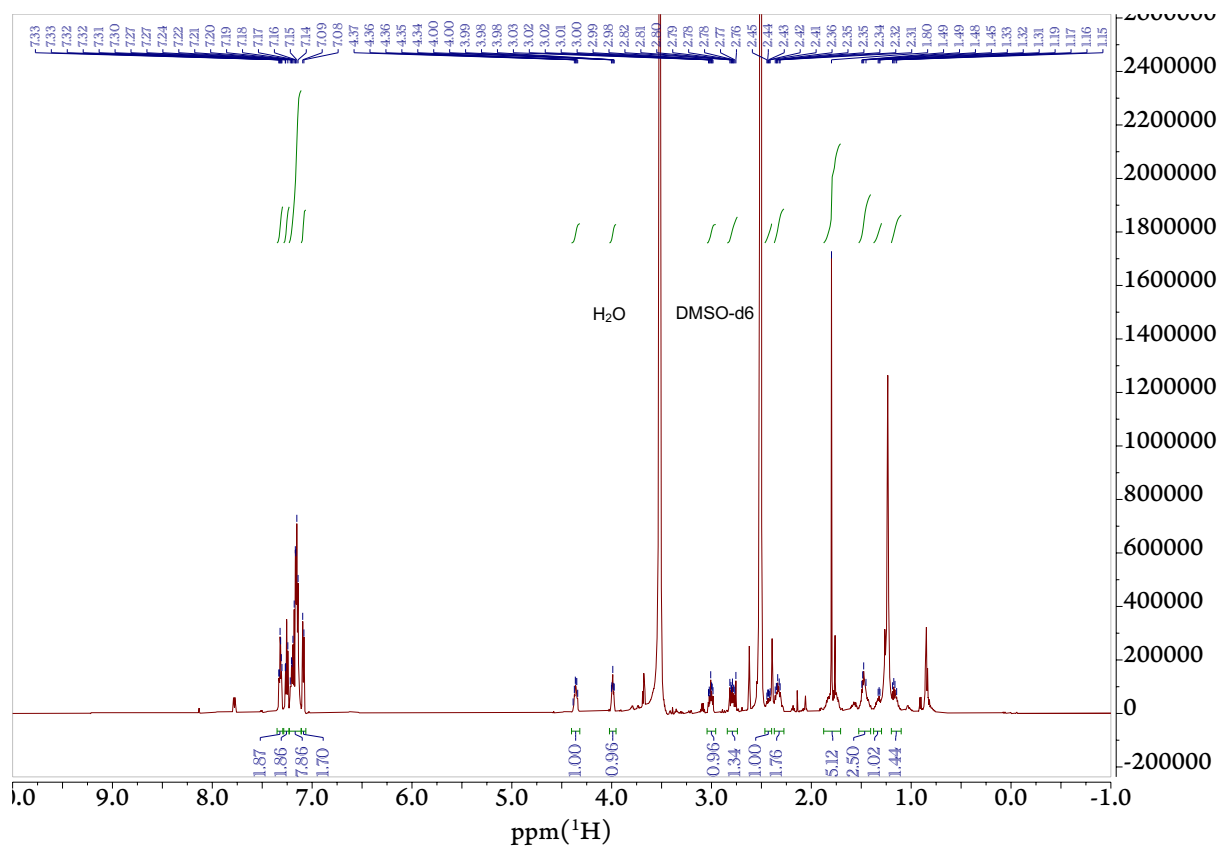

<sup>1</sup>H NMR of above peptide in 5% D<sub>2</sub>O/DMSO-*d*<sub>6</sub> at 298.1 K.

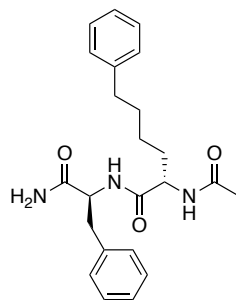

**<sup>1</sup>H NMR (600 MHz)**

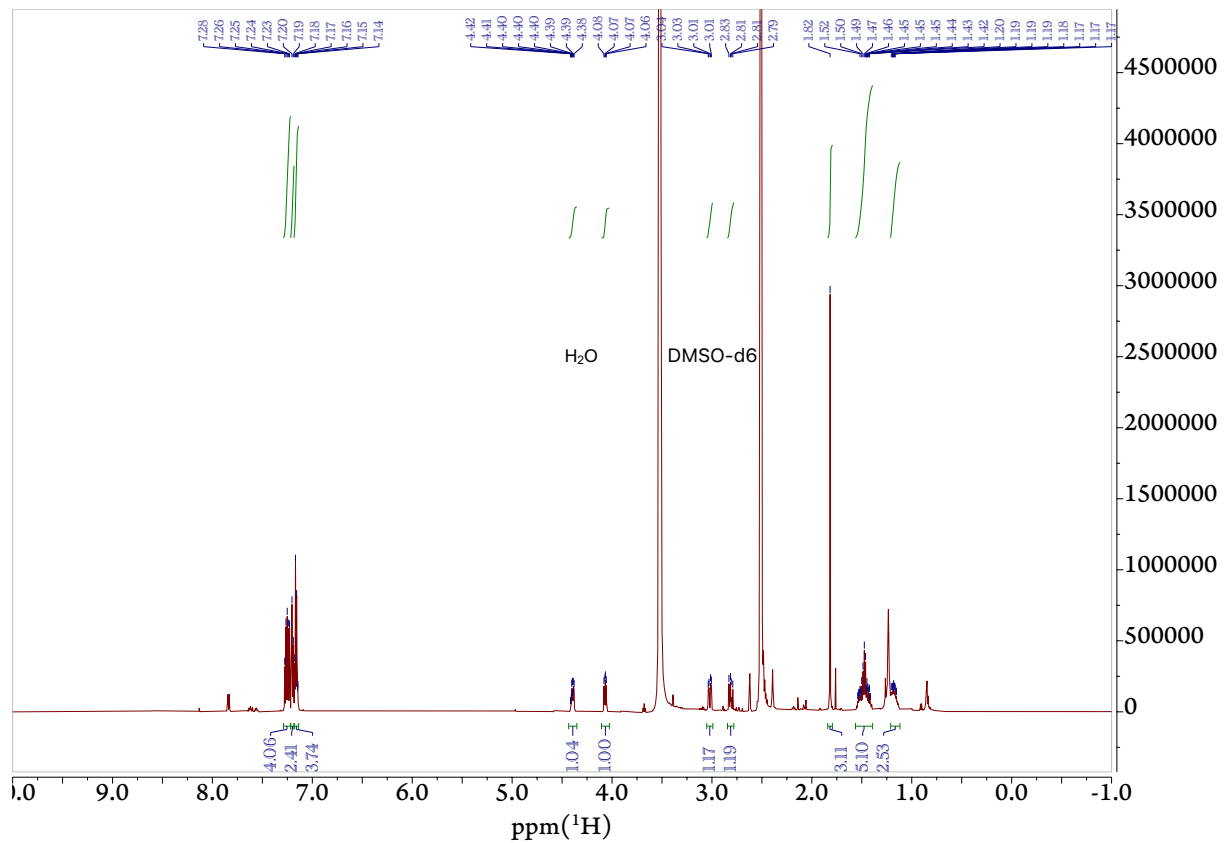

<sup>1</sup>H NMR of above peptide in 5% D<sub>2</sub>O/DMSO-*d*<sub>6</sub> at 298.1 K.

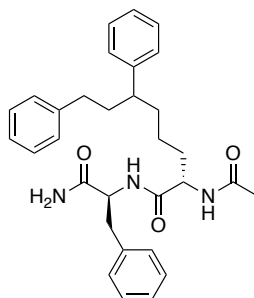

**<sup>1</sup>H NMR (600 MHz)**

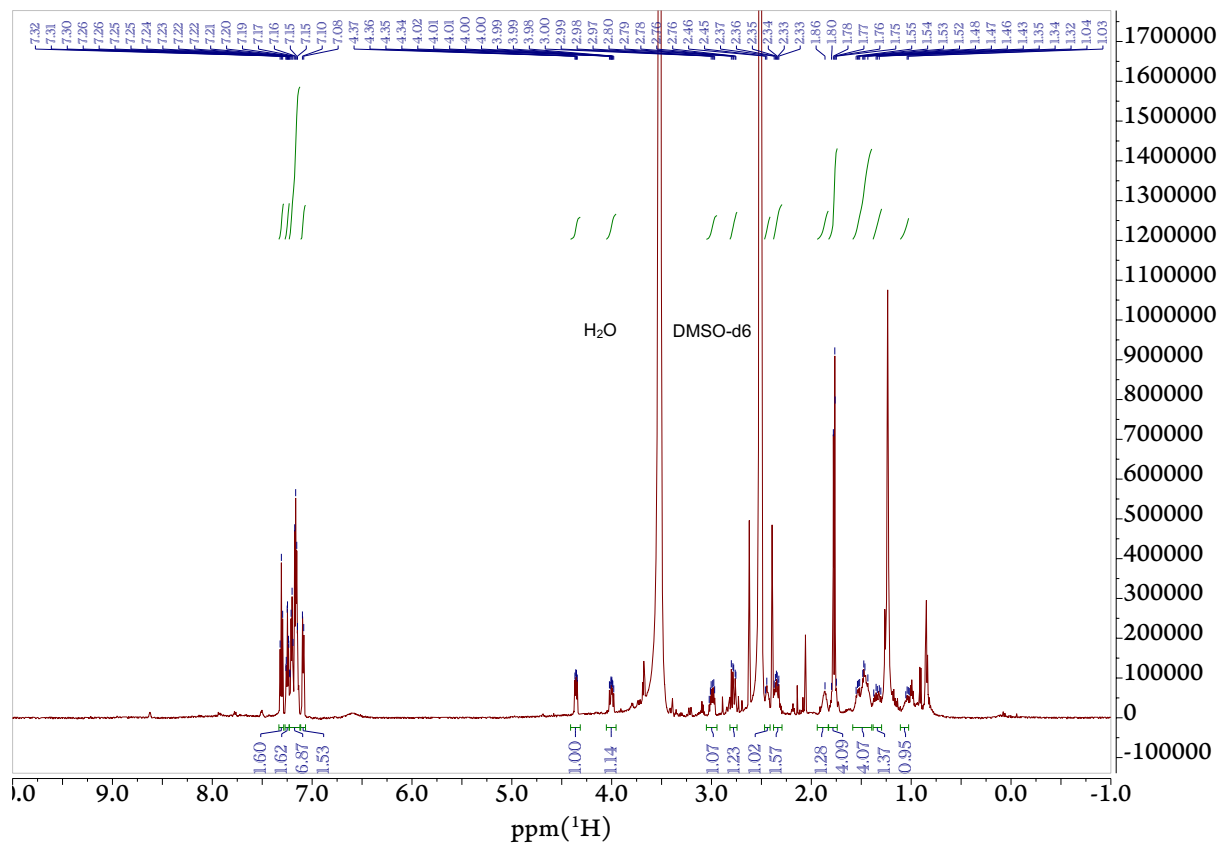

<sup>1</sup>H NMR of above peptide in 5% D<sub>2</sub>O/DMSO-*d*<sub>6</sub> at 298.1 K.

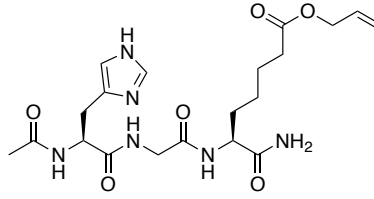

**<sup>1</sup>H NMR (600 MHz)**

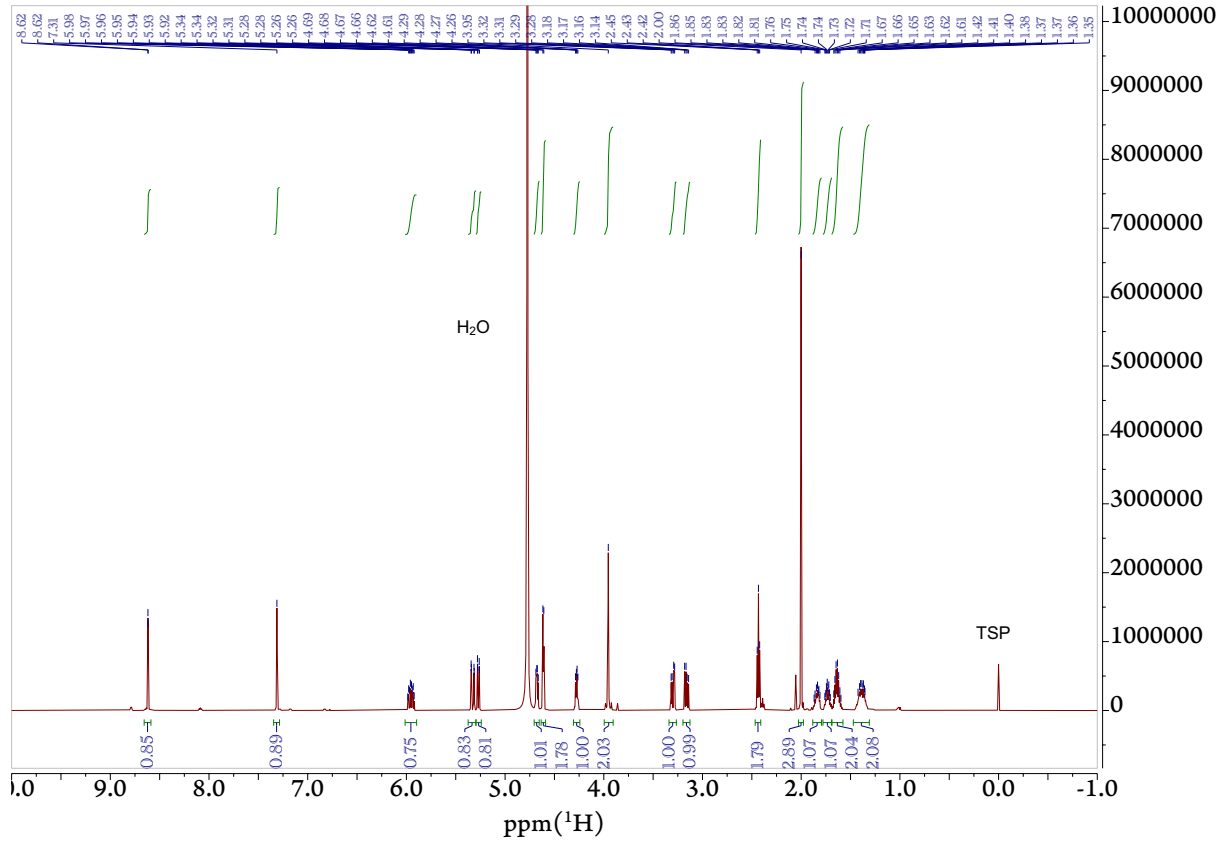

<sup>1</sup>H NMR of above peptide in D<sub>2</sub>O with 100 μM TSP at 298.1 K



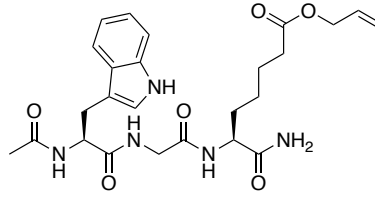

**<sup>1</sup>H NMR (600 MHz)**

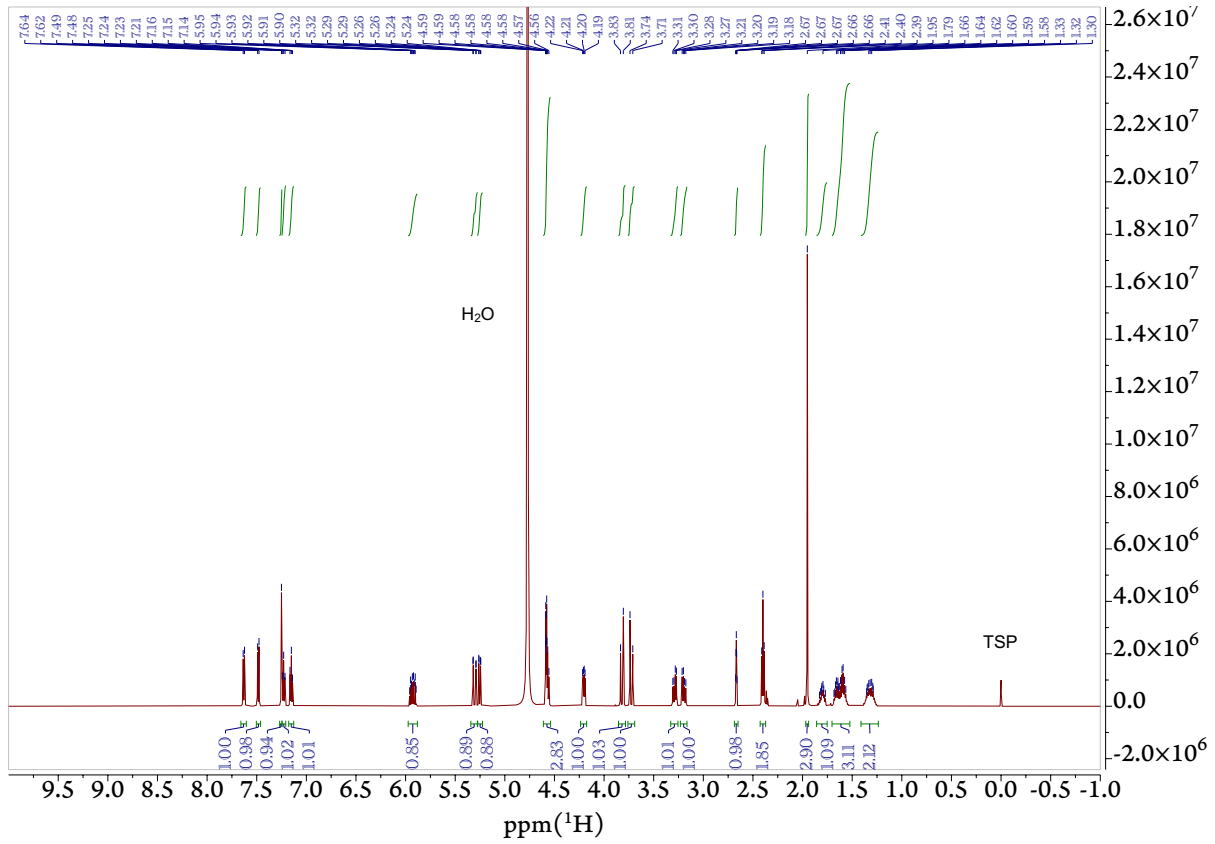

<sup>1</sup>H NMR of above peptide in 10 % DMSO-*d*<sub>6</sub> /D<sub>2</sub>O with 100 μM TSP at 298.1 K.

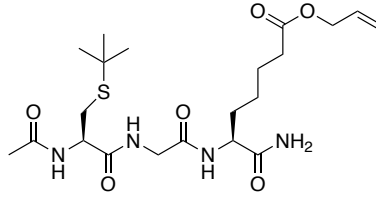

**<sup>1</sup>H NMR (600 MHz)**

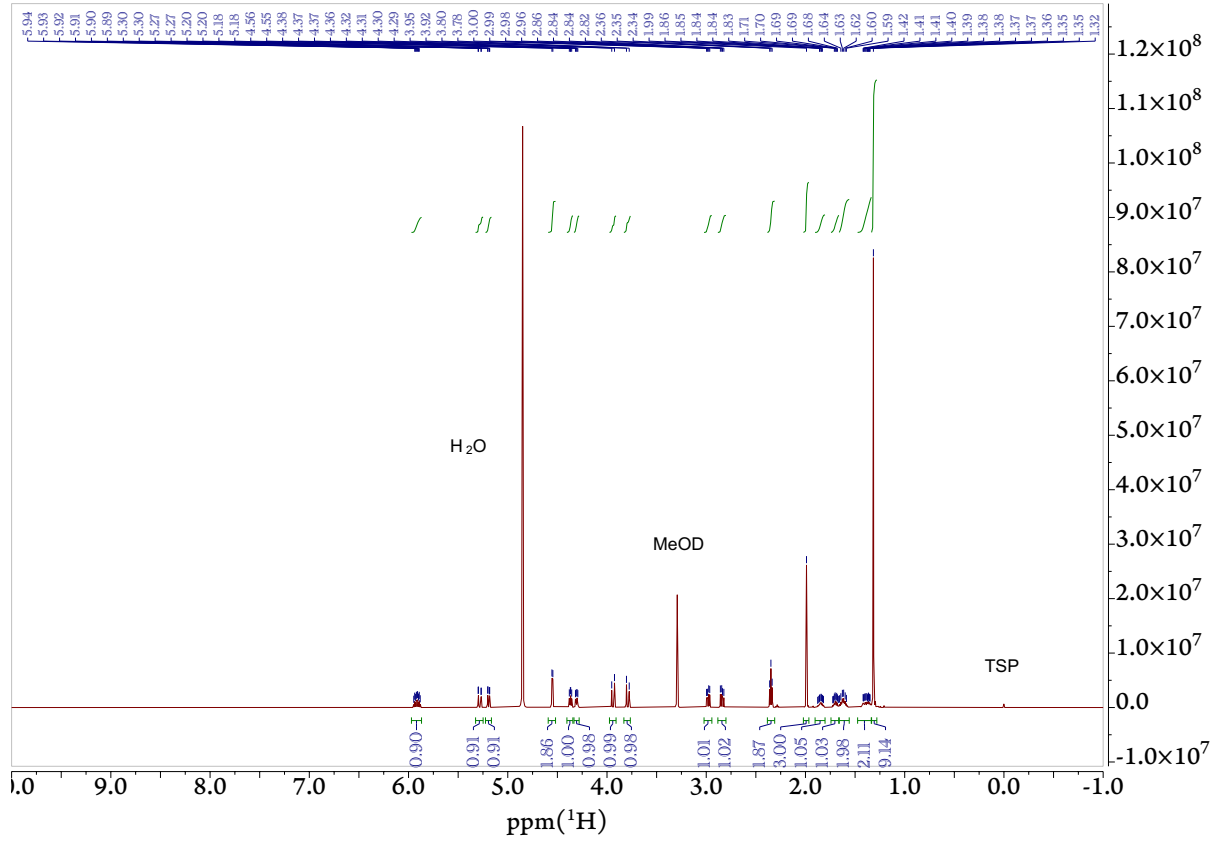

<sup>1</sup>H NMR of above peptide in 5 % D<sub>2</sub>O/CD<sub>3</sub>OD with 100 μM TSP at 298.1 K.

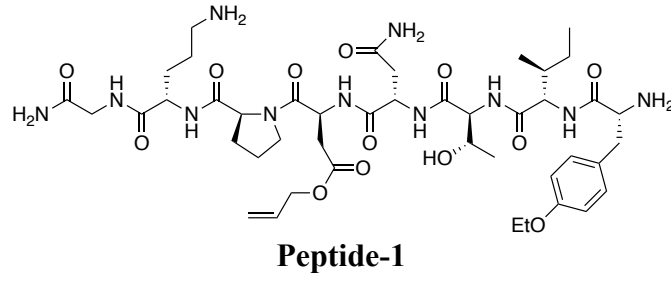

**<sup>1</sup>H NMR (600 MHz)**

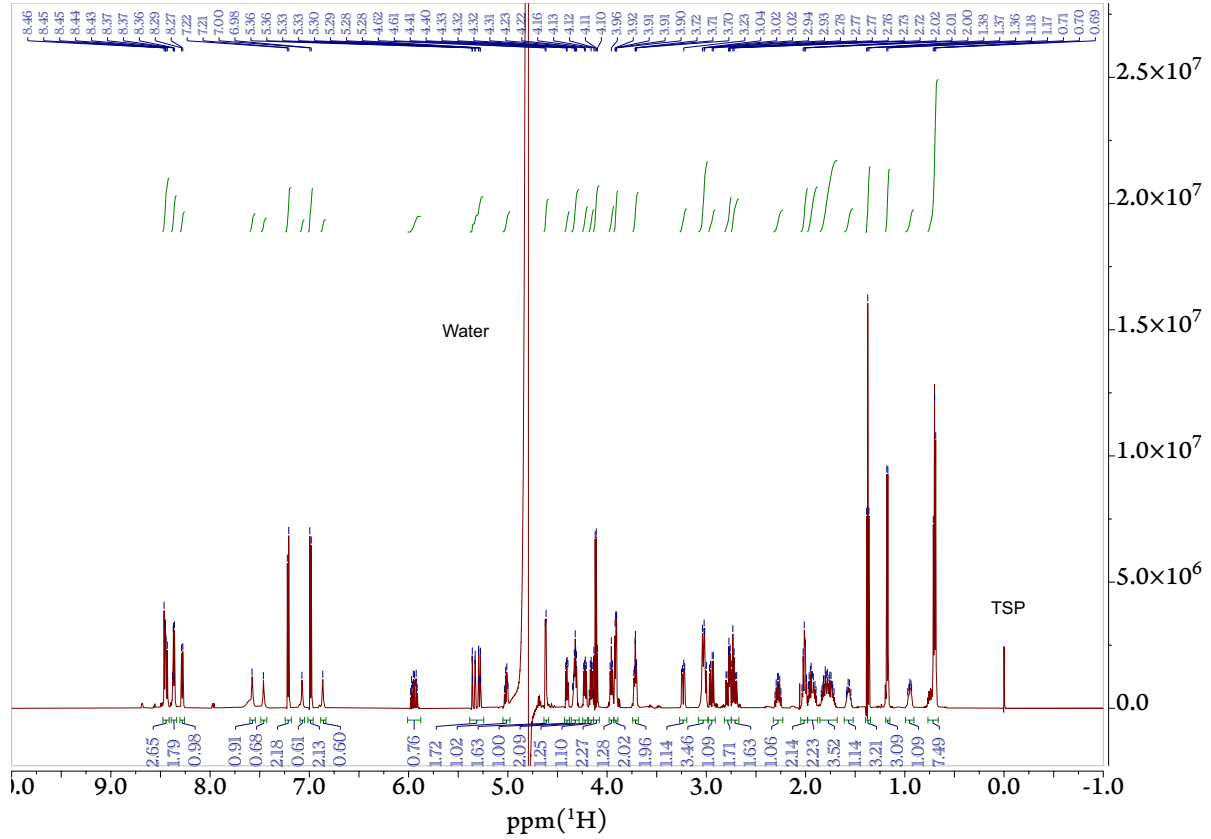

<sup>1</sup>H NMR of above peptide in 50 mM Na<sub>3</sub>PO<sub>4</sub> (pH 4.0), 100 μM TSP, 90% H<sub>2</sub>O/D<sub>2</sub>O, at 298.1 K.



**<sup>1</sup>H NMR (600 MHz)**

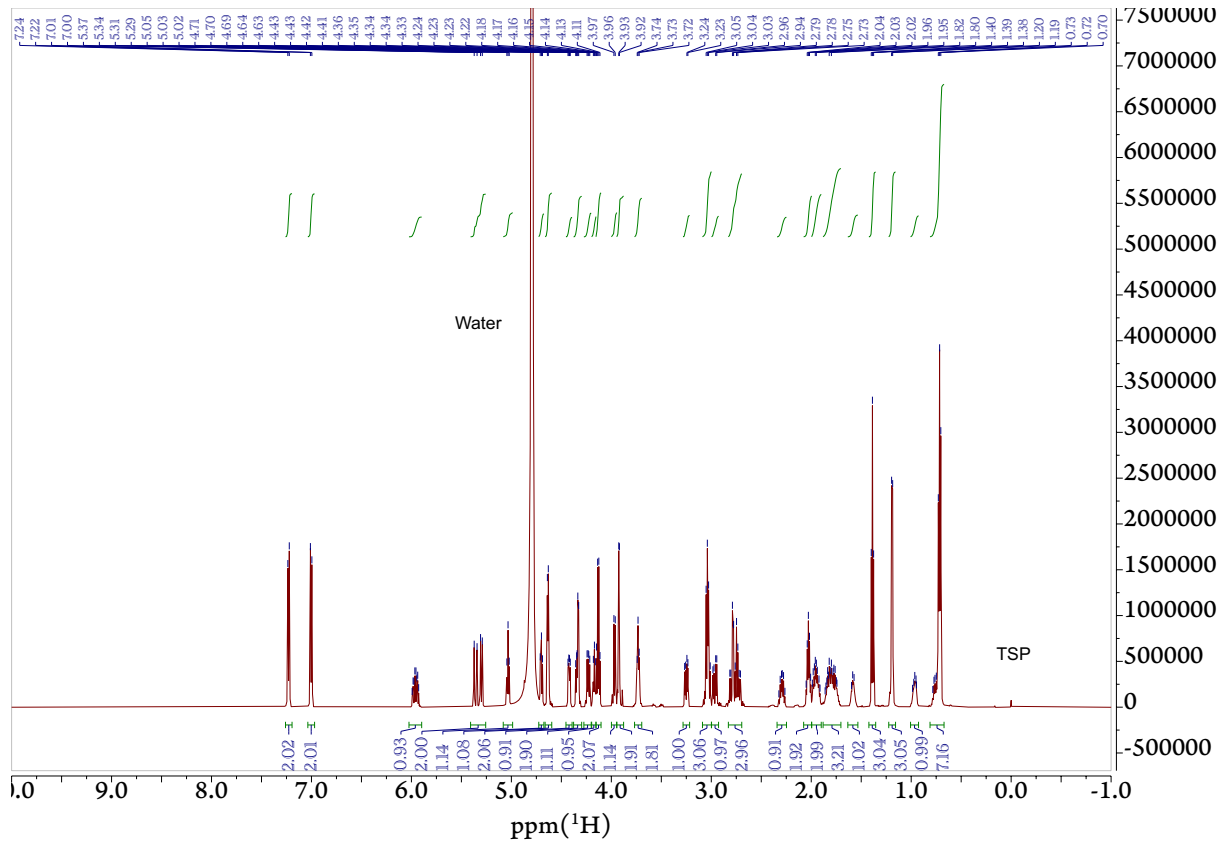

<sup>1</sup>H NMR of above peptide in 50 mM Na<sub>3</sub>PO<sub>4</sub> (pH 4.0), 100 μM TSP, 100% D<sub>2</sub>O, at 298.1 K.



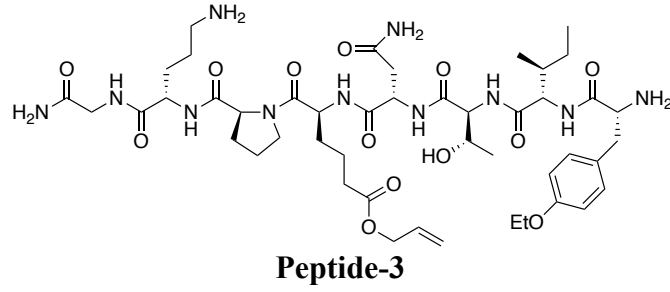

**<sup>1</sup>H NMR (600 MHz)**

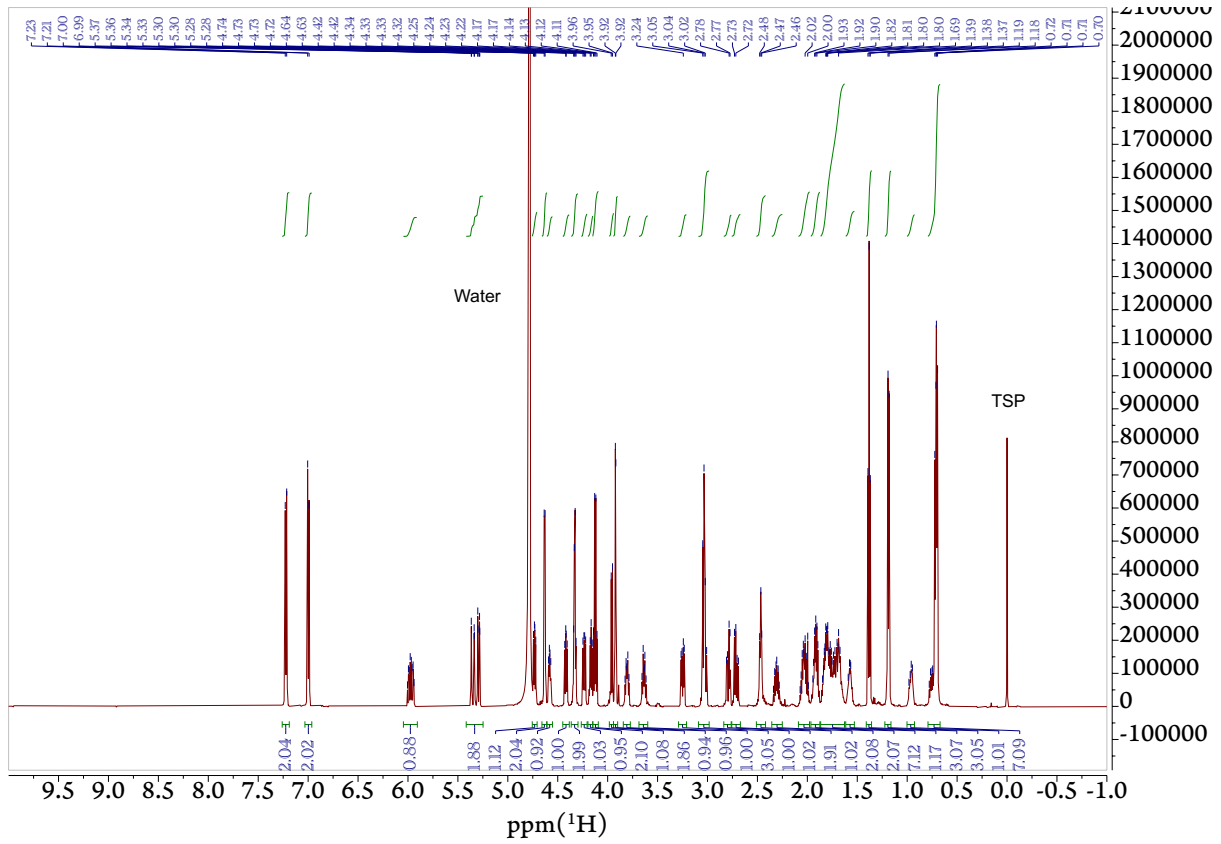

<sup>1</sup>H NMR of above peptide in 50 mM Na<sub>3</sub>PO<sub>4</sub> (pH 4.0), 100 μM TSP, 100% D<sub>2</sub>O, at 298.1 K.

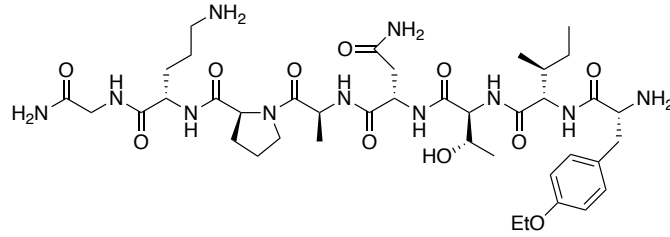

**<sup>1</sup>H NMR (600 MHz)**

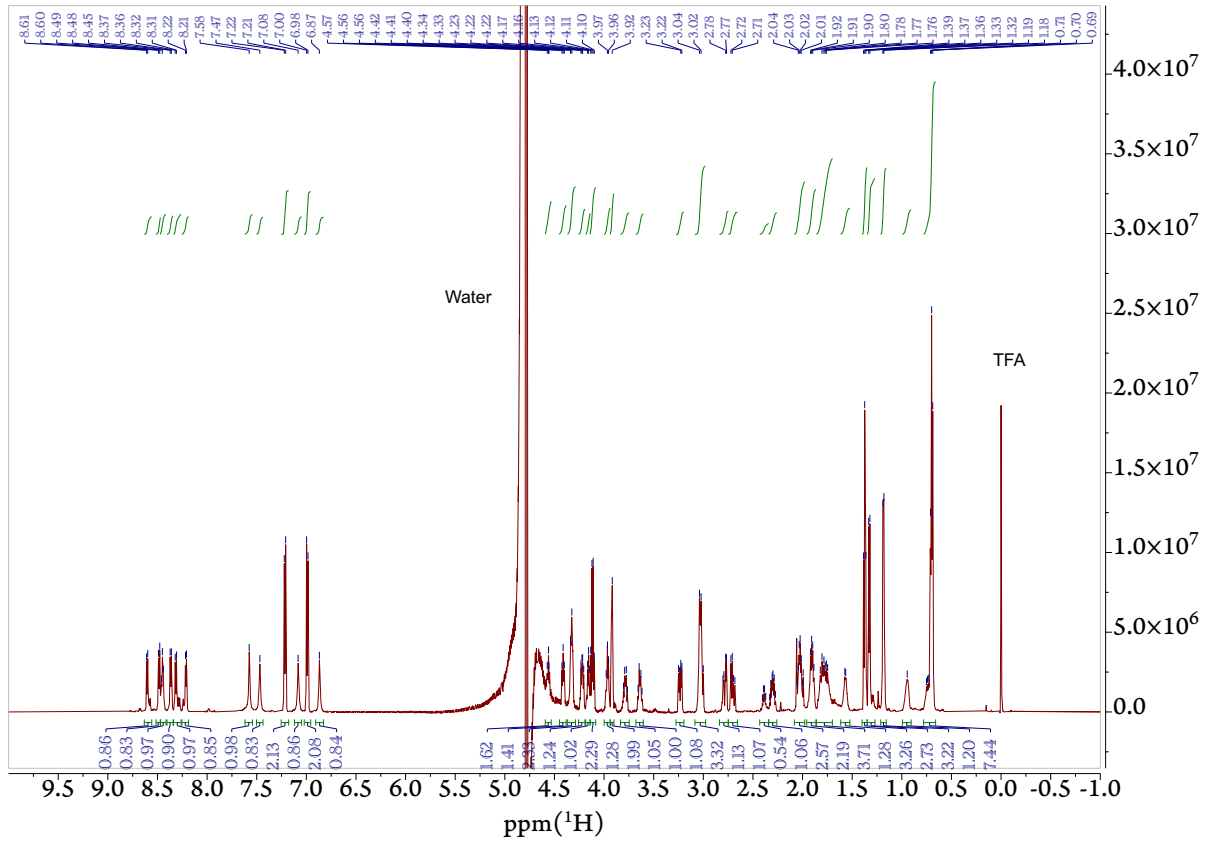

<sup>1</sup>H NMR of above peptide in 50 mM Na<sub>3</sub>PO<sub>4</sub> (pH 4.0), 100 μM TSP, 90% H<sub>2</sub>O/D<sub>2</sub>O, at 298.1 K.

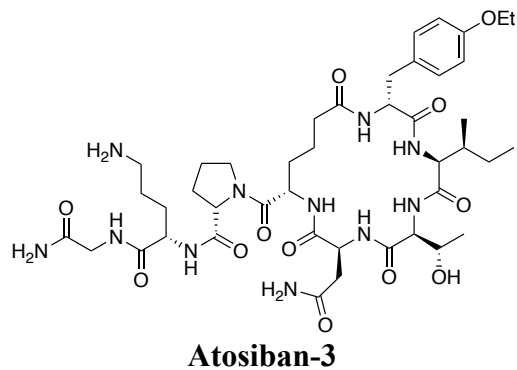

**<sup>1</sup>H NMR (600 MHz)**

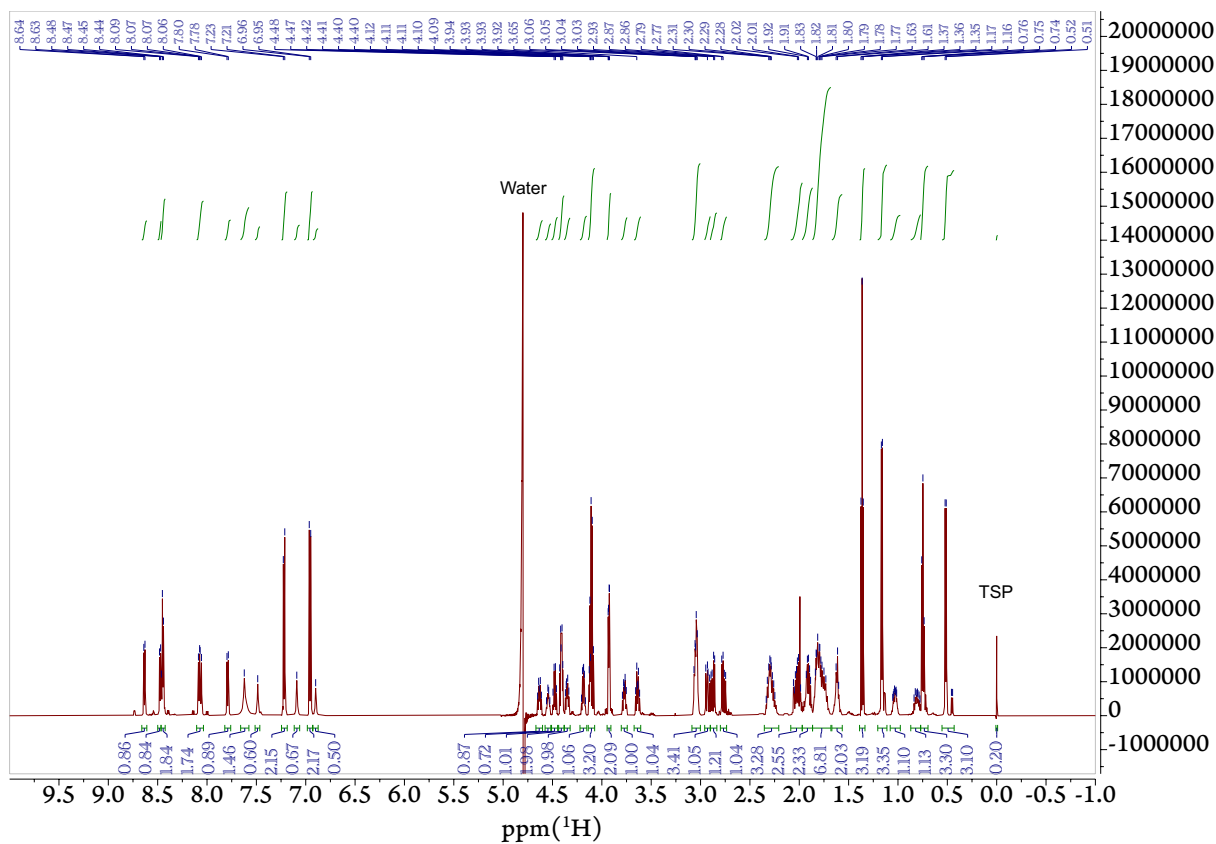

<sup>1</sup>H NMR of above peptide in 50 mM Na<sub>3</sub>PO<sub>4</sub> e (pH 4.0), 100 μM TSP, 90% H<sub>2</sub>O/D<sub>2</sub>O, at 298.1 K.



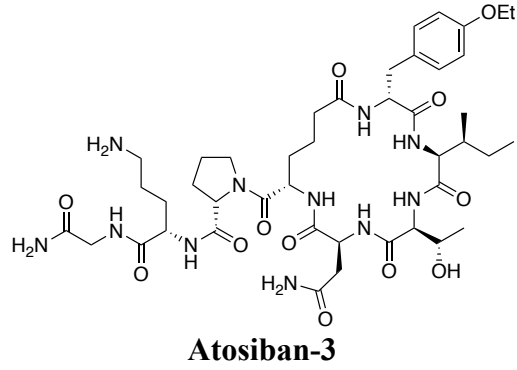

**<sup>1</sup>H NMR (600 MHz)**

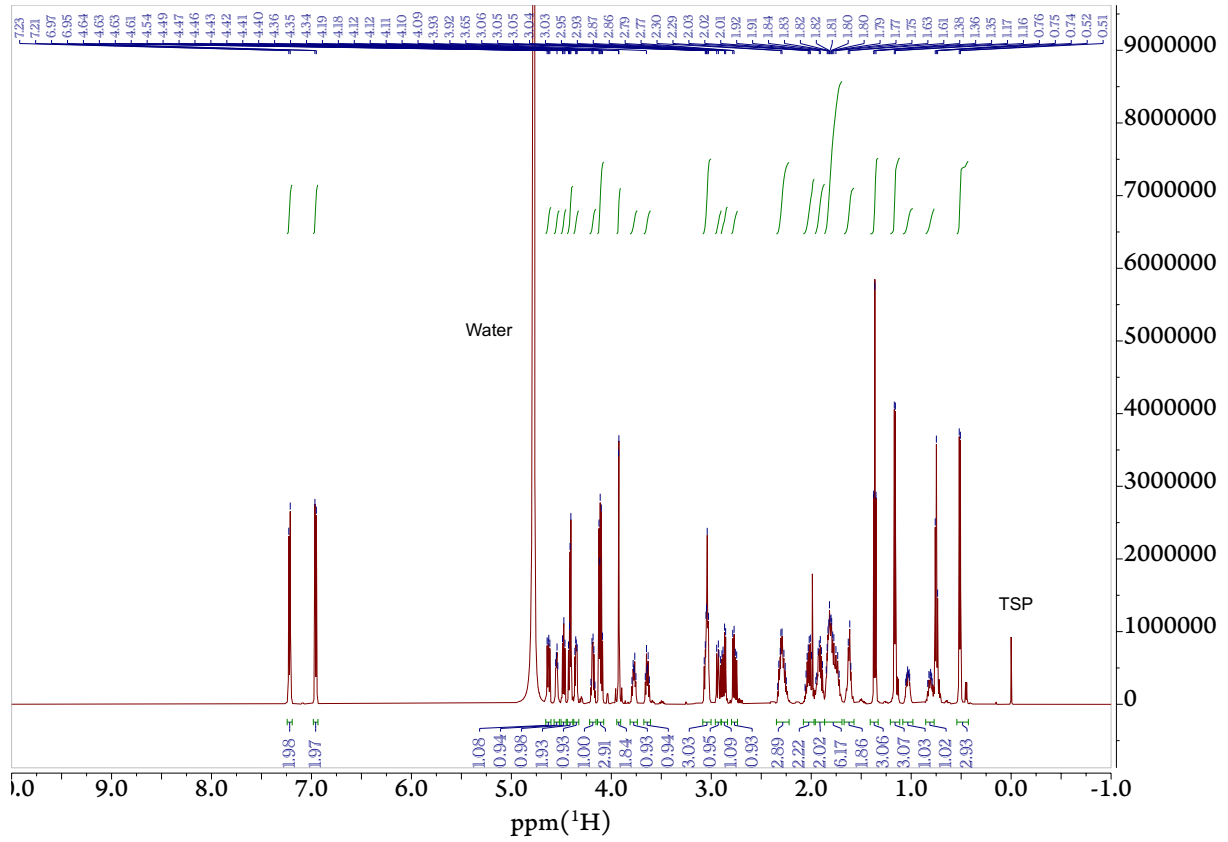

<sup>1</sup>H NMR of above peptide in 50 mM Na<sub>3</sub>PO<sub>4</sub> (pH 4.0), 100 μM TSP, 100% D<sub>2</sub>O, at 298.1 K.

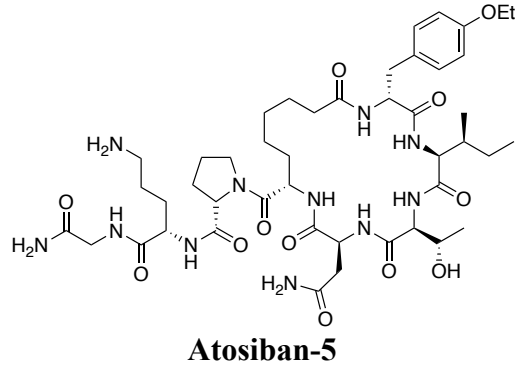

**<sup>1</sup>H NMR (600 MHz)**

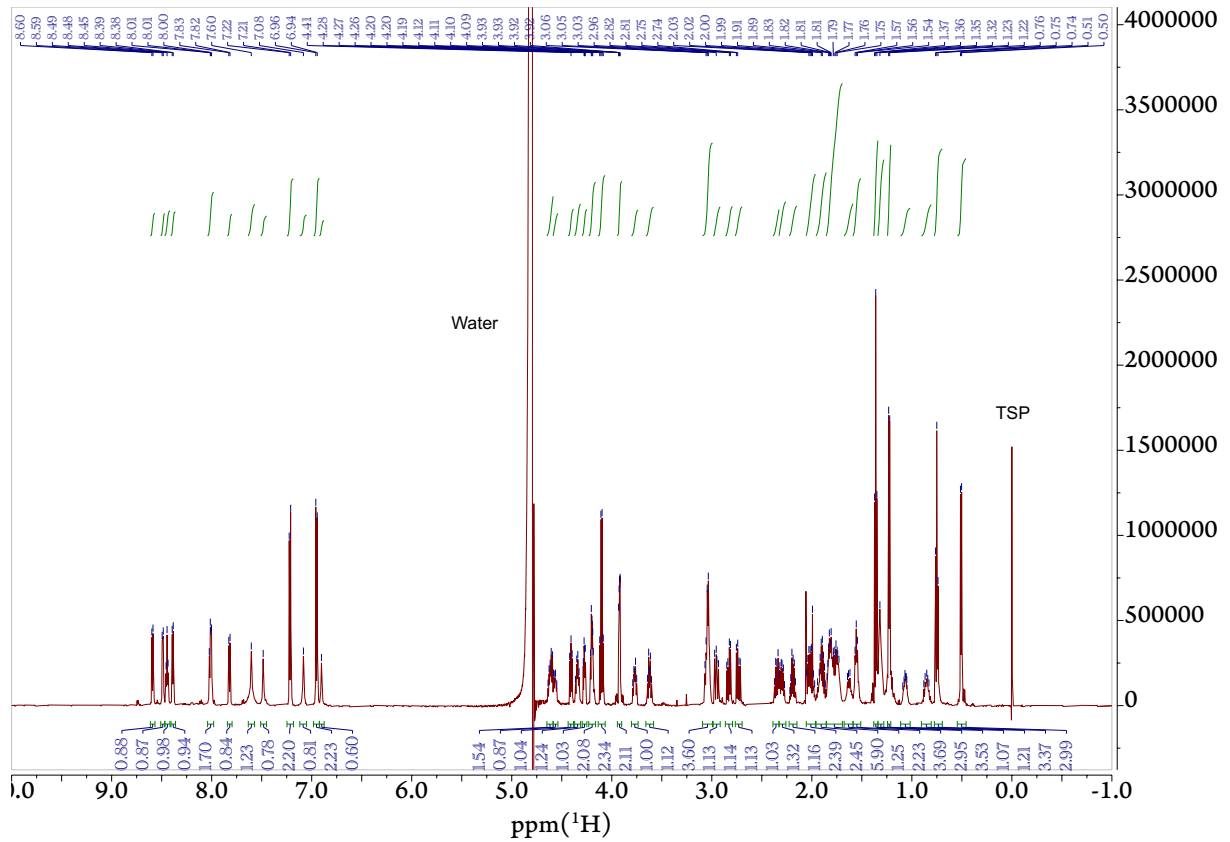

<sup>1</sup>H NMR of above peptide in 50 mM Na<sub>3</sub>PO<sub>4</sub> (pH 4.0), 100 μM TSP, 90% H<sub>2</sub>O/D<sub>2</sub>O, at 298.1 K.



**<sup>1</sup>H NMR (600 MHz)**

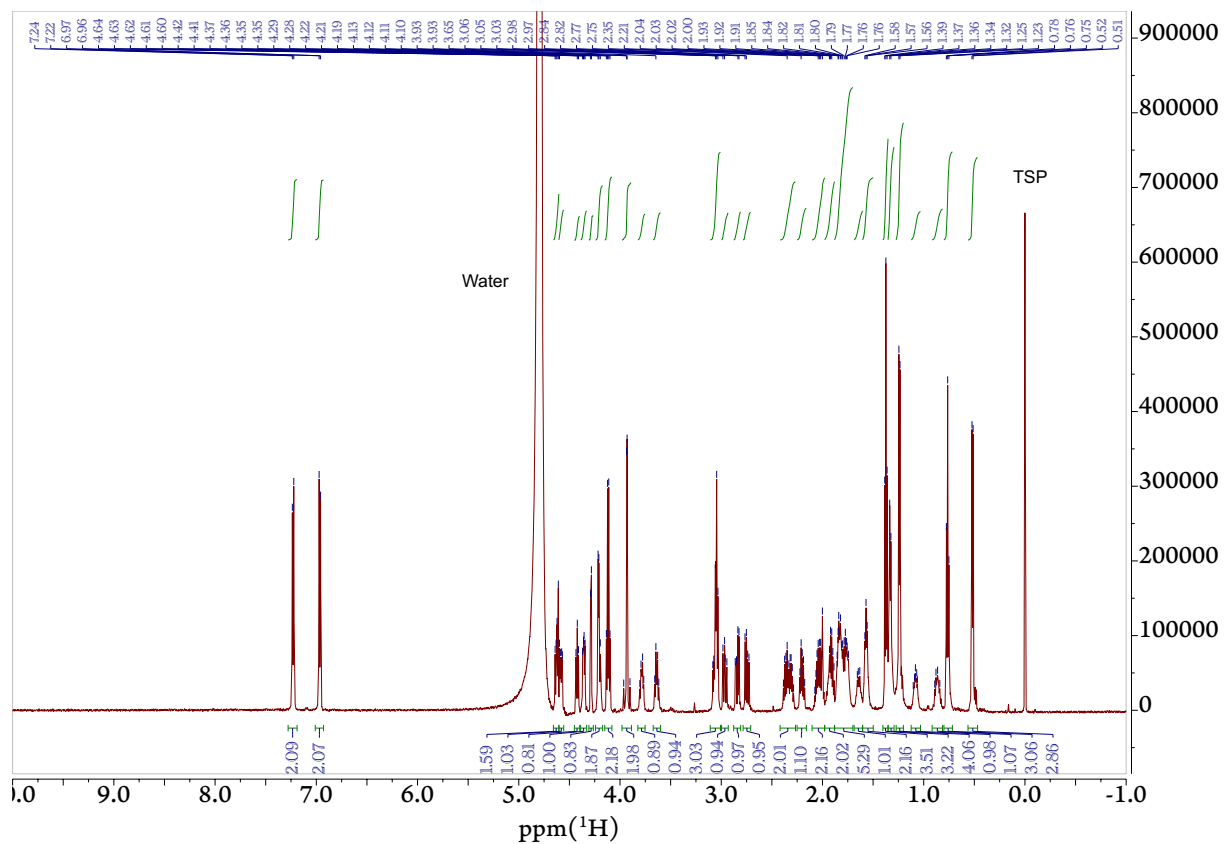

<sup>1</sup>H NMR of above peptide in 50 mM Na<sub>3</sub>PO<sub>4</sub> (pH 4.0), 100 μM TSP, 100% D<sub>2</sub>O, at 298.1 K.



**<sup>1</sup>H NMR (600 MHz)**

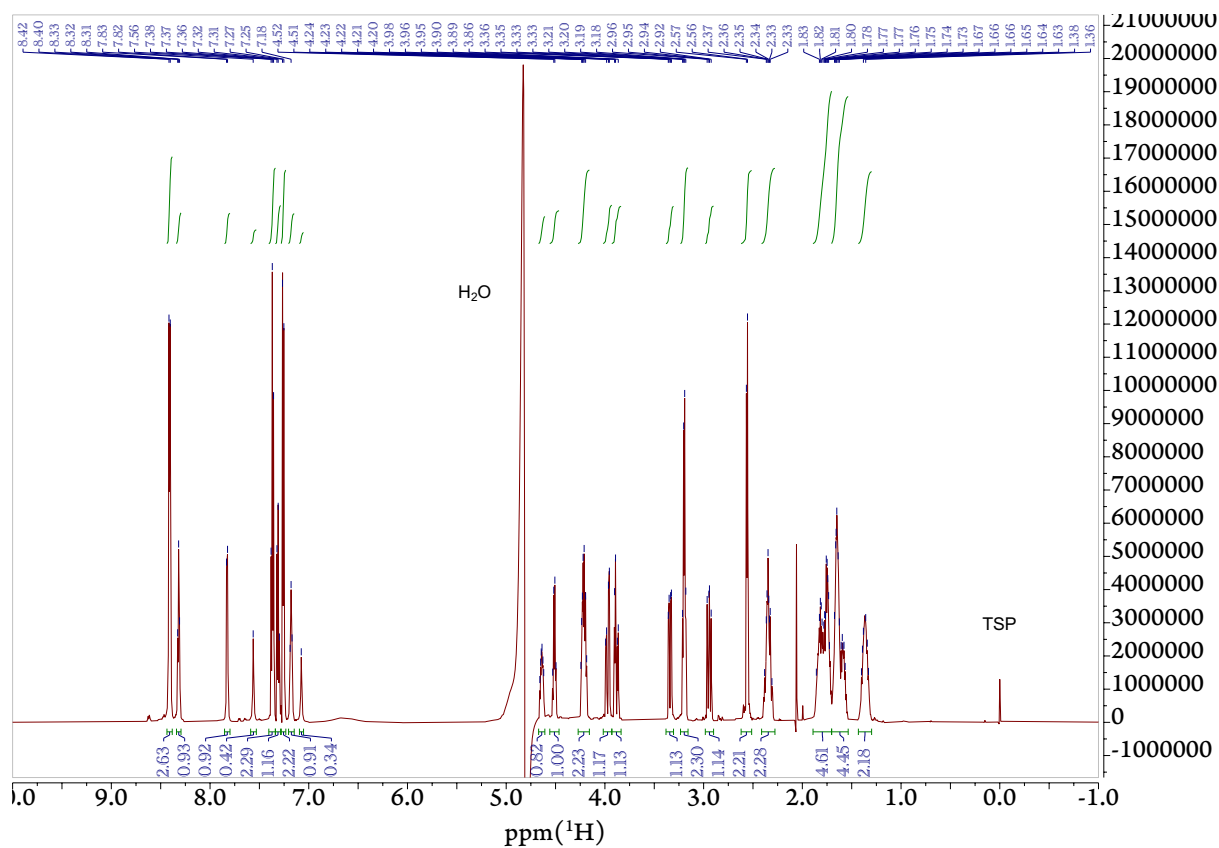

<sup>1</sup>H NMR of above peptide in 50 mM Na<sub>3</sub>PO<sub>4</sub> (pH 4.0), 100 μM TSP, 90% H<sub>2</sub>O/D<sub>2</sub>O, at 298.1 K.



**<sup>1</sup>H NMR (600 MHz)**

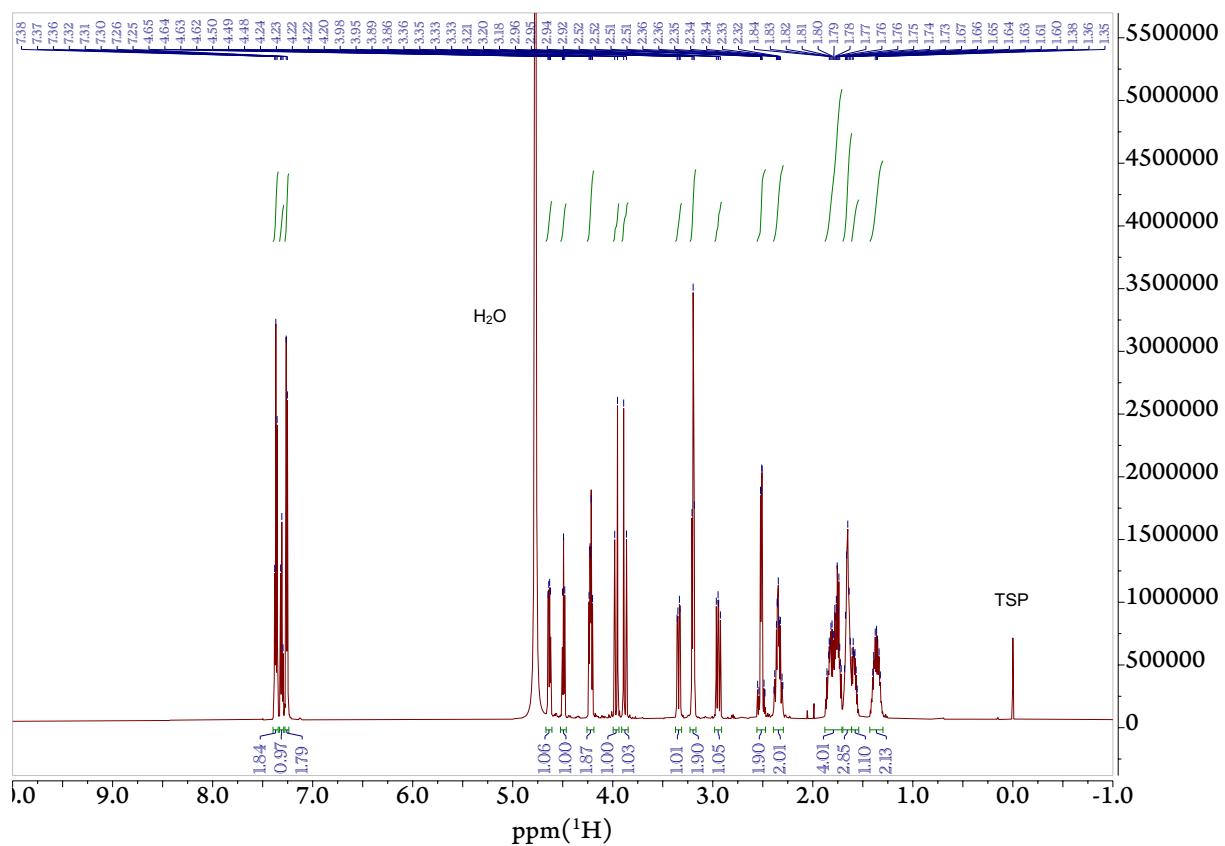

<sup>1</sup>H NMR of above peptide in 50 mM Na<sub>3</sub>PO<sub>4</sub> (pH 4.0), 100 μM TSP, D<sub>2</sub>O, at 298.1 K.



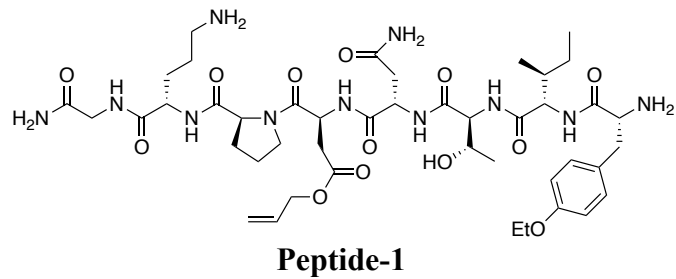

<sup>1</sup>H NMR (600 MHz)

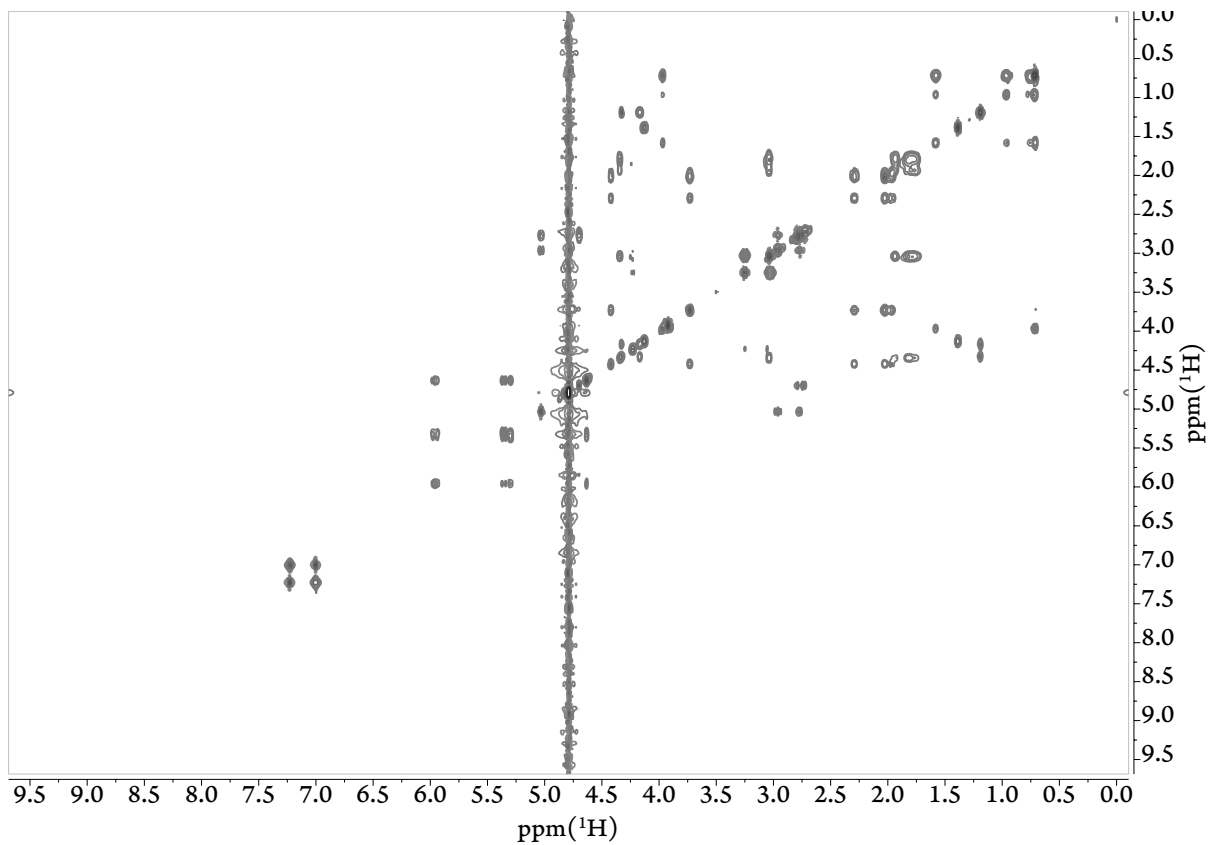

<sup>1</sup>H TOCSY NMR of above peptide in 50 mM Na<sub>3</sub>PO<sub>4</sub> (pH 4.0), 100 μM TSP, 100% D<sub>2</sub>O, at 298.1 K.

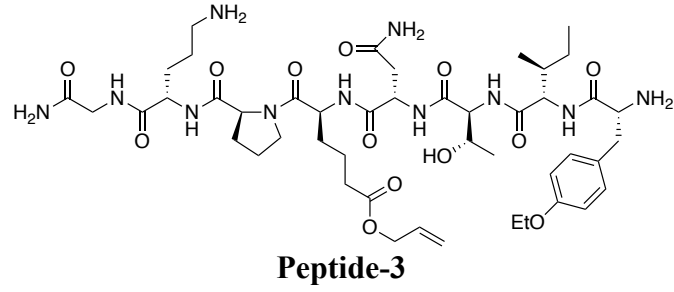

<sup>1</sup>H NMR (600 MHz)

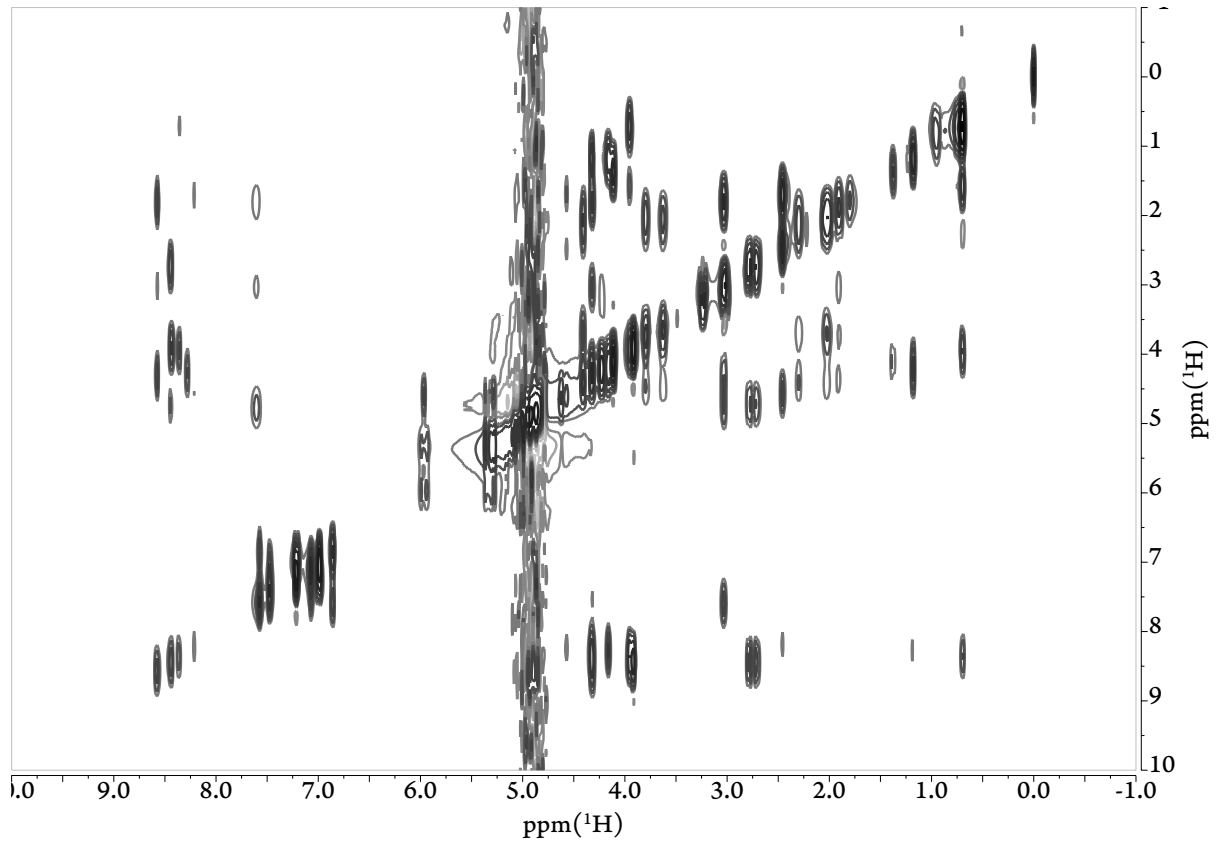

<sup>1</sup>H TOCSY NMR of above peptide in 50 mM Na<sub>3</sub>PO<sub>4</sub> (pH 4.0), 100 μM TSP, 90% H<sub>2</sub>O/D<sub>2</sub>O, at 298.1 K.





<sup>1</sup>H NMR (600 MHz)

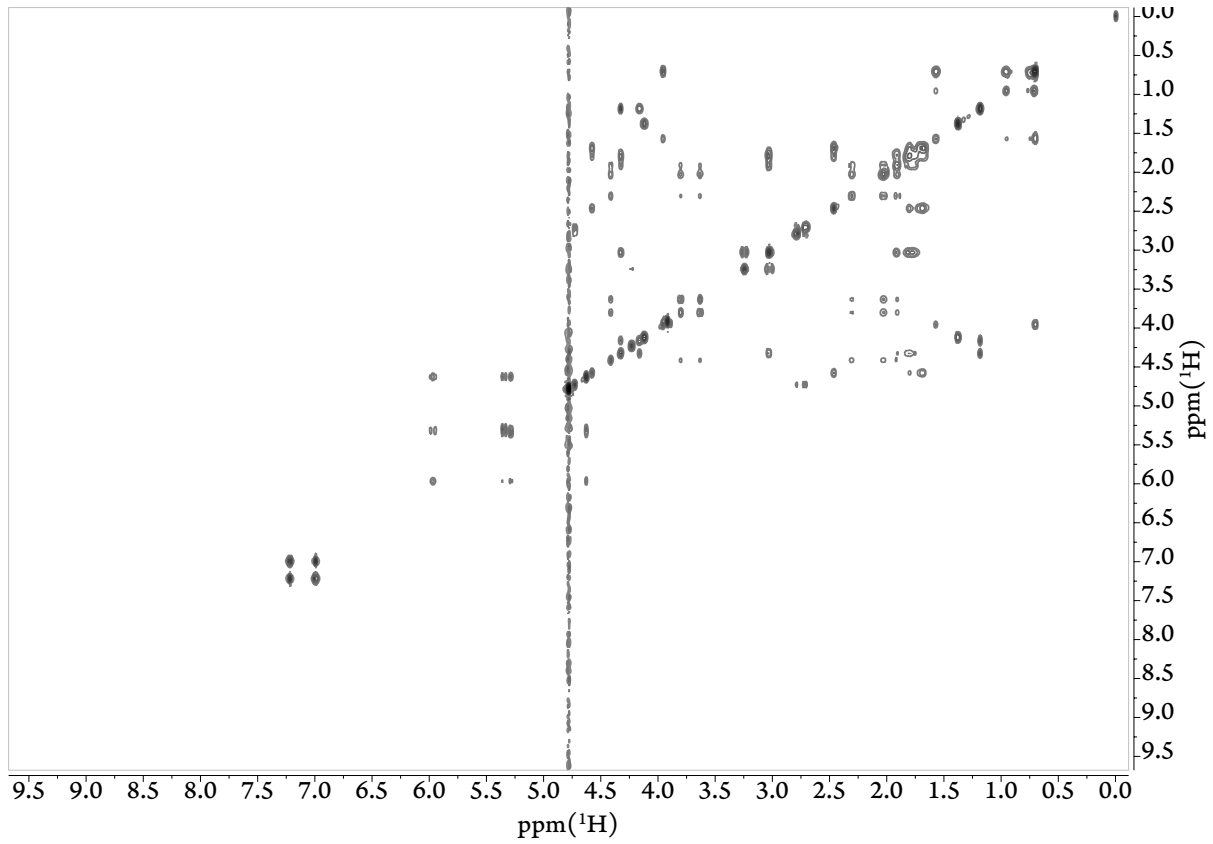

<sup>1</sup>H TOCSY NMR of above peptide in 50 mM Na<sub>3</sub>PO<sub>4</sub> (pH 4.0), 100 μM TSP, 100% D<sub>2</sub>O, at 298.1 K.

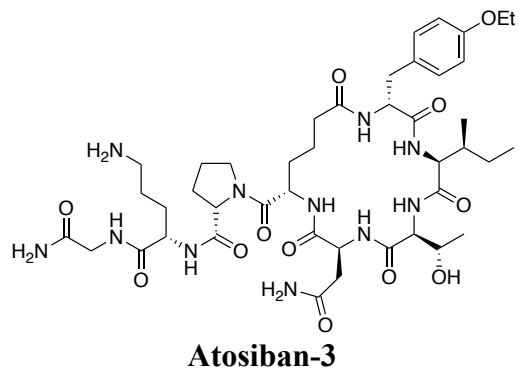

<sup>1</sup>H NMR (600 MHz)

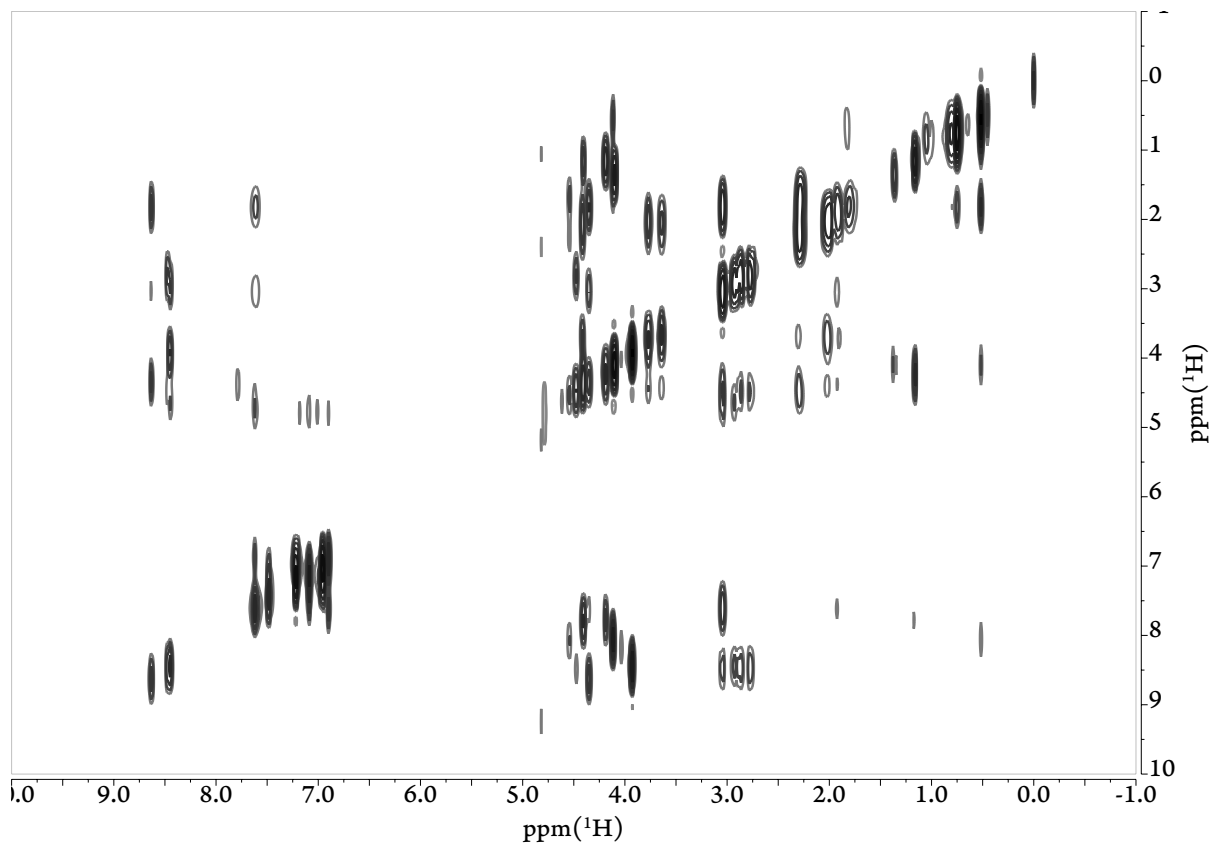

<sup>1</sup>H TOCSY NMR of above peptide in 50 mM Na<sub>3</sub>PO<sub>4</sub> (pH 4.0), 100 μM TSP, 90% H<sub>2</sub>O/D<sub>2</sub>O, at 298.1 K.



<sup>1</sup>H NMR (600 MHz)

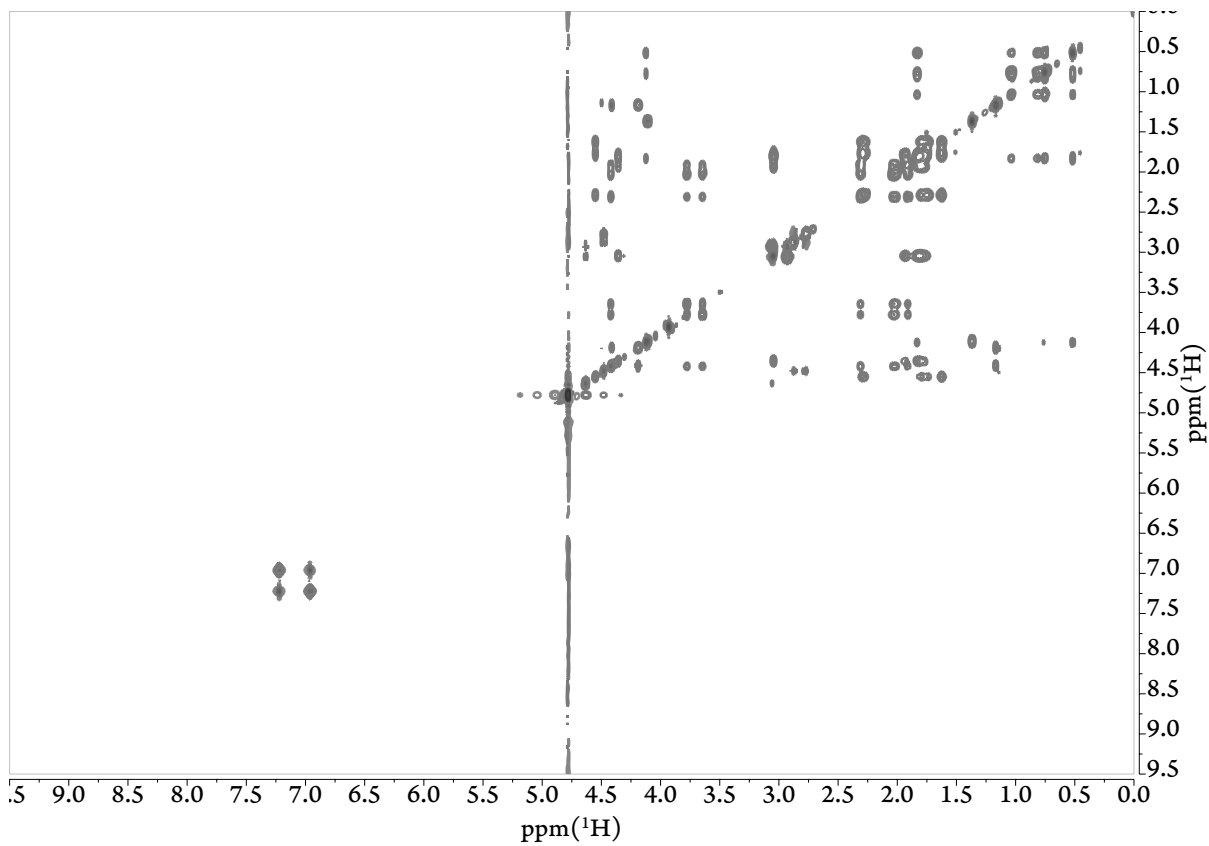

<sup>1</sup>H TOCSY NMR of above peptide in 50 mM Na<sub>3</sub>PO<sub>4</sub> (pH 4.0), 100 μM TSP, 100% D<sub>2</sub>O, at 298.1 K.

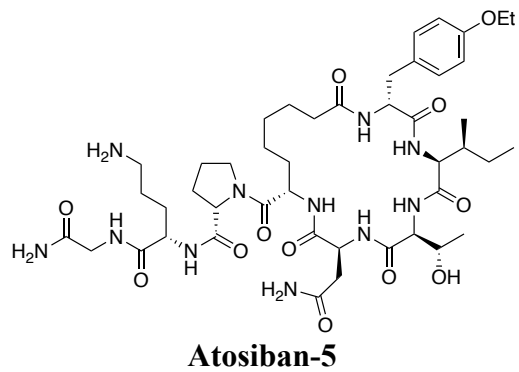

**<sup>1</sup>H NMR (600 MHz)**

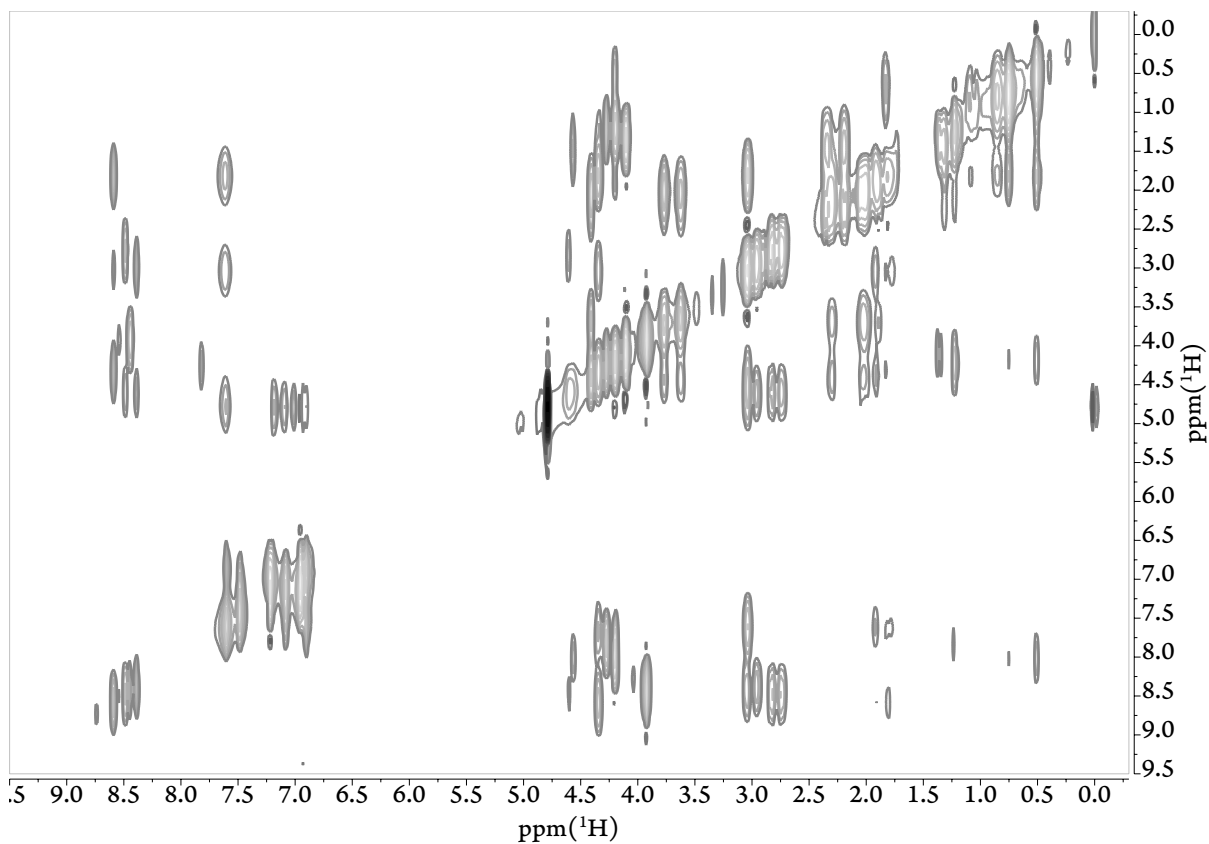

<sup>1</sup>H TOCSY NMR of above peptide in 50 mM Na<sub>3</sub>PO<sub>4</sub> (pH 4.0), 100 μM TSP, 90% H<sub>2</sub>O/D<sub>2</sub>O, at 298.1 K.

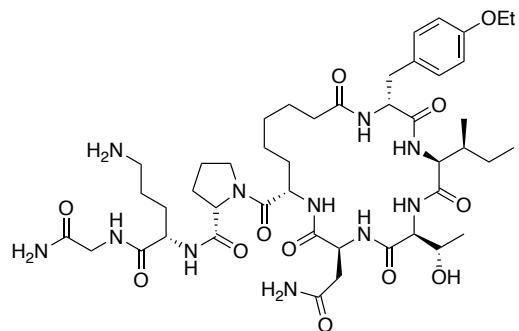

**Atosiban-5**

**<sup>1</sup>H NMR (600 MHz)**

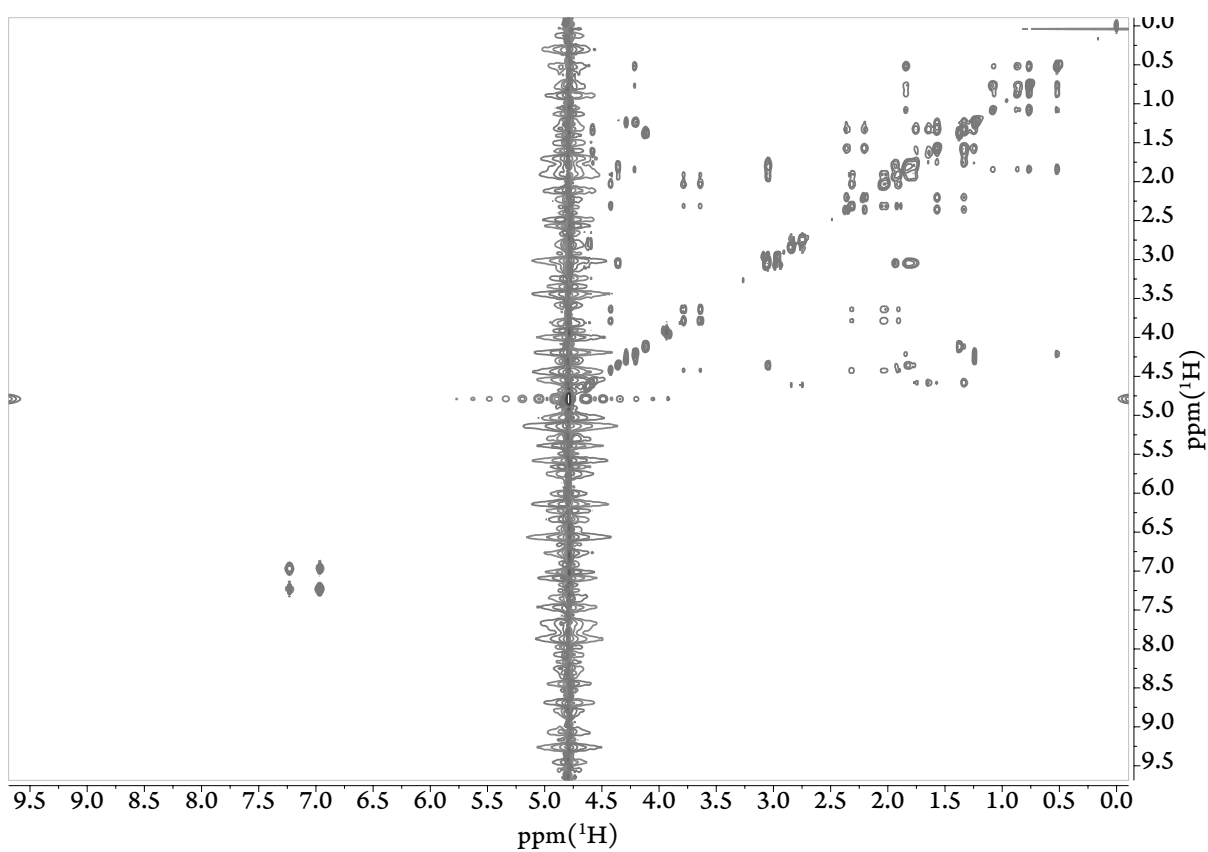

<sup>1</sup>H TOCSY NMR of above peptide in 50 mM Na<sub>3</sub>PO<sub>4</sub> (pH 4.0), 100 μM TSP, 100% D<sub>2</sub>O, at 298.1 K.

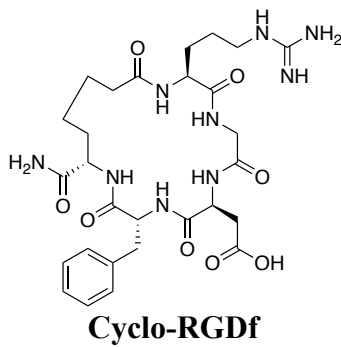

<sup>1</sup>H NMR (600 MHz)

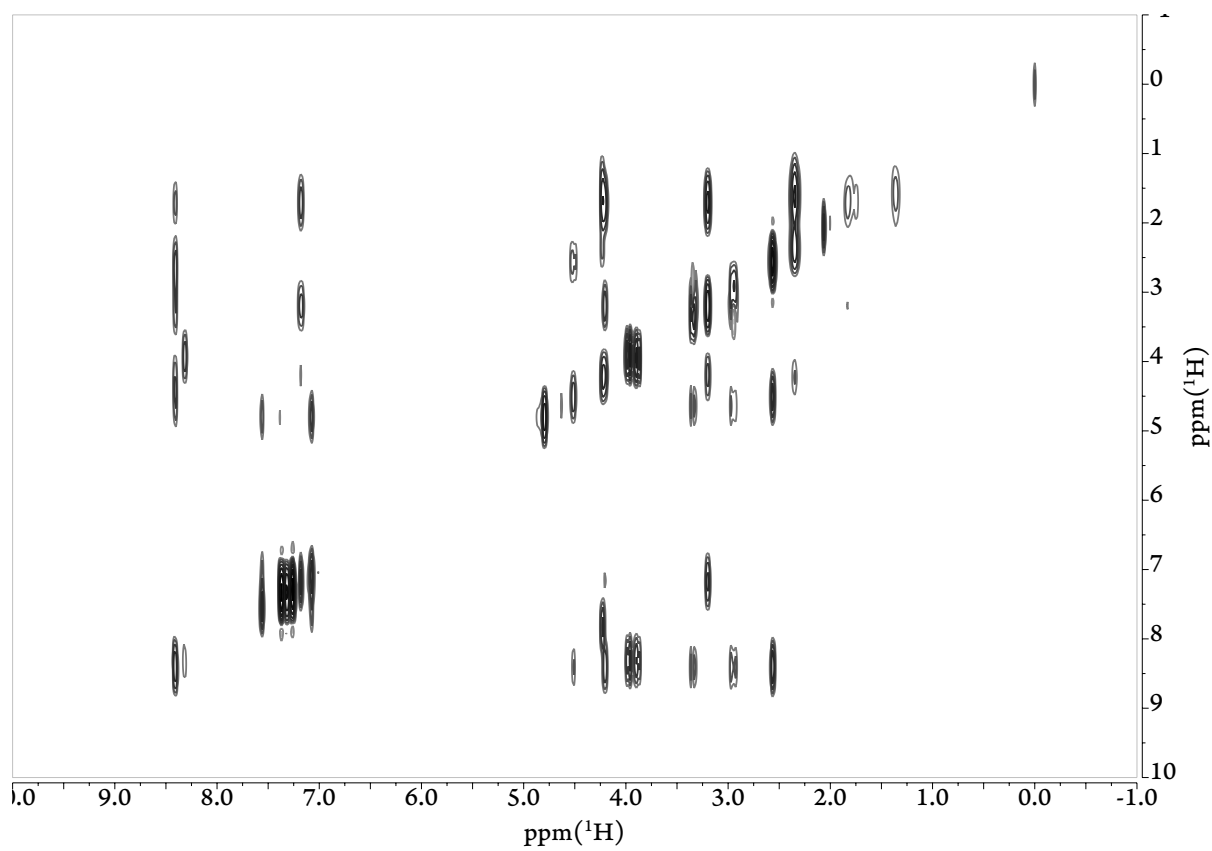

<sup>1</sup>H TOCSY NMR of above peptide in 50 mM Na<sub>3</sub>PO<sub>4</sub> (pH 4.0), 100 μM TSP, 90% H<sub>2</sub>O/D<sub>2</sub>O, at 298.1 K.



<sup>1</sup>H NMR (600 MHz)

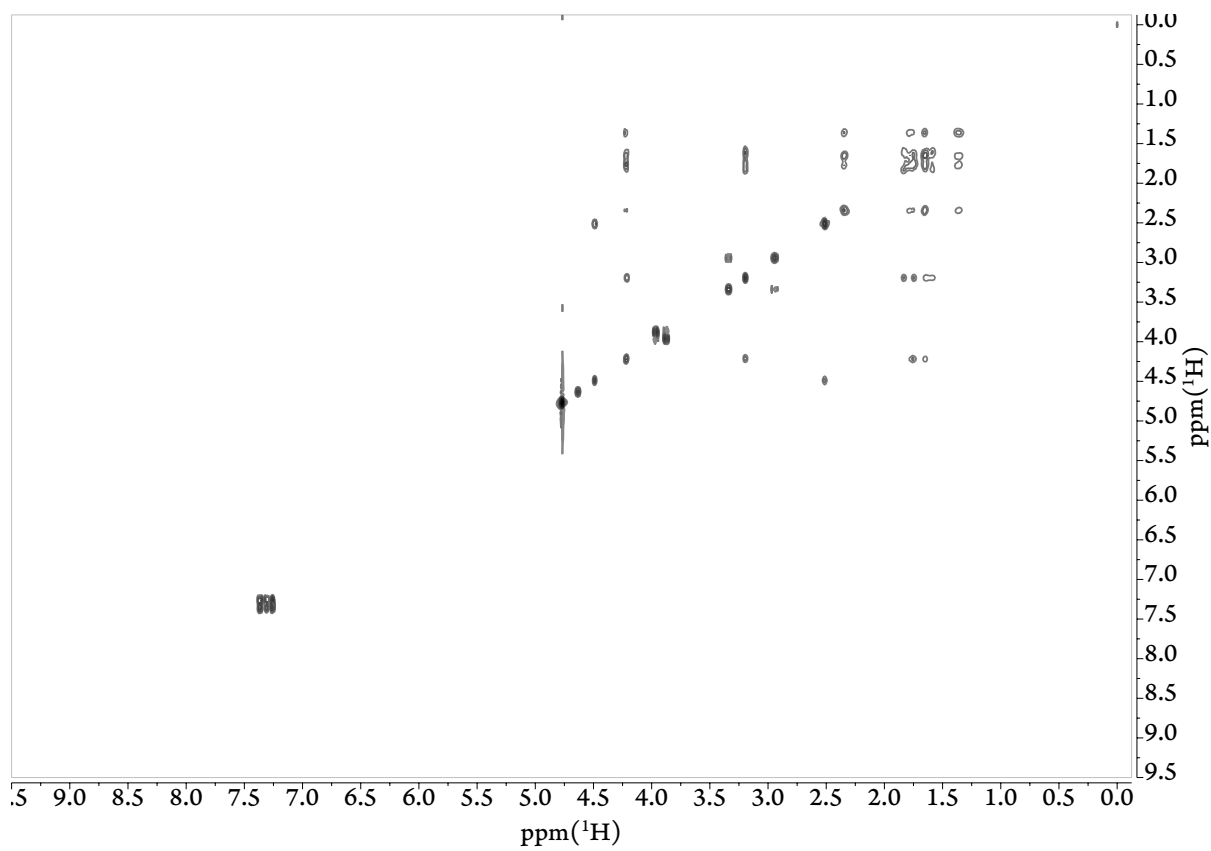

<sup>1</sup>H TOCSY NMR of above peptide in 50 mM Na<sub>3</sub>PO<sub>4</sub> (pH 4.0), 100 μM TSP, D<sub>2</sub>O, at 298.1 K.

## <sup>13</sup>C NMR Spectra of Peptides

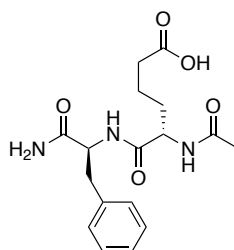

### <sup>13</sup>C NMR (151 MHz)

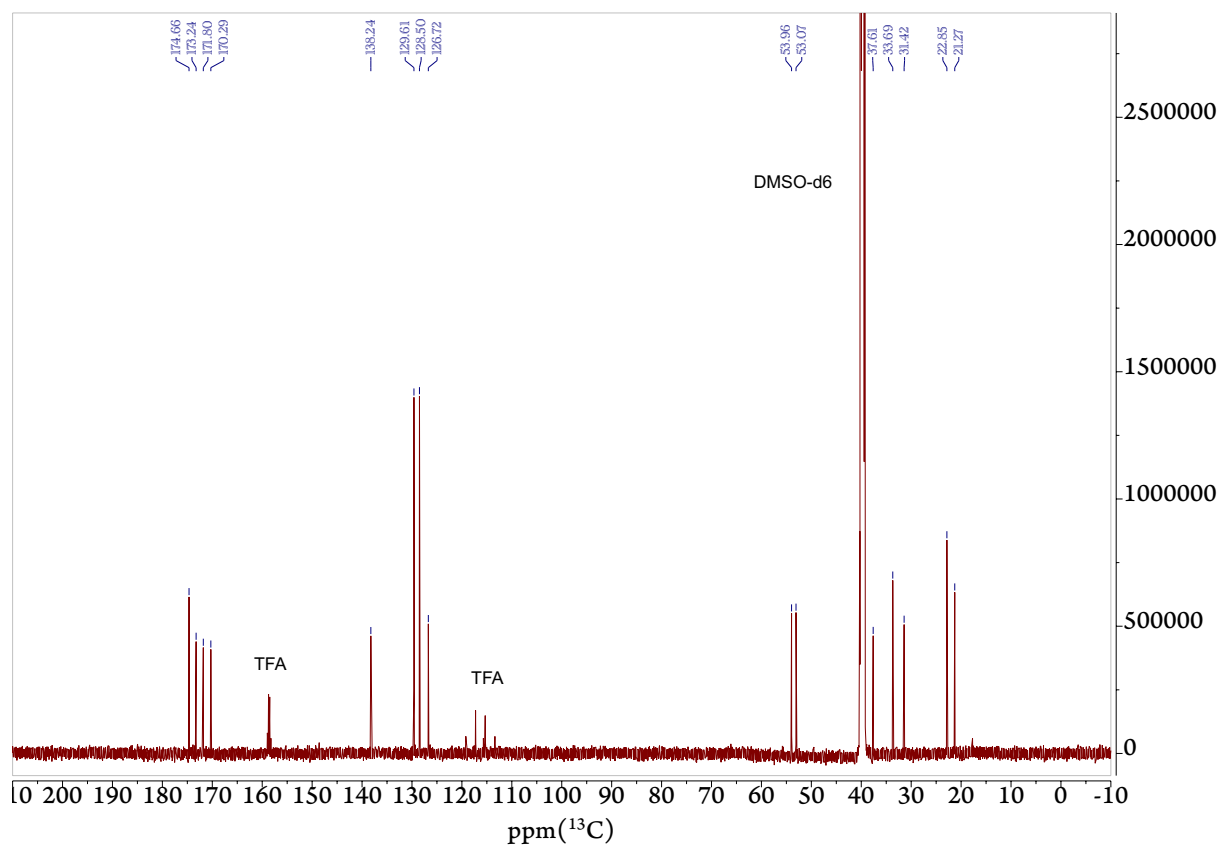

<sup>13</sup>C NMR of above peptide in 5% D<sub>2</sub>O/DMSO-*d*<sub>6</sub> at 298.1 K.





**$^{13}\text{C}$  NMR (151 MHz)**

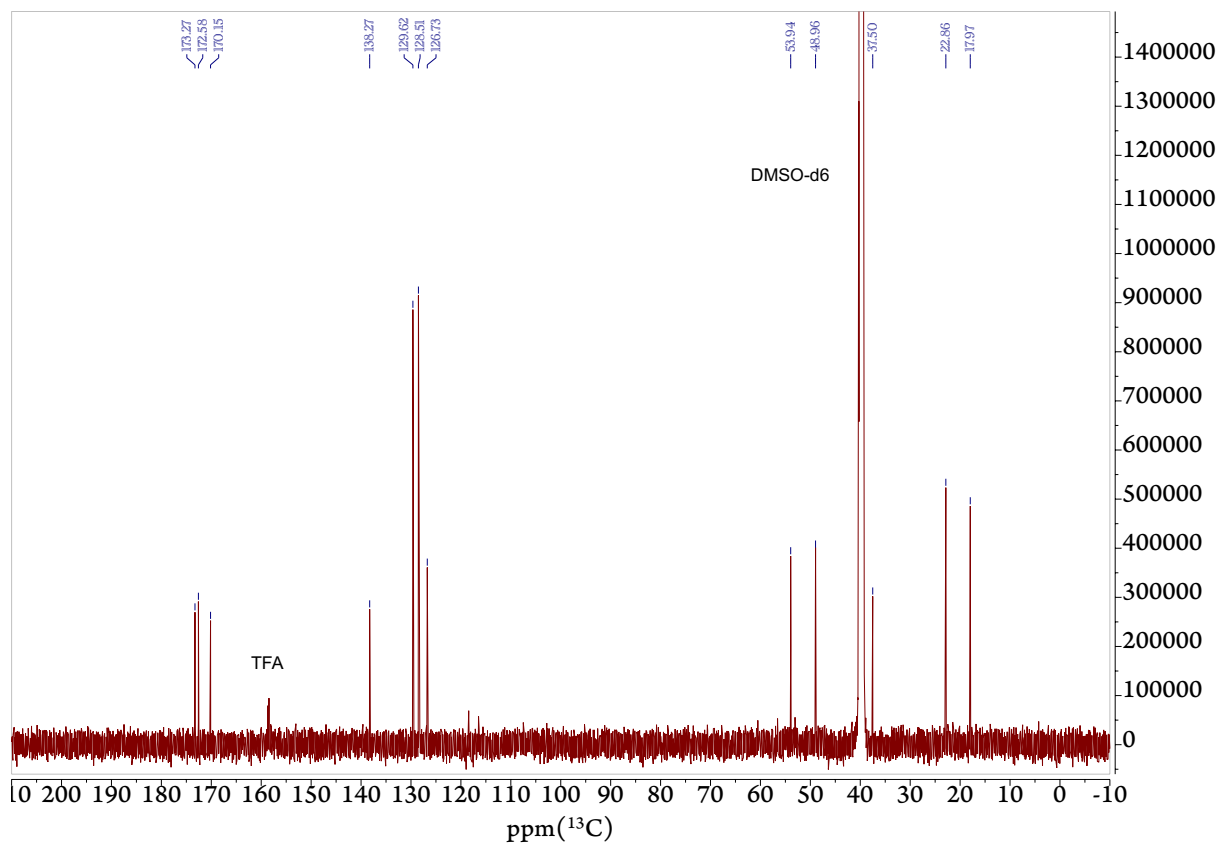

$^{13}\text{C}$  NMR of above peptide in 5%  $\text{D}_2\text{O}/\text{DMSO-}d_6$  at 298.1 K.

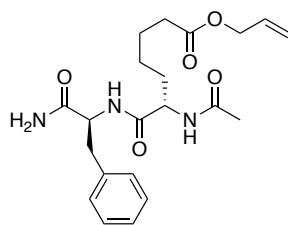

**$^{13}\text{C}$  NMR (151 MHz)**

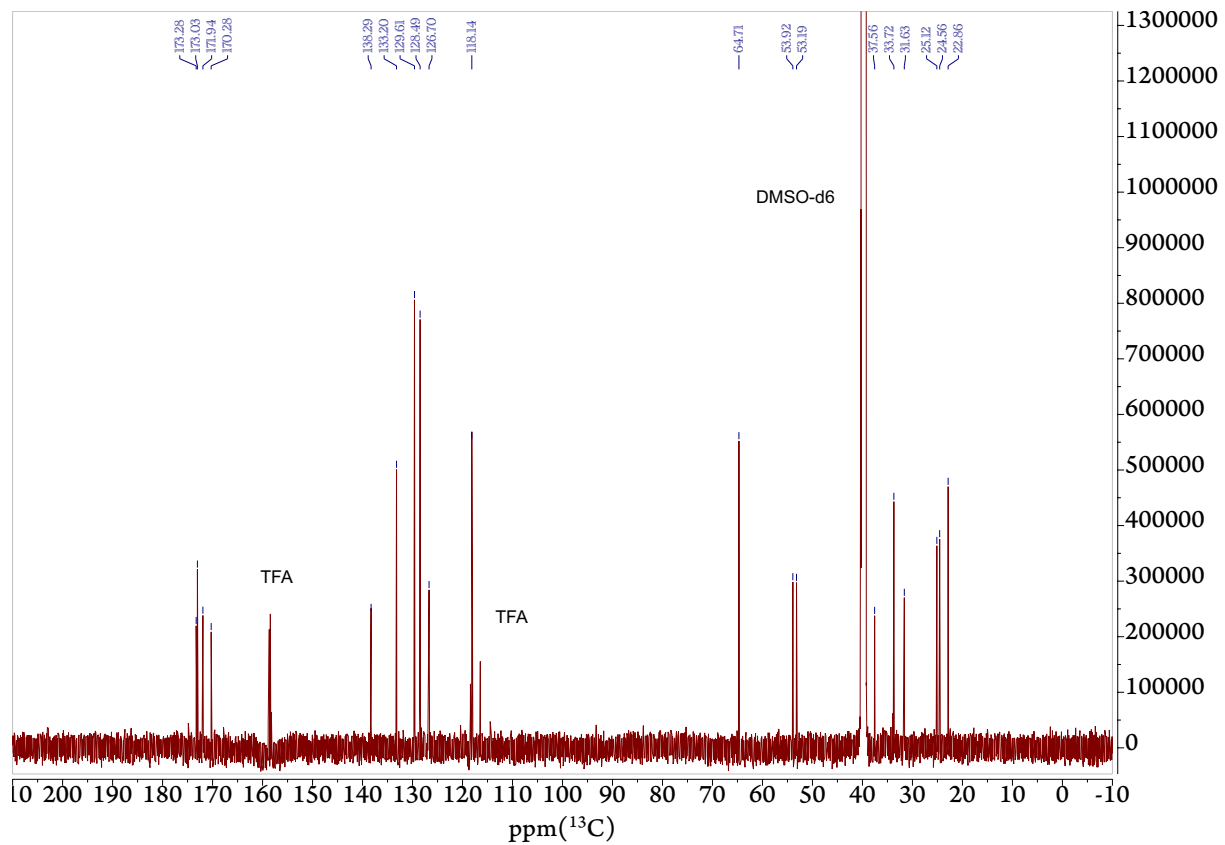

$^{13}\text{C}$  NMR of above peptide in 5%  $\text{D}_2\text{O}/\text{DMSO-}d_6$  at 298.1 K.



**$^{13}\text{C}$  NMR (151 MHz)**

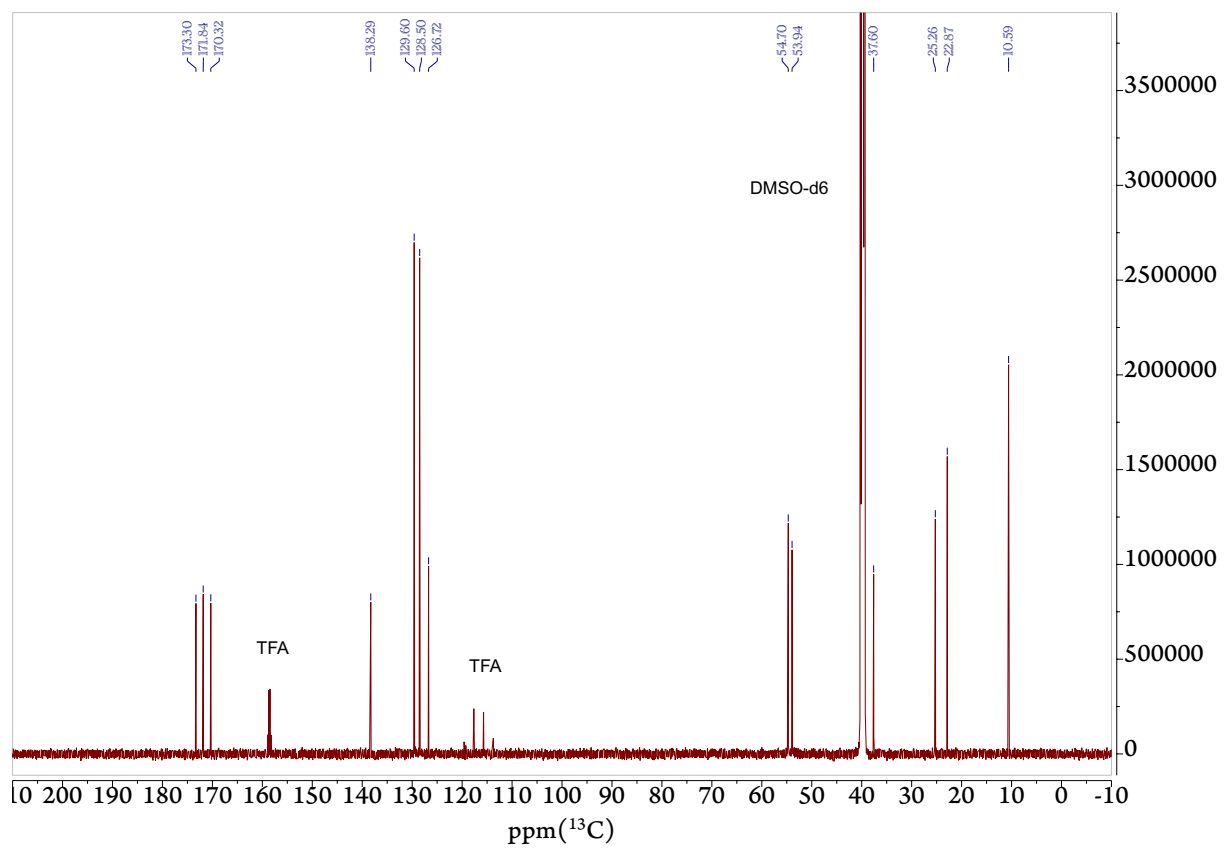

$^{13}\text{C}$  NMR of above peptide in 5%  $\text{D}_2\text{O}/\text{DMSO}-d_6$  at 298.1 K.

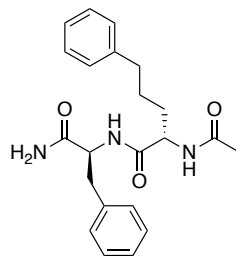

**$^{13}\text{C}$  NMR (151 MHz)**

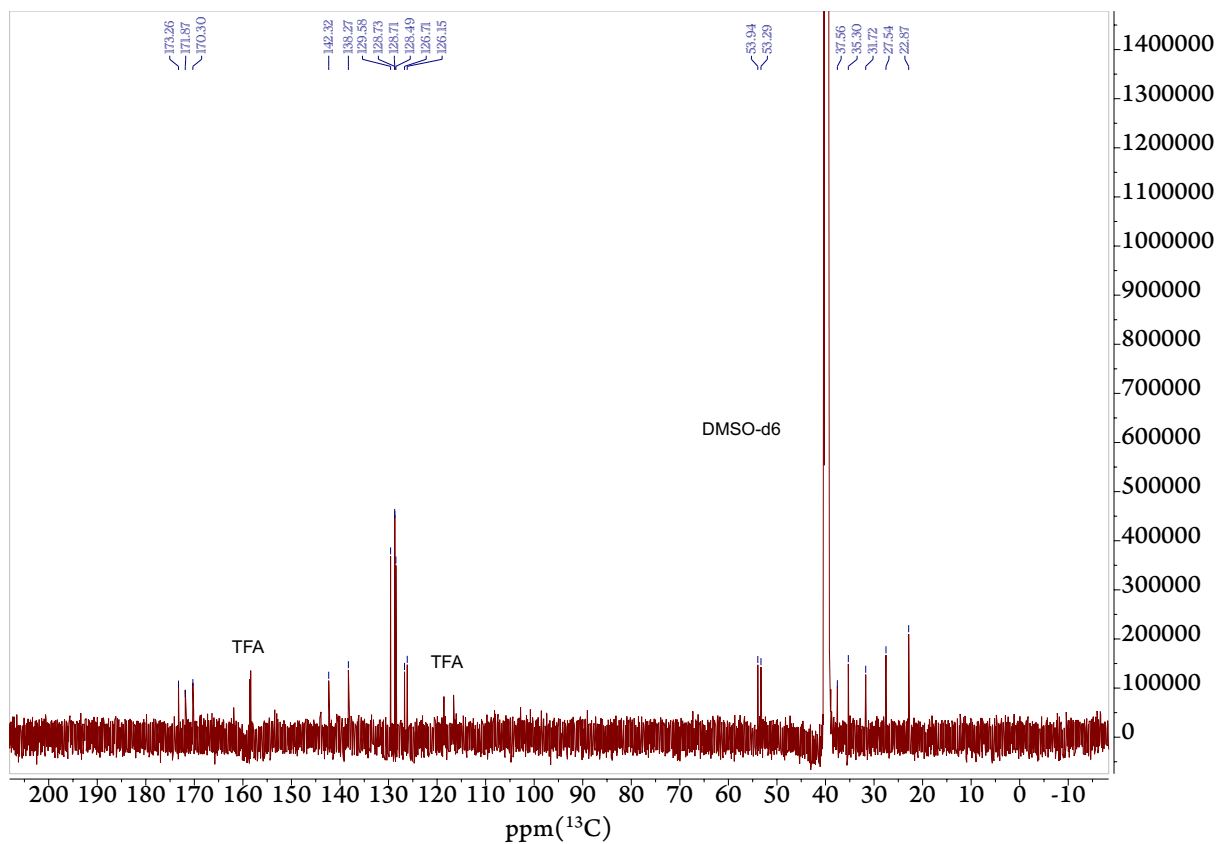

$^{13}\text{C}$  NMR of above peptide in 5%  $\text{D}_2\text{O}/\text{DMSO-}d_6$  at 298.1 K.



**$^{13}\text{C}$  NMR (151 MHz)**

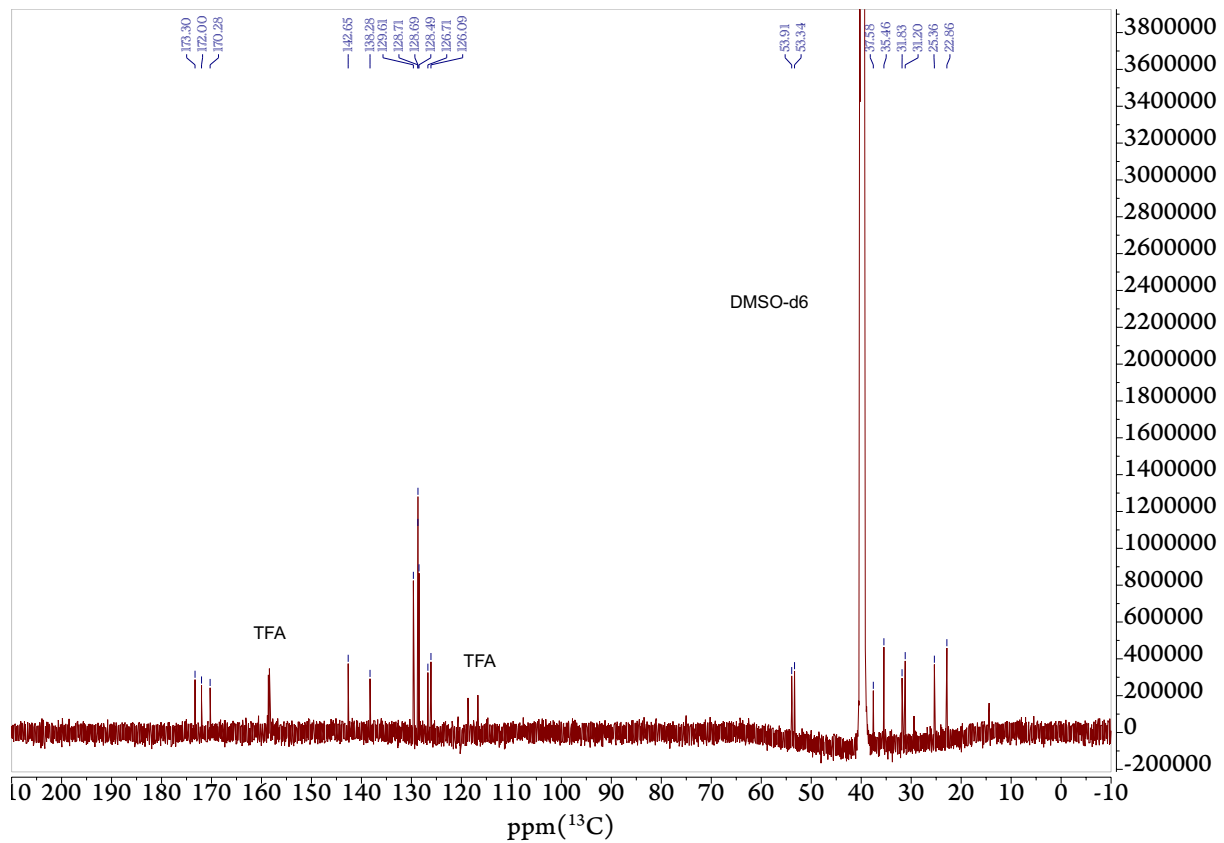

$^{13}\text{C}$  NMR of above peptide in 5%  $\text{D}_2\text{O}/\text{DMSO-}d_6$  at 298.1 K.

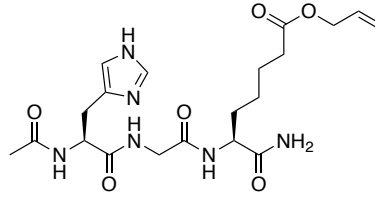

**$^{13}\text{C}$  NMR (151 MHz)**

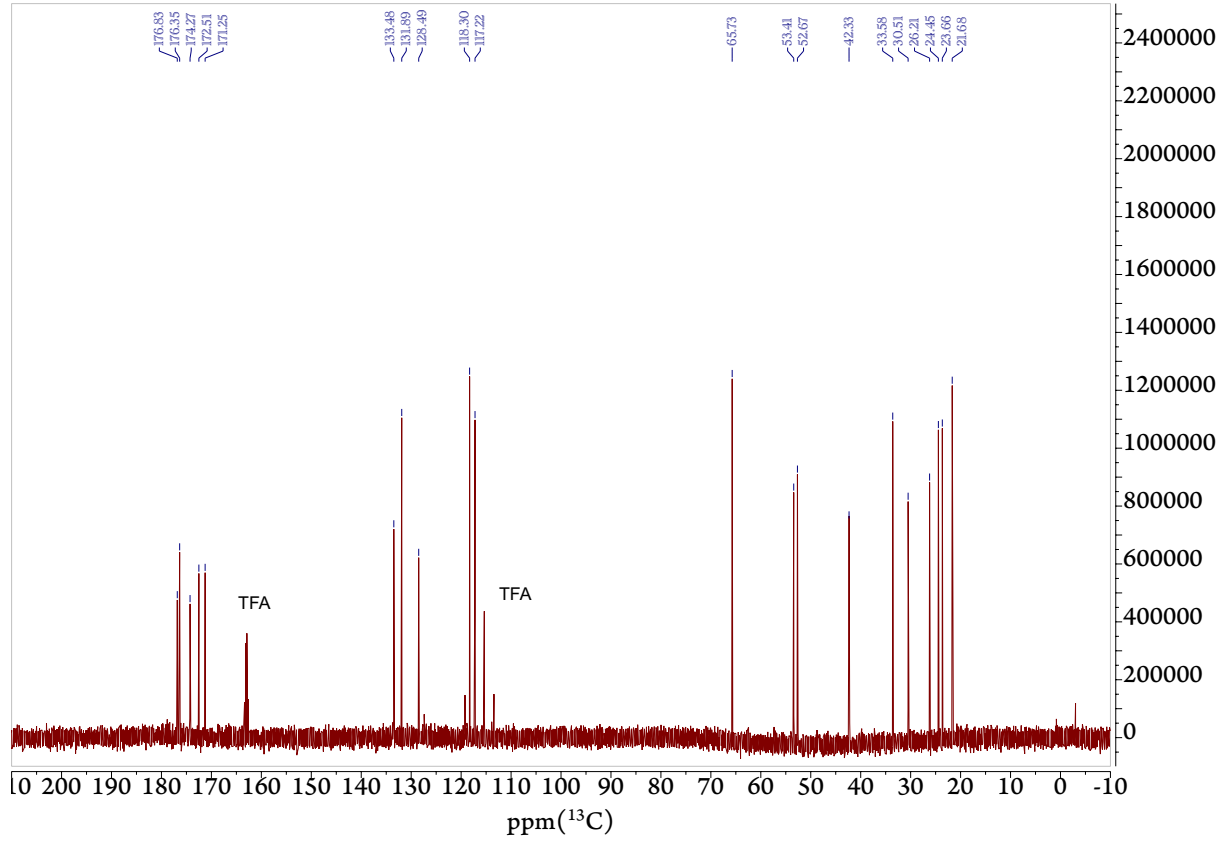

$^{13}\text{C}$  NMR of above peptide in  $\text{D}_2\text{O}$  at 298.1 K.

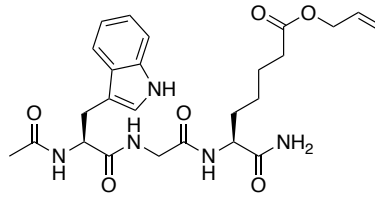

**$^{13}\text{C}$  NMR (151 MHz)**

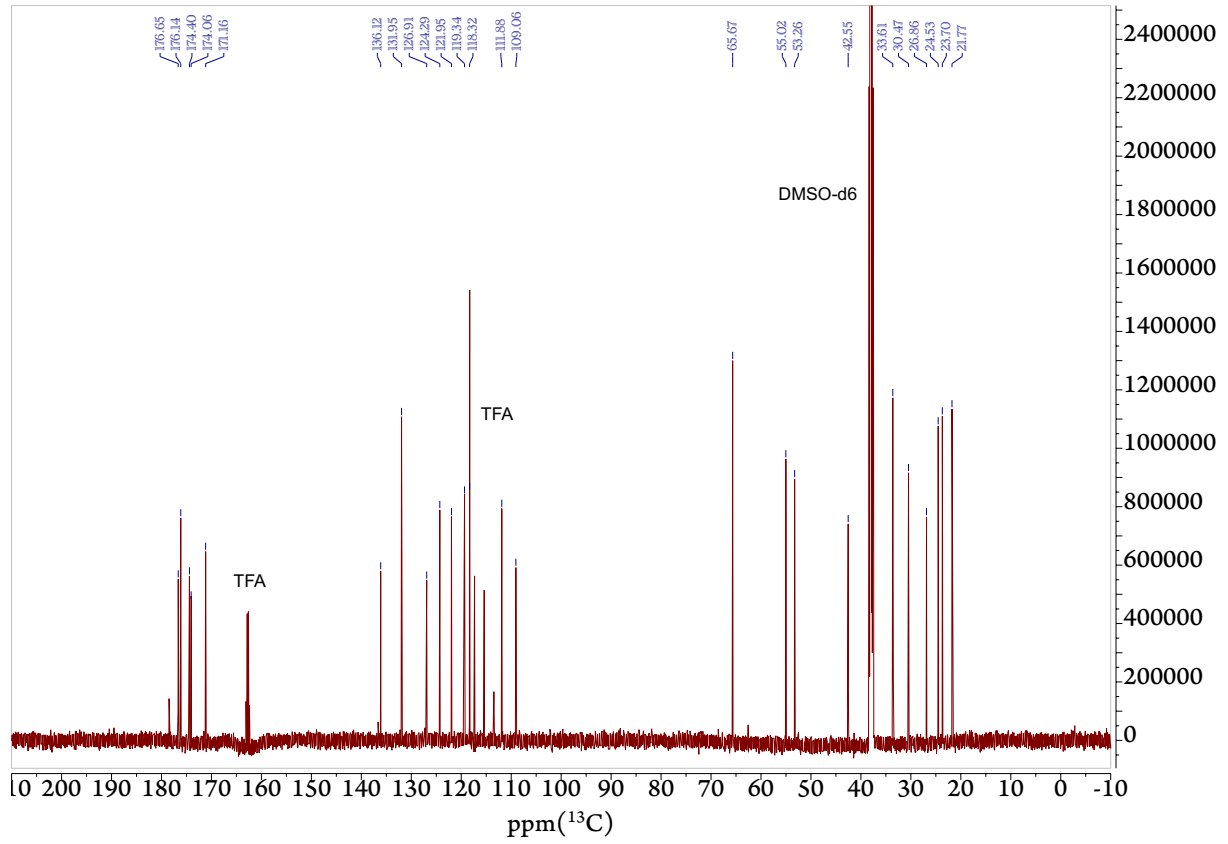

$^{13}\text{C}$  NMR of above peptide in 10 % DMSO-*d*6/D<sub>2</sub>O at 298.1 K.

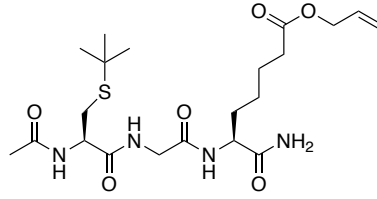

**$^{13}\text{C}$  NMR (151 MHz)**

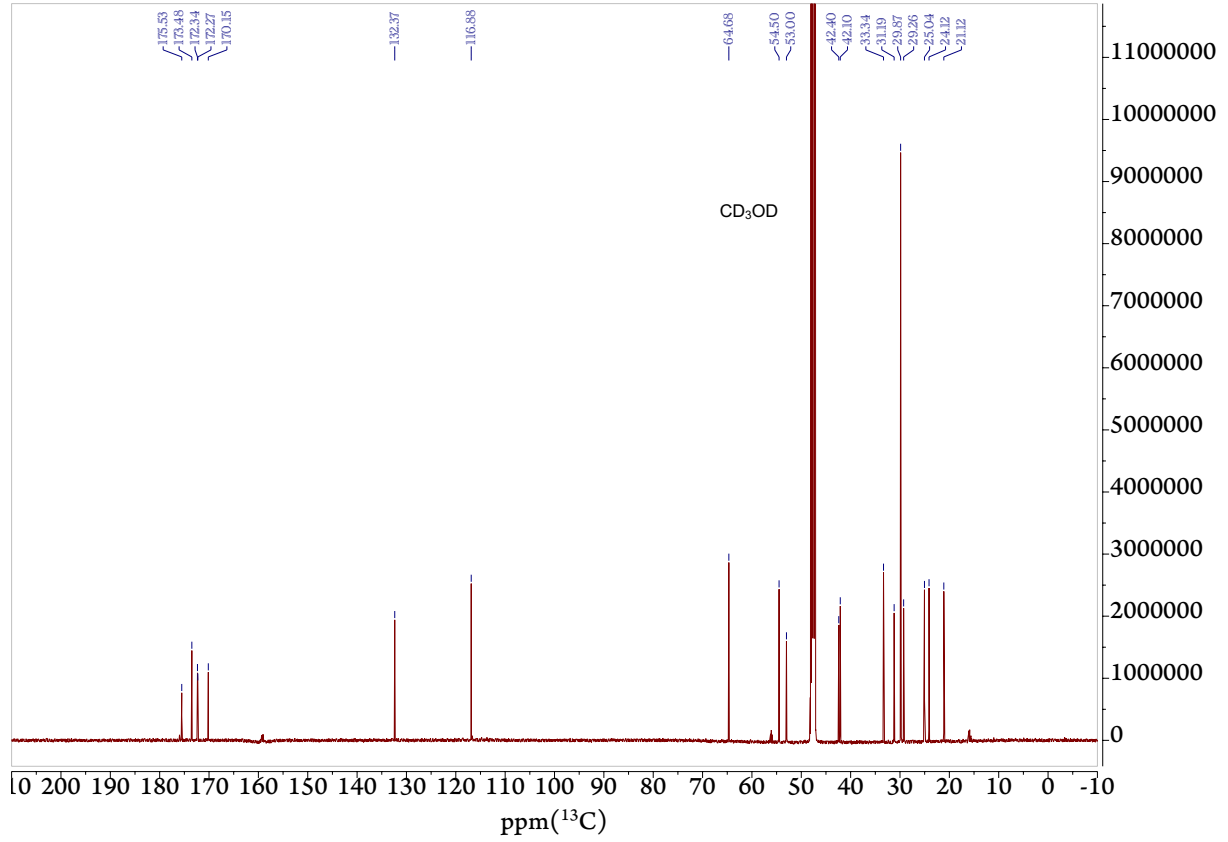

$^{13}\text{C}$  NMR of above peptide in 5 % D<sub>2</sub>O/CD<sub>3</sub>OD at 298.1 K.



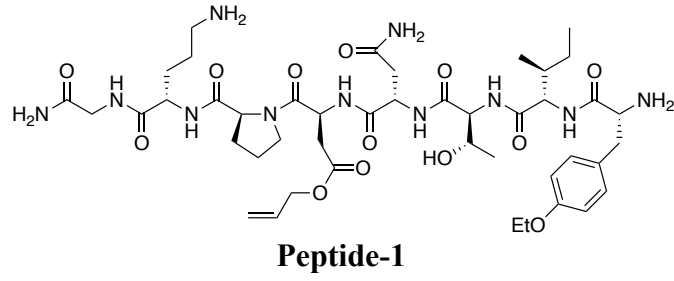

**<sup>13</sup>C NMR (151 MHz)**

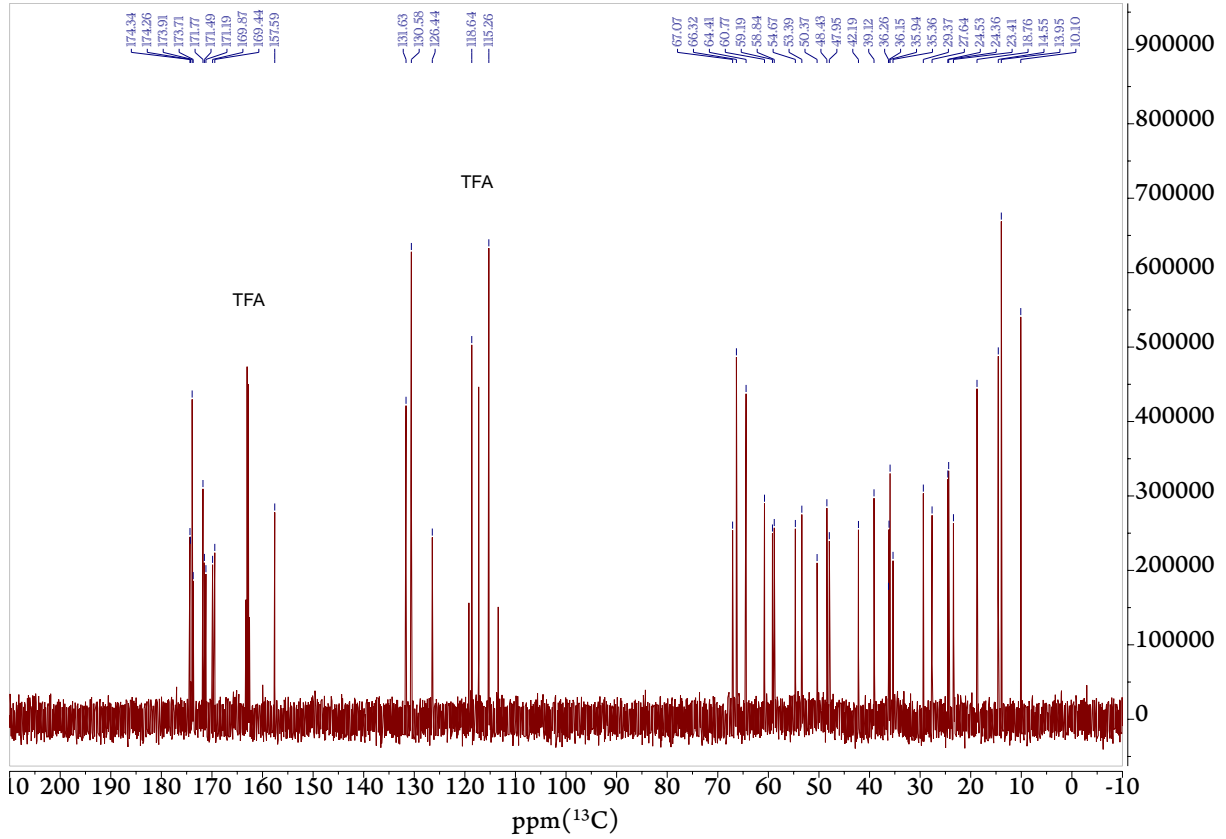

<sup>13</sup>C NMR of above peptide in 50 mM Na<sub>3</sub>PO<sub>4</sub> (pH 4.0), 100 μM TSP, 90% H<sub>2</sub>O/D<sub>2</sub>O, at 298.1 K.



**$^{13}\text{C}$  NMR (151 MHz)**

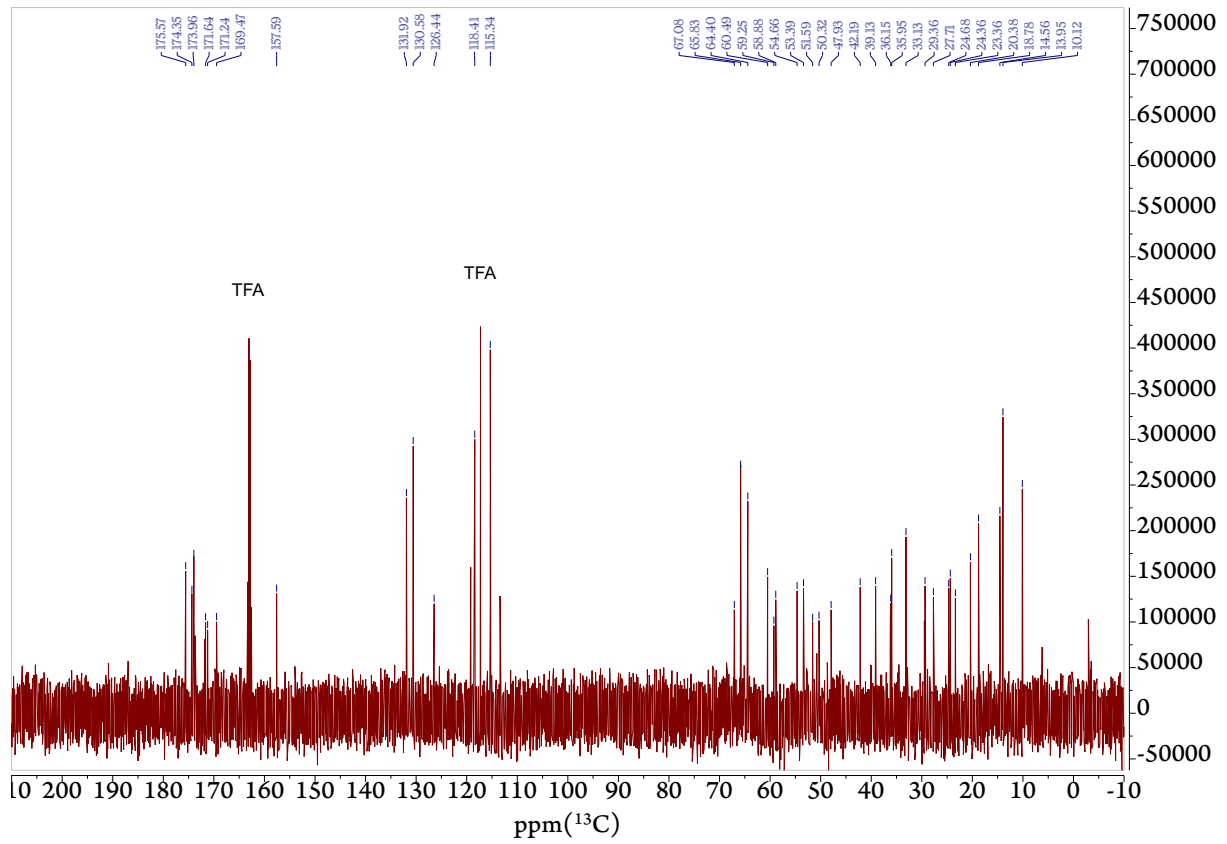

$^{13}\text{C}$  NMR of above peptide in 50 mM  $\text{Na}_3\text{PO}_4$  (pH 4.0), 100  $\mu\text{M}$  TSP, 90%  $\text{H}_2\text{O}/\text{D}_2\text{O}$ , at 298.1 K.



**<sup>13</sup>C NMR (151 MHz)**

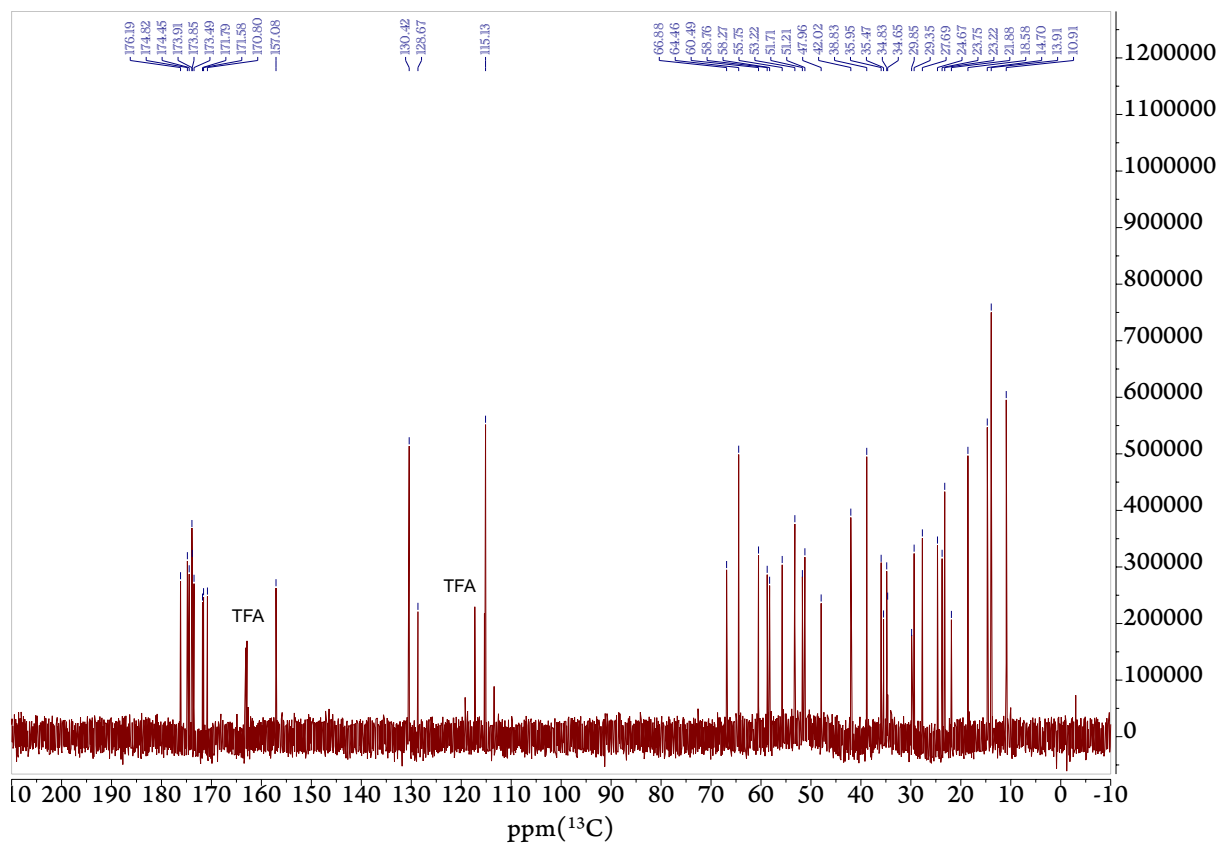

<sup>13</sup>C NMR of above peptide in 50 mM Na<sub>3</sub>PO<sub>4</sub> (pH 4.0), 100 μM TSP, 100% D<sub>2</sub>O, at 298.1 K.

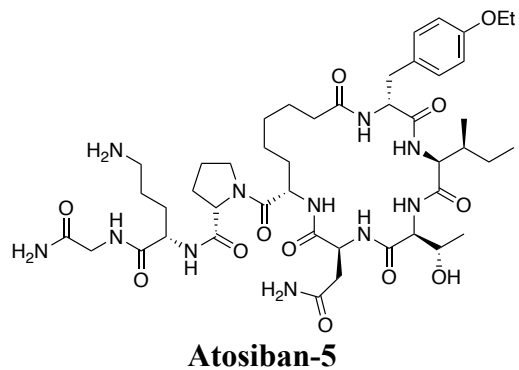

**<sup>13</sup>C NMR (151 MHz)**

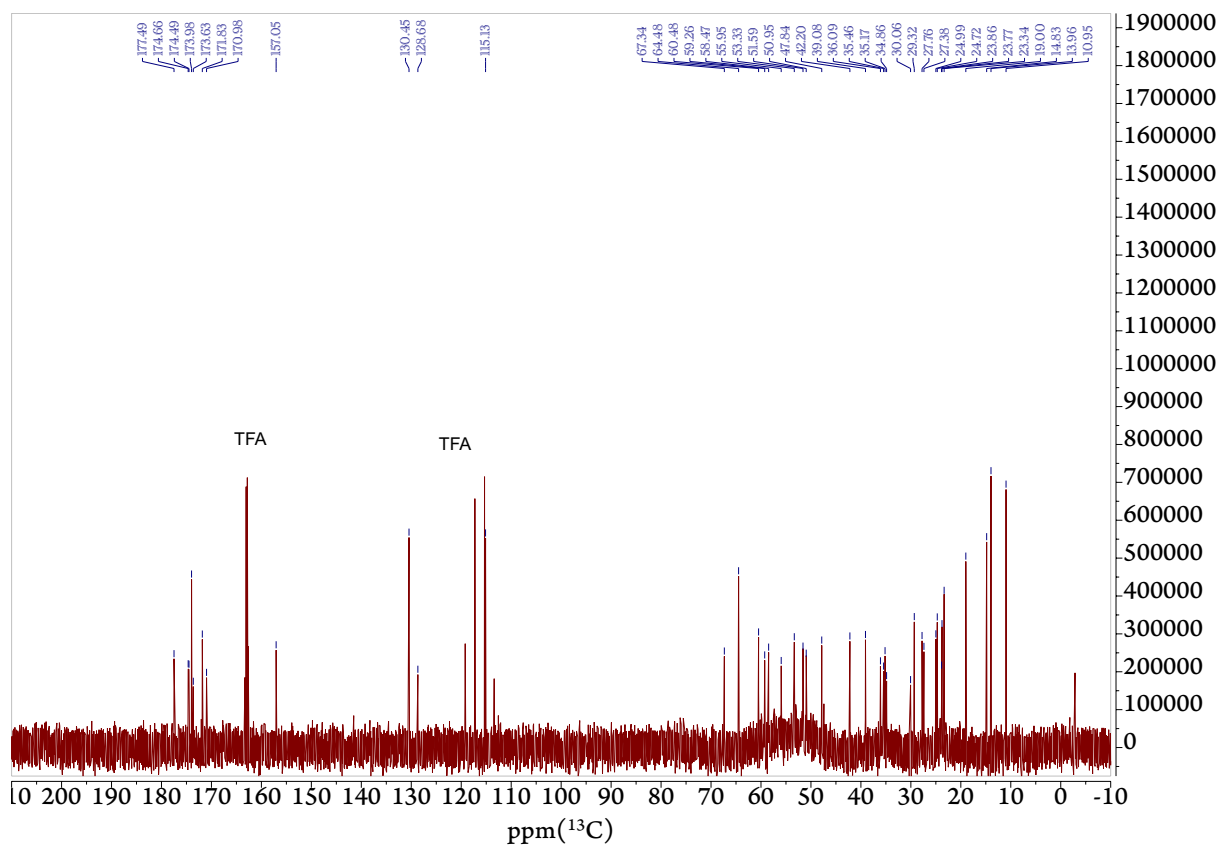

<sup>13</sup>C NMR of above peptide in 50 mM Na<sub>3</sub>PO<sub>4</sub> (pH 4.0), 100 μM TSP, 100% D<sub>2</sub>O, at 298.1 K.



**<sup>13</sup>C NMR (151 MHz)**

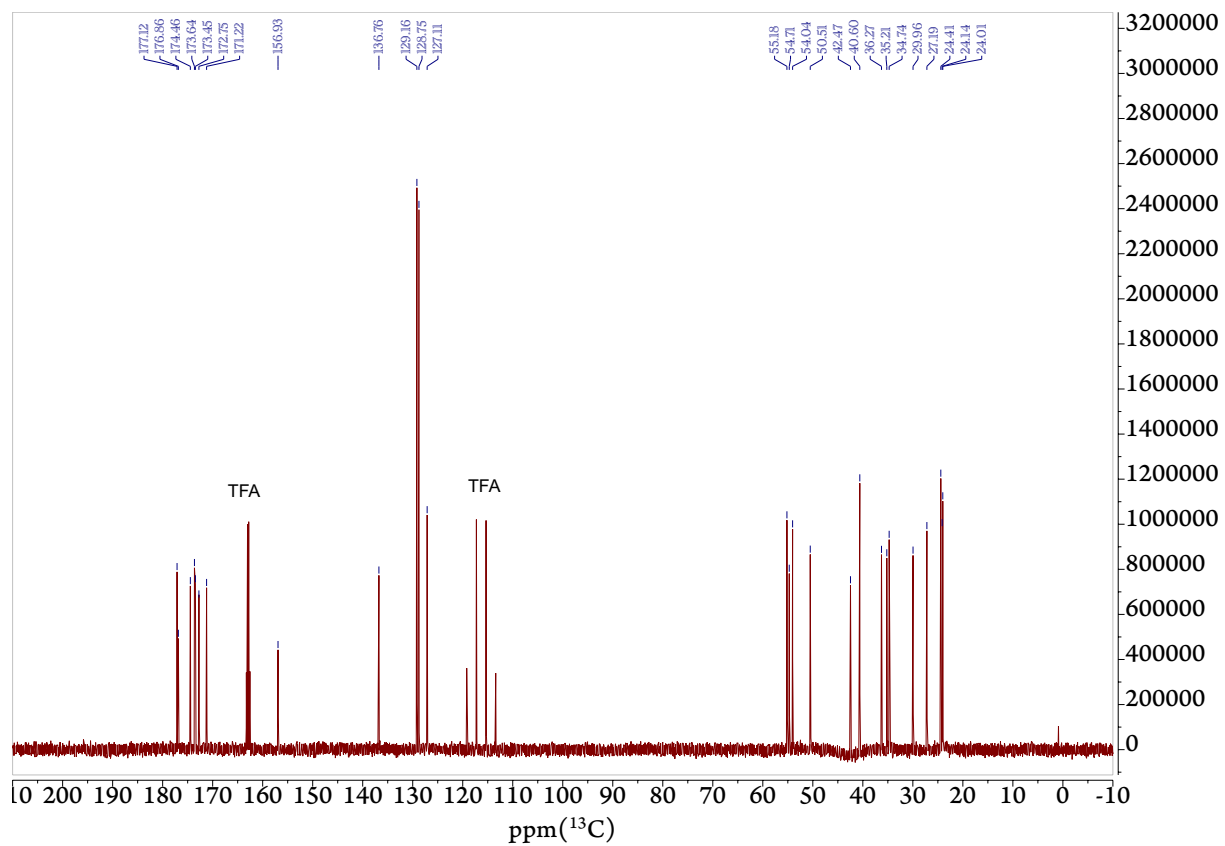

<sup>13</sup>C NMR of above peptide in 50 mM Na<sub>3</sub>PO<sub>4</sub> (pH 4.0), 100 μM TSP, 10% D<sub>2</sub>O/H<sub>2</sub>O, at 298.1 K.

## References

- (1) Qin, T.; Malins, L. R.; Edwards, J. T.; Merchant, R. R.; Novak, A. J. E.; Zhong, J. Z.; Mills, R. B.; Yan, M.; Yuan, C.; Eastgate, M. D.; Baran, P. S. Nickel-Catalyzed Barton Decarboxylation and Giese Reactions: A Practical Take on Classic Transforms. *Angew. Chem. Int. Ed.* **2017**, *56* (1), 260–265. <https://doi.org/10.1002/anie.201609662>.
